# Supplementary material for: Biomimetic synthesis, antibacterial activity and structure–activity properties of the pyroglutamate core of oxazolomycin
Source: Royal Society of Chemistry journal article supplement (doi:10.1039/c2ob00042c), 2012-01-01
Supplement: c2ob00042c_2.pdf [file c2ob00042c_2.pdf]

Instrument DQX400  
Chemist PJF  
Group MGM  
PF026  
h1acq.au CDCl3 {C:NMR} mgmgrp 47

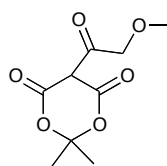

8c

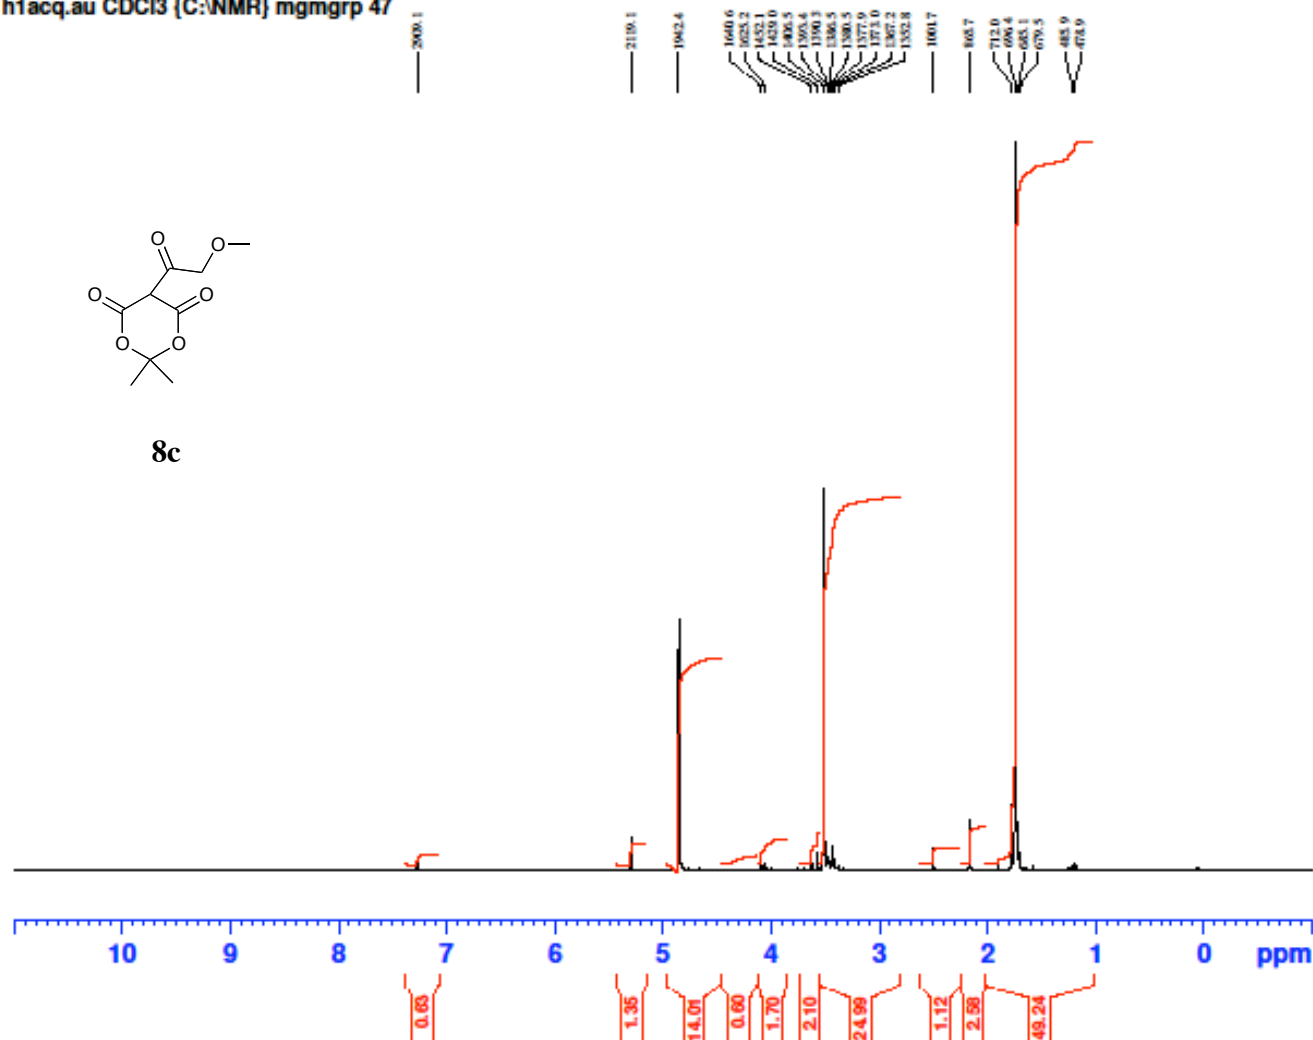

NMR@CHEM.OX

NAME Mar01-2010-47  
EXPNO 1  
PROCNO 1  
Date\_ 20100302  
Time 0.10  
INSTRUM av400  
PROBHD 5 mm QNP 1H/13  
PULPROG zgpg30  
TD 65536  
SOLVENT CDCl3  
NS 16  
DS 2  
SWH 8278.146 Hz  
FIDRES 0.126314 Hz  
AQ 3.9584243 sec  
RG 90.5  
DW 60.400 usec  
DE 7.50 usec  
TE 300.0 K  
D1 1.00000000 sec

===== CHANNEL f1 =====  
NUC1 1H  
P1 9.00 usec  
PL1 0.00 dB  
SFO1 400.2024714 MHz  
SI 32768  
SF 400.2000028 MHz  
WDW EM  
SSB 0  
LB 0.30 Hz  
GB 0  
PC 1.00

Instrument DQX400  
Chemist PJF  
Group MGM  
PF026  
c13acq.au CDCl3 {C:NMR} mgmgrp 47

NMR@CHEM.OX

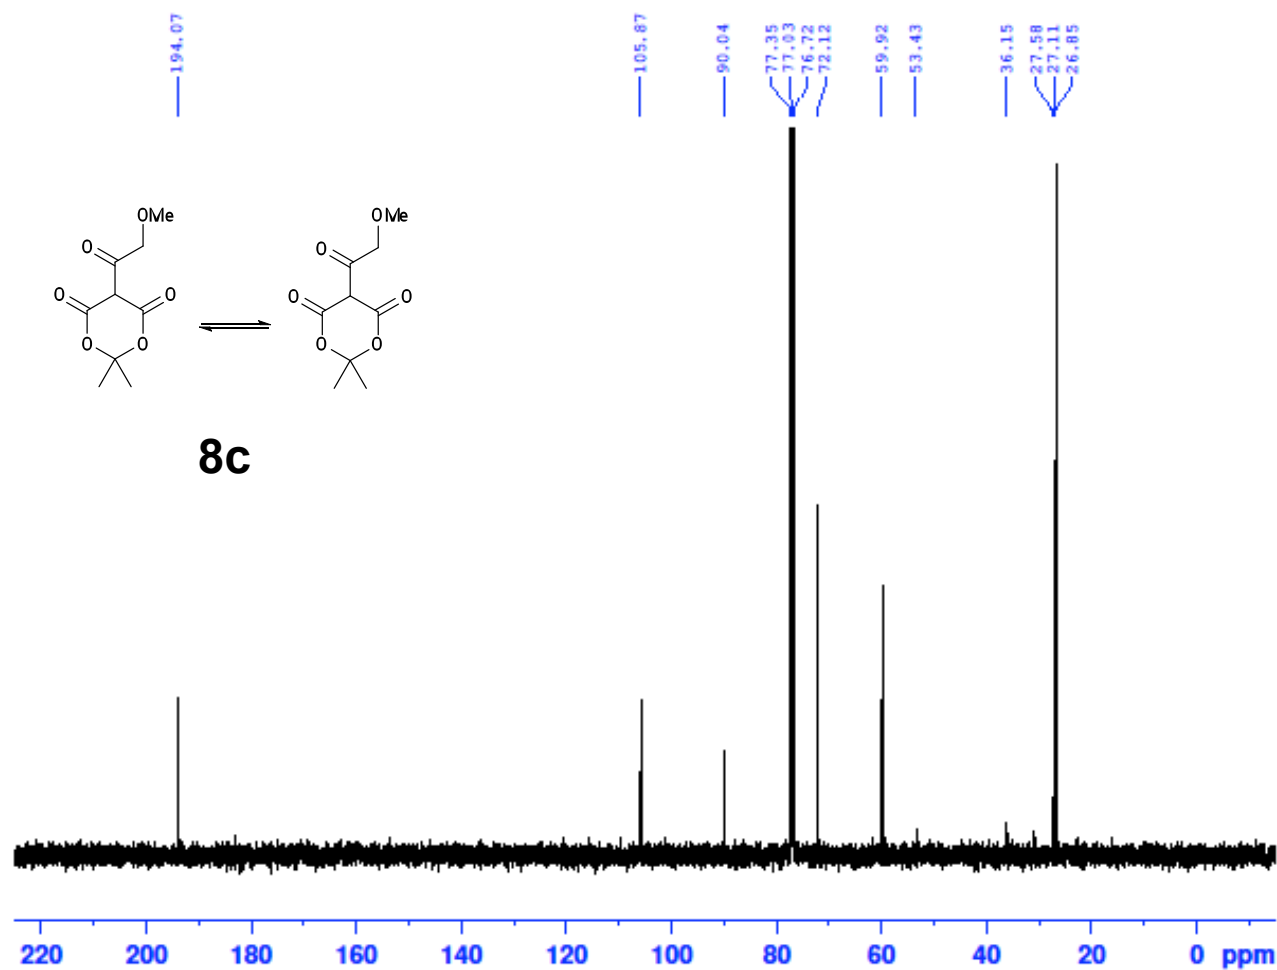

NAME Mar01-2010-47  
EXPNO 2  
PROCNO 1  
Date\_ 20100302  
Time 0.18  
INSTRUM av400  
PROBHD 5 mm QNP 1H/13  
PULPROG zgpg30  
TD 32768  
SOLVENT CDCl3  
NS 256  
DS 4  
SWH 26178.010 Hz  
FIDRES 0.798889 Hz  
AQ 0.6259188 sec  
RG 32768  
DW 19.100 usec  
DE 7.50 usec  
TE 300.0 K  
D1 1.00000000 sec  
D11 0.03000000 sec  
TD0 1

===== CHANNEL f1 =====  
NUC1 13C  
P1 9.50 usec  
PL1 0.00 dB  
SFO1 100.6403931 MHz

===== CHANNEL f2 =====  
CPDPRG2 waltz16  
NUC2 1H  
PCPD2 80.00 usec  
PL2 0.00 dB  
PL12 19.00 dB  
PL13 25.00 dB  
SFO2 400.2016008 MHz  
SI 32768  
SF 100.6303718 MHz  
WDW EM  
SSB 0  
LB 1.00 Hz  
GB 0  
PC 1.40

Instrument DQX400  
Chemist PJF  
Group MGM  
PF040  
h1acq.au CDCl3 (C:NMR) mgmgrp 51

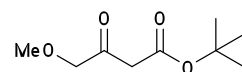

9a

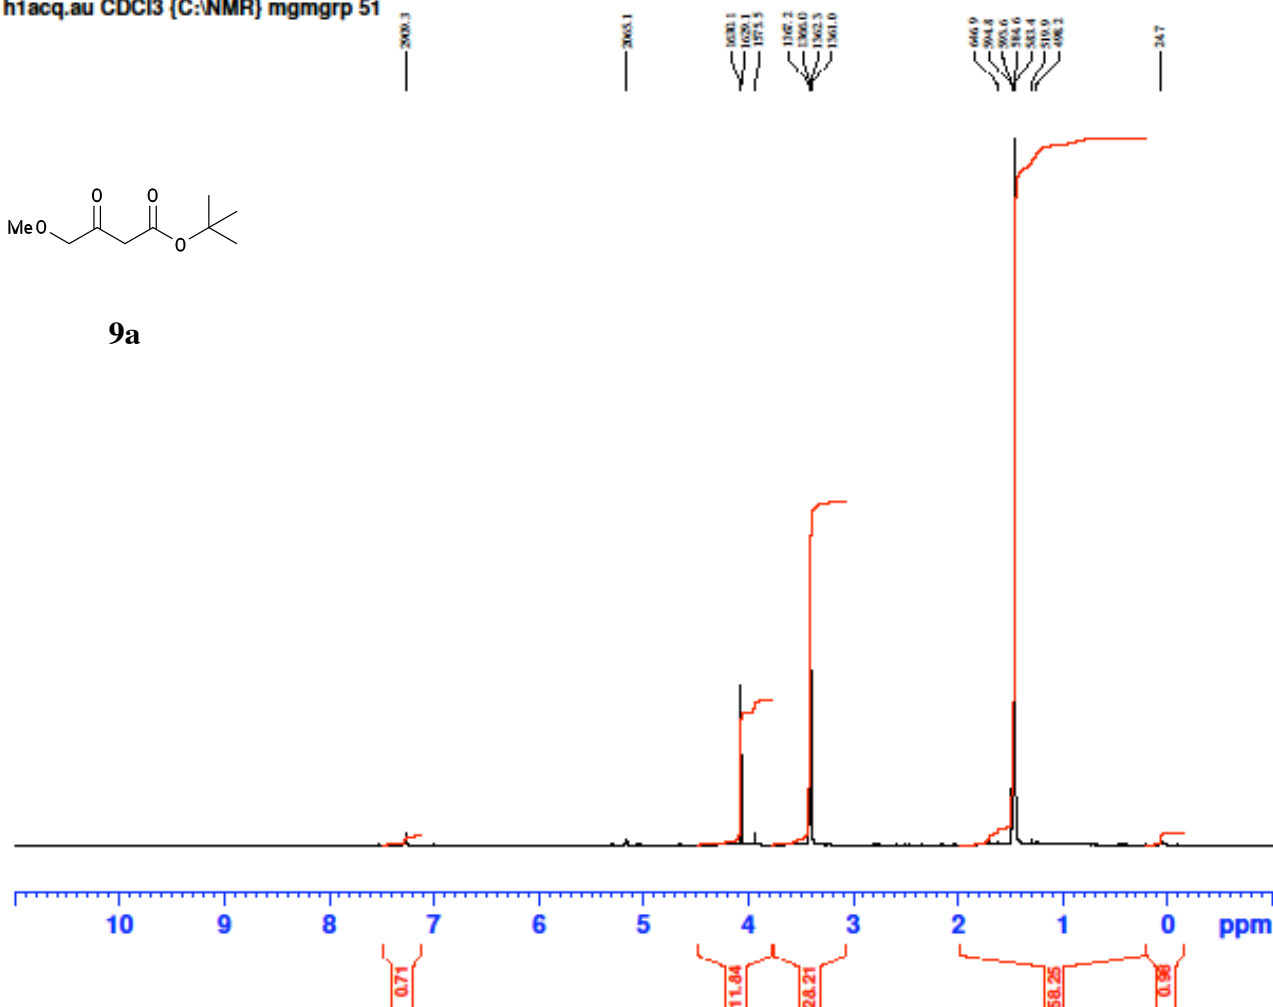

NMR@CHEM.OX

NAME Mar02-2010-51  
EXPNO 1  
PROCNO 1  
Date\_ 20100302  
Time 21.20  
INSTRUM av400  
PROBHD 5 mm QNP 1H/13  
PULPROG zgpg30  
TD 65536  
SOLVENT CDCl3  
NS 16  
DS 2  
SWH 8278.146 Hz  
FIDRES 0.126314 Hz  
AQ 3.9584243 sec  
RG 90.5  
DW 60.400 usec  
DE 7.50 usec  
TE 300.0 K  
D1 1.00000000 sec

===== CHANNEL f1 =====  
NUC1 1H  
P1 9.00 usec  
PL1 0.00 dB  
SFO1 400.2024714 MHz  
SI 32768  
SF 400.2000028 MHz  
WDW EM  
SSB 0  
LB 0.30 Hz  
GB 0  
PC 1.00

Instrument DQX400  
Chemist PJF  
Group MGM  
PF040  
c13acq.au CDC13 (C:NMR) mgmgrp 51

NMR@CHEM.OX

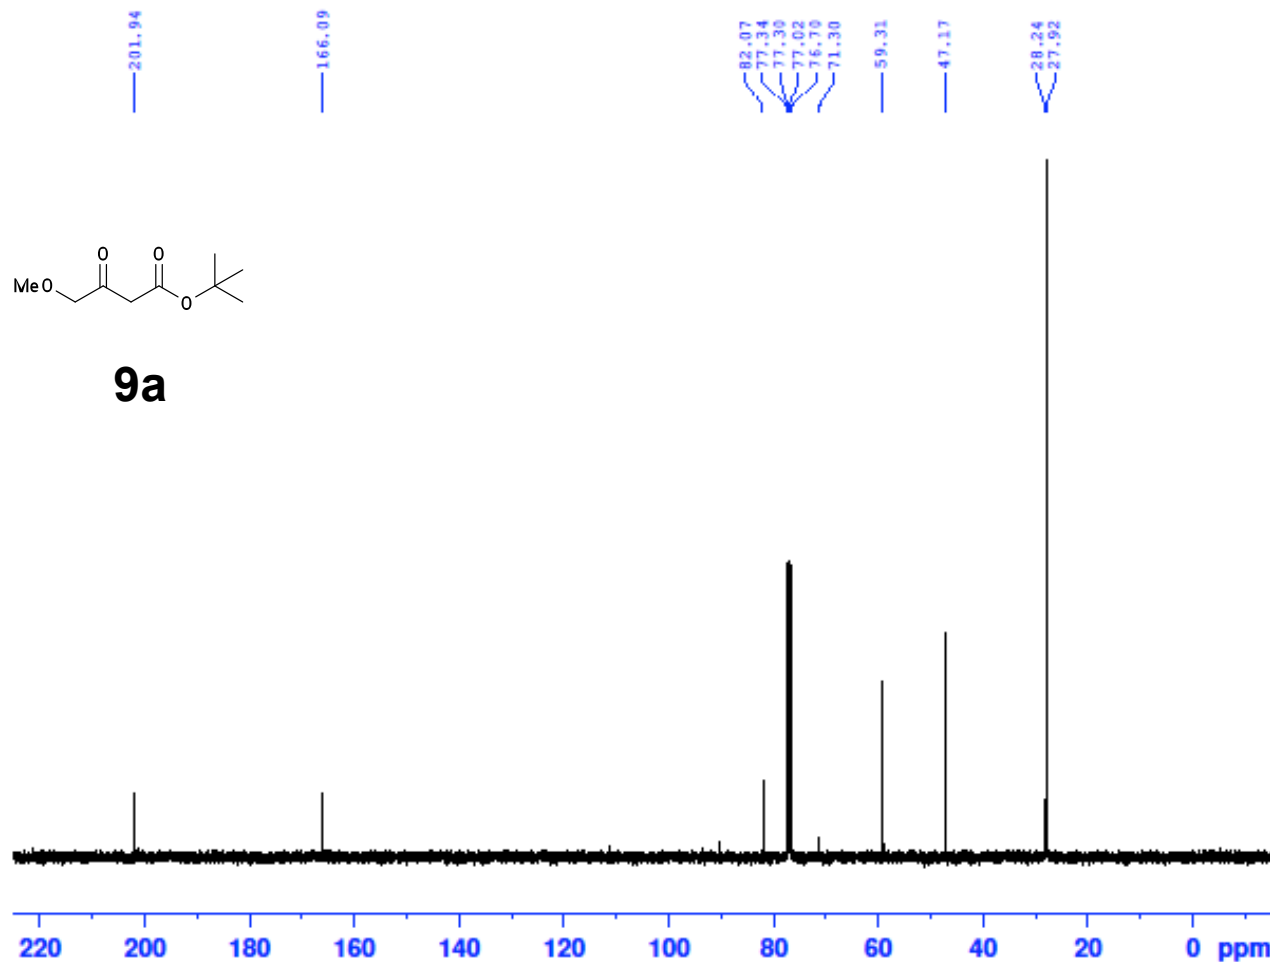

NAME Mar02-2010-51  
EXPNO 2  
PROCNO 1  
Date\_ 20100302  
Time 21.27  
INSTRUM av400  
PROBHD 5 mm QNP 1H/13  
PULPROG zgpg30  
TD 32768  
SOLVENT CDC13  
NS 256  
DS 4  
SWH 26178.010 Hz  
FIDRES 0.798889 Hz  
AQ 0.6259188 sec  
RG 32768  
DW 19.100 usec  
DE 7.50 usec  
TE 300.0 K  
D1 1.00000000 sec  
D11 0.03000000 sec  
TD0 1

===== CHANNEL f1 =====  
NUC1 13C  
P1 9.50 usec  
PL1 0.00 dB  
SFO1 100.6403931 MHz

===== CHANNEL f2 =====  
CPDPRG2 waltz16  
NUC2 1H  
PCPD2 80.00 usec  
PL2 0.00 dB  
PL12 19.00 dB  
PL13 25.00 dB  
SFO2 400.2016008 MHz  
SI 32768  
SF 100.6303718 MHz  
WDW EM  
SSB 0  
LB 1.00 Hz  
GB 0  
PC 1.40

Instrument DQX400  
Chemist PJF  
Group MGM  
PF035  
h1acq.au CDCI3 {C:NMR} mgmgrp 18

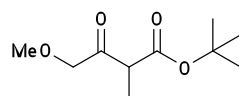

**9b**

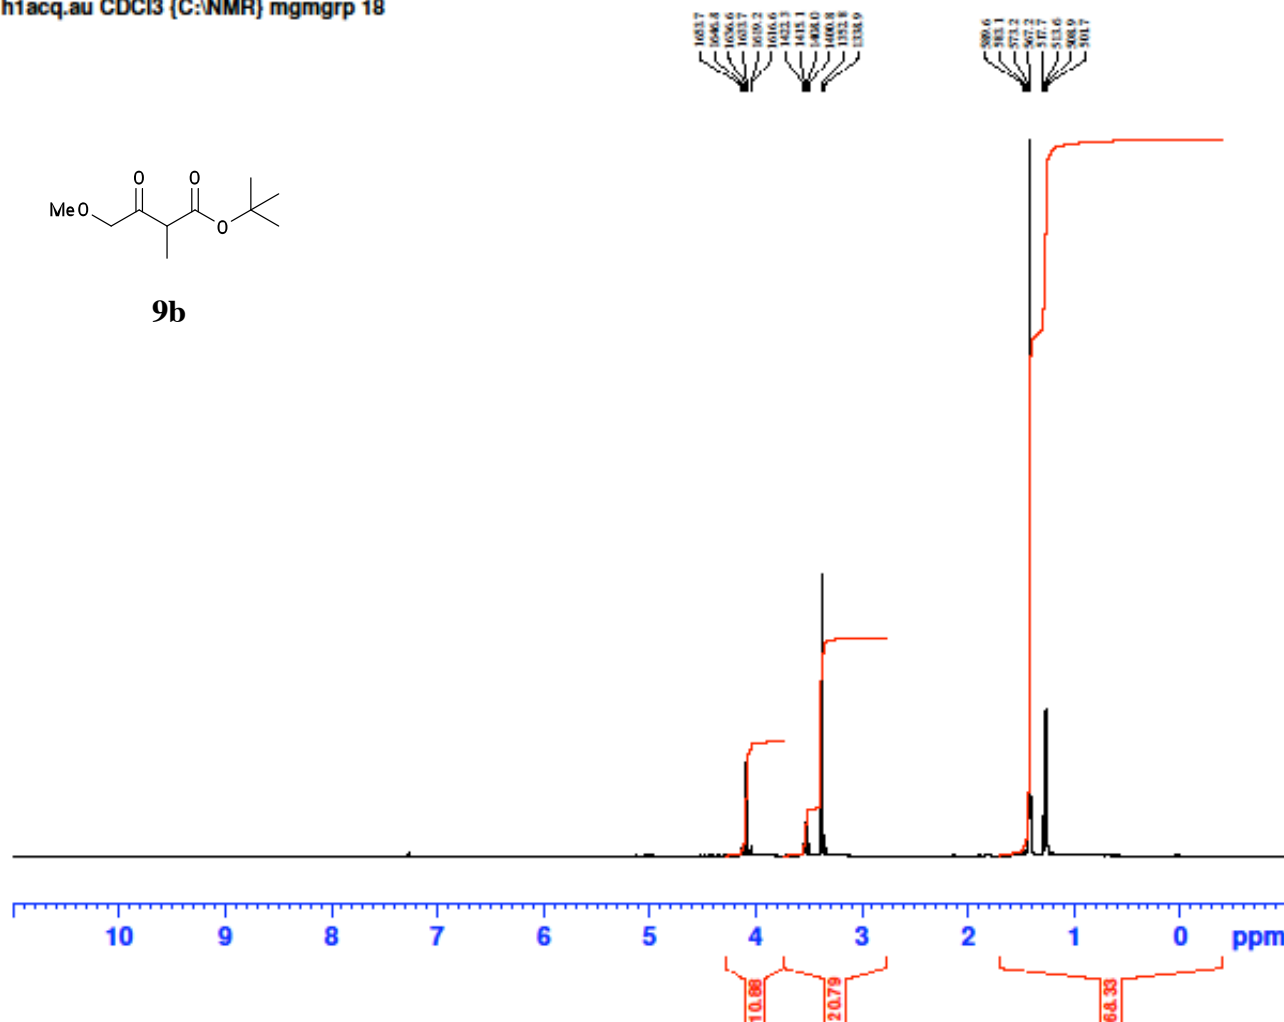

NMR@CHEM.OX

NAME Apr12-2010-18  
EXPNO 1  
PROCNO 1  
Date\_ 20100412  
Time 18.13  
INSTRUM av400  
PROBHD 5 mm QNP 1H/13  
PULPROG zgpg30  
TD 65536  
SOLVENT CDCl3  
NS 16  
DS 2  
SWH 8278.146 Hz  
FIDRES 0.126314 Hz  
AQ 3.9584243 sec  
RG 32  
DW 60.400 usec  
DE 7.50 usec  
TE 300.0 K  
D1 1.00000000 sec

===== CHANNEL f1 =====  
NUC1 1H  
P1 9.00 usec  
PL1 0.00 dB  
SFO1 400.2024714 MHz  
SI 32768  
SF 400.2000028 MHz  
WDW EM  
SSB 0  
LB 0.30 Hz  
GB 0  
PC 1.00

Instrument DQX400  
Chemist PJF  
Group MGM  
PF035  
c13acq.au CDCl3 {C:NMR} mgmgrp 18

NMR@CHEM.OX

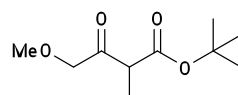

**9b**

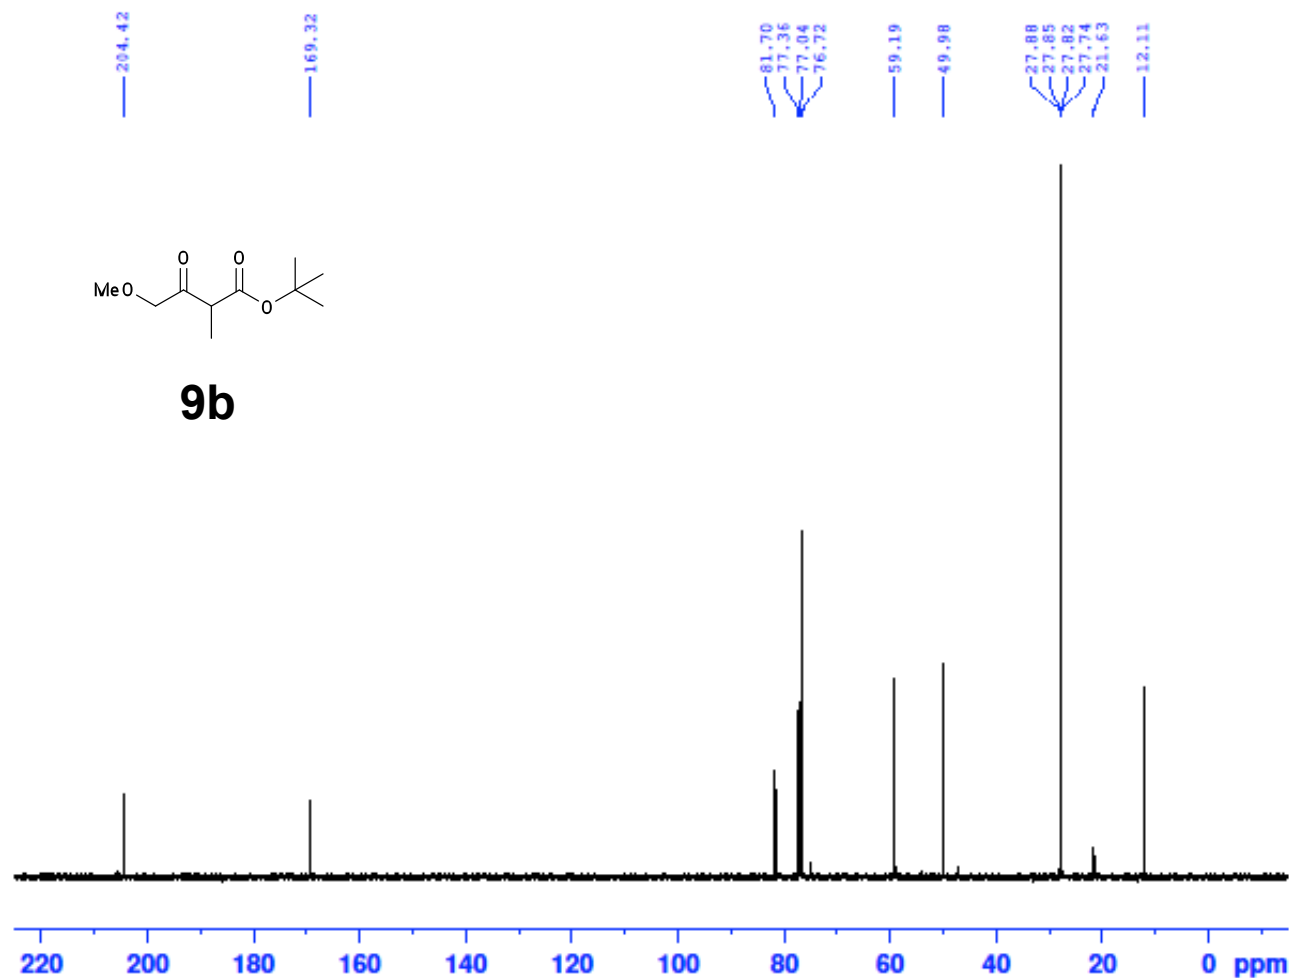

```

NAME      Apr12-2010-18
EXPNO     2
PROCNO    1
Date_     20100412
Time      18.21
INSTRUM   av400
PROBHD    5 mm QNP 1H/13
PULPROG   zgpg30
TD        32768
SOLVENT   CDCl3
NS        256
DS        4
SWH       26178.010 Hz
FIDRES    0.798889 Hz
AQ        0.6259188 sec
RG        32768
DW        19.100 usec
DE        7.50 usec
TE        300.0 K
D1        1.00000000 sec
D11       0.03000000 sec
TD0       1

===== CHANNEL f1 =====
NUC1      13C
P1        9.50 usec
PL1       0.00 dB
SFO1     100.6403931 MHz

===== CHANNEL f2 =====
CPDPRG2   waltz16
NUC2      1H
PCPD2     80.00 usec
PL2       0.00 dB
PL12      19.00 dB
PL13      25.00 dB
SFO2     400.2016008 MHz
SI        32768
SF       100.6303718 MHz
WDW       EM
SSB       0
LB        1.00 Hz
GB        0
PC        1.40
    
```

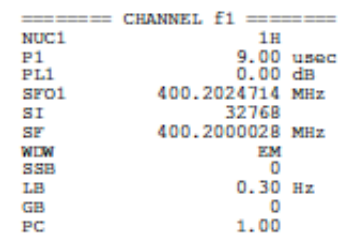

Instrument DQX400  
Chemist PJF  
Group MGM  
PF028  
c13acq.au CDCl3 {C:NMR} mgmgrp 11

NMR@CHEM.OX

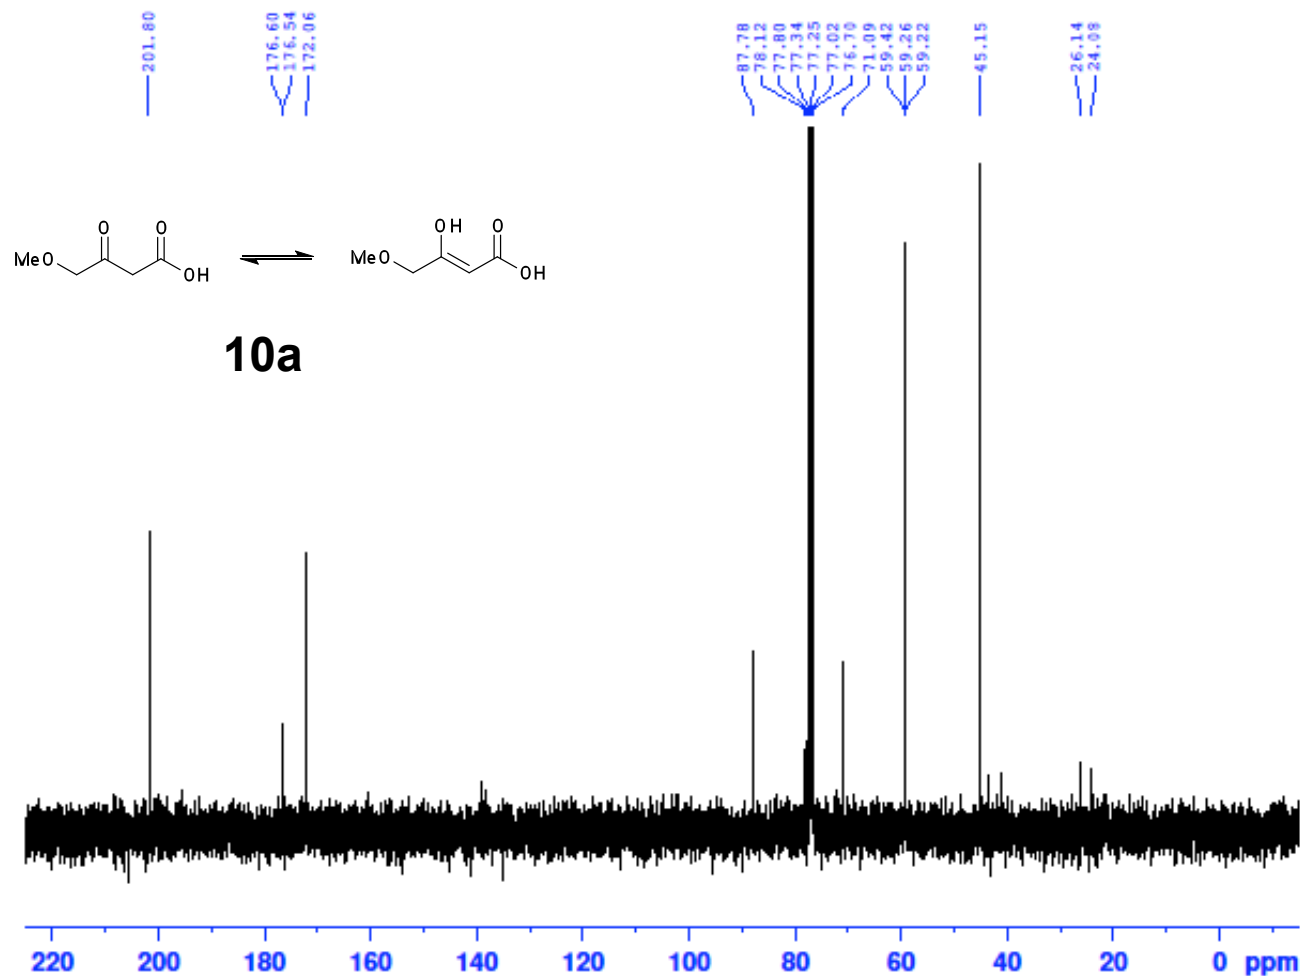

NAME Mar22-2010-11  
EXPNO 2  
PROCNO 1  
Date\_ 20100322  
Time 12.51  
INSTRUM av400  
PROBHD 5 mm QNP 1H/13  
PULPROG zgpg30  
TD 32768  
SOLVENT CDCl3  
NS 256  
DS 4  
SWH 26178.010 Hz  
FIDRES 0.798889 Hz  
AQ 0.6259188 sec  
RG 32768  
DW 19.100 usec  
DE 7.50 usec  
TE 300.0 K  
D1 1.00000000 sec  
D11 0.03000000 sec  
TD0 1

===== CHANNEL f1 =====  
NUC1 13C  
P1 9.50 usec  
PL1 0.00 dB  
SFO1 100.6403931 MHz

===== CHANNEL f2 =====  
CPDPRG2 waltz16  
NUC2 1H  
PCPD2 80.00 usec  
PL2 0.00 dB  
PL12 19.00 dB  
PL13 25.00 dB  
SFO2 400.2016008 MHz  
SI 32768  
SF 100.6303718 MHz  
WDW EM  
SSB 0  
LB 1.00 Hz  
GB 0  
PC 1.40



## 4 –Benzyloxy-3-oxobutanoic acid

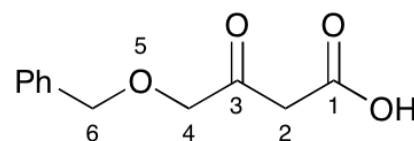

**10b**

Instrument DQX400  
Chemist ykschau  
Group mgm  
SC 086  
h1acq.au CDC13 (C-NMR) mgmgrp 41

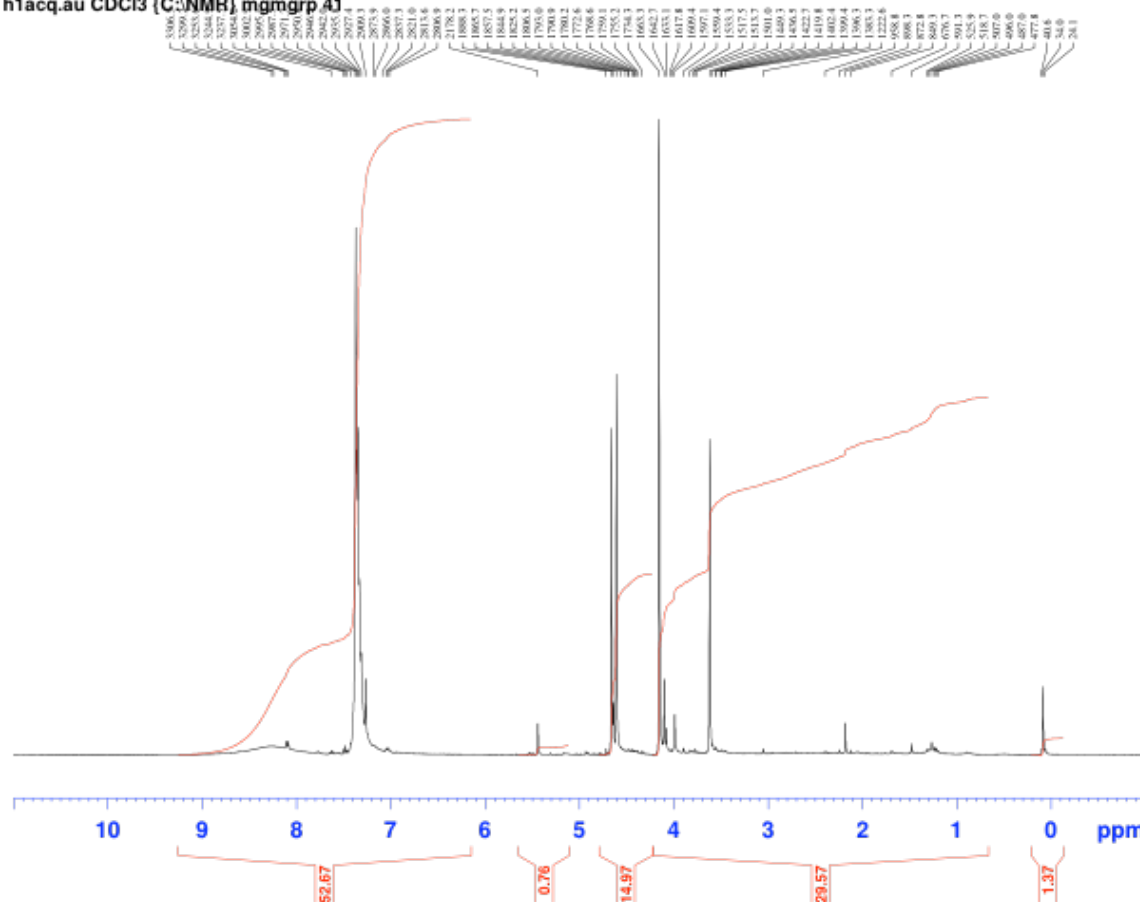

**NMR@CHEM.OX**

```

NAME      Mar29-2010-41
EXPNO     1
PROCNO    1
Date_     20100329
Time      17.51
INSTRUM   av400
PROBHD    5 mm QNP 1H/13
PULPROG   zgpg30
TD         65536
SOLVENT   CDCl3
NS         16
DS         2
SWH        8278.146 Hz
FIDRES     0.126314 Hz
AQ         3.9584243 sec
RG         161.3
DW         60.400 usec
DE         7.50 usec
TE         300.0 K
D1         1.00000000 sec

===== CHANNEL f1 =====
NUC1       13C
P1         9.00 usec
PL1        0.00 dB
SFO1       400.2024714 MHz
SI         32768
SF         400.2000028 MHz
WDW        EM
SSB        0
LB         0.30 Hz
GB         0
PC         1.00
    
```

## 4 –Benzyloxy-3-oxobutanoic acid



**10b**

Instrument DQX400  
Chemist ykschau  
Group mgm  
SC 086  
c13acq.au CDCl3 {C:NMR} mgmgrp 41

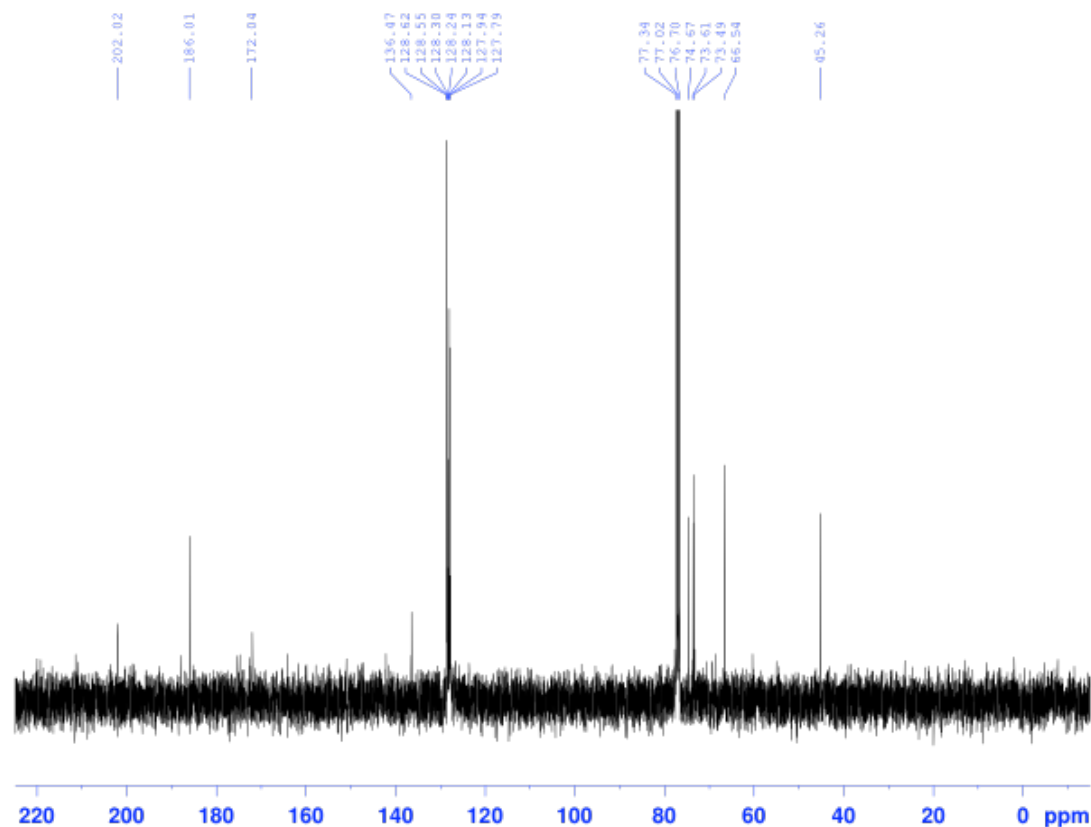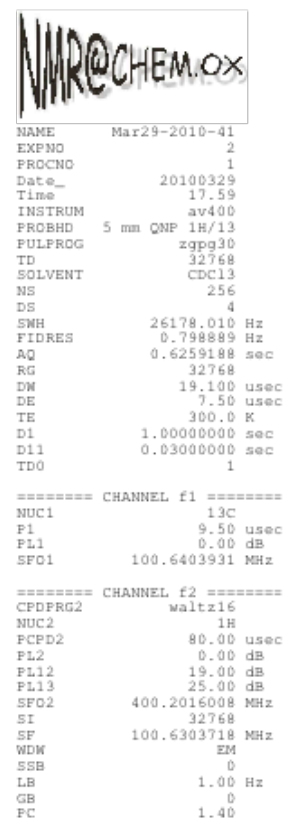



# 4-(*tert*-butoxy)-3-oxobutanoic acid

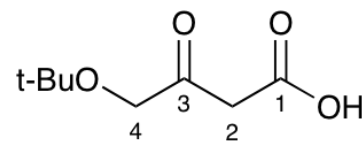

**10c**

Instrument DQX400  
Chemist ykschau  
Group mgm  
SC 088  
c13acq.au CDCl<sub>3</sub> {C:NMR} mgmgrp 34

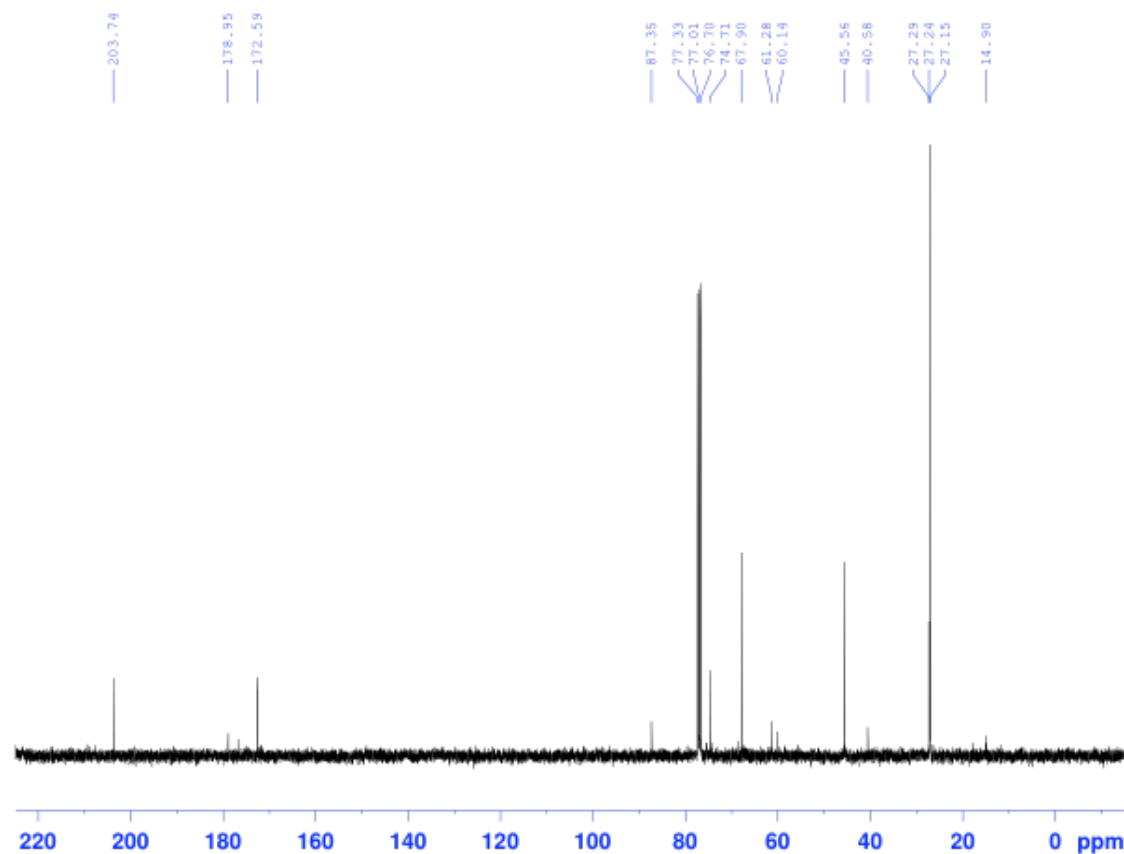

NMR@CHEM.OX

NAME Mar24-2010-34  
EXPNO 2  
PROCNO 1  
Date\_ 20100325  
Time 13.11  
INSTRUM av400  
PROBHD 5 mm QNP 1H/13  
PULPROG zgpg30  
TD 32768  
SOLVENT CDCl<sub>3</sub>  
NS 256  
DS 4  
SWH 26178.010 Hz  
FIDRES 0.798889 Hz  
AQ 0.6259188 sec  
RG 32768  
DM 19.100 usec  
DE 7.50 usec  
TE 300.0 K  
D1 1.00000000 sec  
D11 0.03000000 sec  
TD0 1

===== CHANNEL f1 =====  
NUC1 13C  
P1 9.50 usec  
PL1 0.00 dB  
SFO1 100.6403931 MHz

===== CHANNEL f2 =====  
CPDPRG2 waltz16  
NUC2 1H  
PCPD2 80.00 usec  
PL2 0.00 dB  
PL12 19.00 dB  
PL13 25.00 dB  
SFO2 400.2016008 MHz  
SI 32768  
SF 100.6303718 MHz  
WDM EM  
SSB 0  
LB 1.00 Hz  
GB 0  
PC 1.40



Instrument DQX400  
Chemist PJF  
Group MGM  
PF035  
c13acq.au CDCl3 {C:NMR} mgmgrp 17

NMR@CHEM.OX

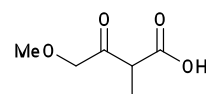

10d

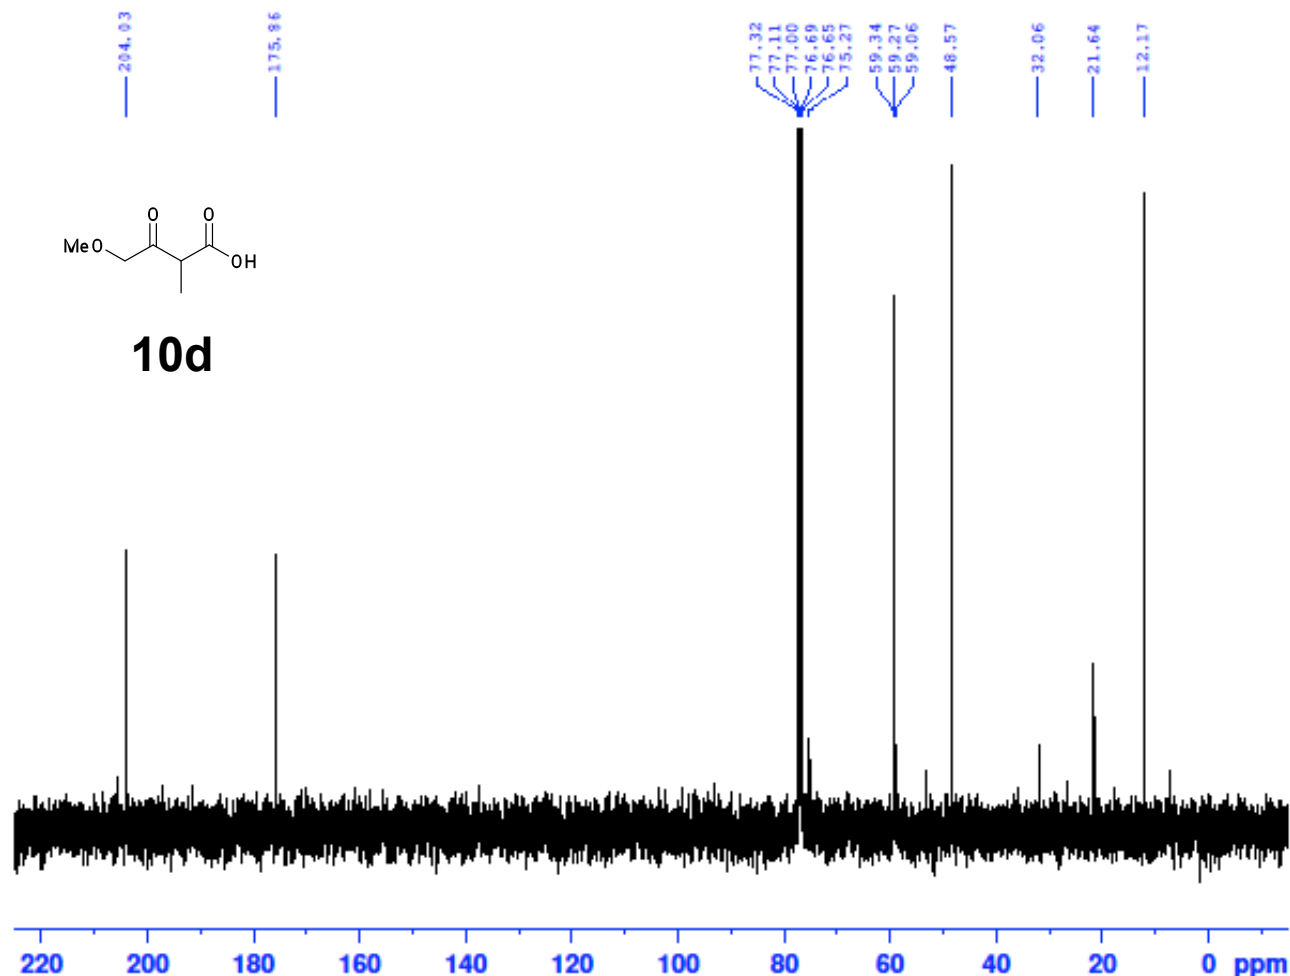

NAME Apr15-2010-17  
EXPNO 2  
PROCNO 1  
Date\_ 20100416  
Time 1.01  
INSTRUM av400  
PROBHD 5 mm QNP 1H/13  
PULPROG zgpg30  
TD 32768  
SOLVENT CDCl3  
NS 256  
DS 4  
SWH 26178.010 Hz  
FIDRES 0.798889 Hz  
AQ 0.6259188 sec  
RG 32768  
DW 19.100 usec  
DE 7.50 usec  
TE 300.0 K  
D1 1.00000000 sec  
D11 0.03000000 sec  
TD0 1

===== CHANNEL f1 =====  
NUC1 13C  
P1 9.50 usec  
PL1 0.00 dB  
SFO1 100.6403931 MHz

===== CHANNEL f2 =====  
CPDPRG2 waltz16  
NUC2 1H  
PCPD2 80.00 usec  
PL2 0.00 dB  
PL12 19.00 dB  
PL13 25.00 dB  
SFO2 400.2016008 MHz  
SI 32768  
SF 100.6303718 MHz  
WDW EM  
SSB 0  
LB 1.00 Hz  
GB 0  
PC 1.40

# 4-(benzyloxy)-2-methyl-3-oxobutanoic acid

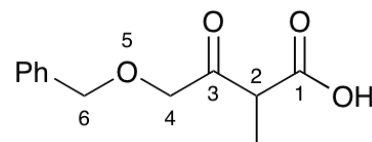

10e

Instrument DQX400  
Chemist ykschau  
Group mgm  
SC115 crude  
h1acq.au CDCI3 {C:NMR} mgmgrp 48

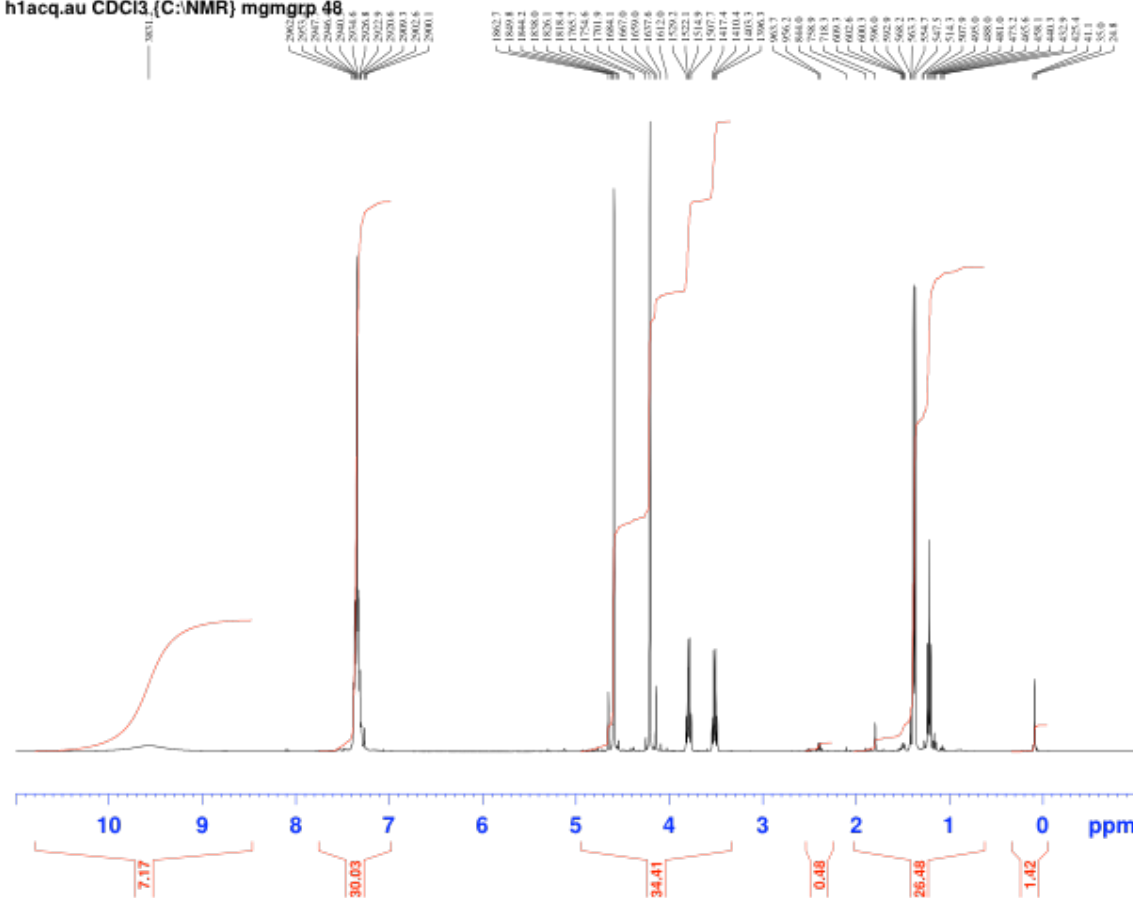

NMR@CHEM.OX

NAME May09-2010-48  
EXPNO 1  
PROCNO 1  
Date\_ 20100509  
Time 22.03  
INSTRUM av400  
PROBHD 5 mm QNP 1H/13  
PULPROG zgpg30  
TD 65536  
SOLVENT CDCl3  
NS 16  
DS 2  
SWH 8278.146 Hz  
FIDRES 0.126314 Hz  
AQ 3.9584243 sec  
RG 90.5  
DW 60.400 usec  
DE 7.50 usec  
TE 300.0 K  
D1 1.00000000 sec

===== CHANNEL f1 =====  
NUC1 1H  
P1 9.00 usec  
PL1 0.00 dB  
SFO1 400.2024714 MHz  
SI 32768  
SF 400.2000028 MHz  
WDW EM  
SSB 0  
LB 0.30 Hz  
GB 0  
PC 1.00

# 4-(benzyloxy)-2-methyl-3-oxobutanoic acid

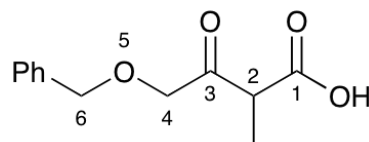

**10e**

Instrument DQX400  
Chemist ykschau  
Group mgm  
SC115 crude  
c13acq.au CDCl3 {C:NMR} mgmgrp 48

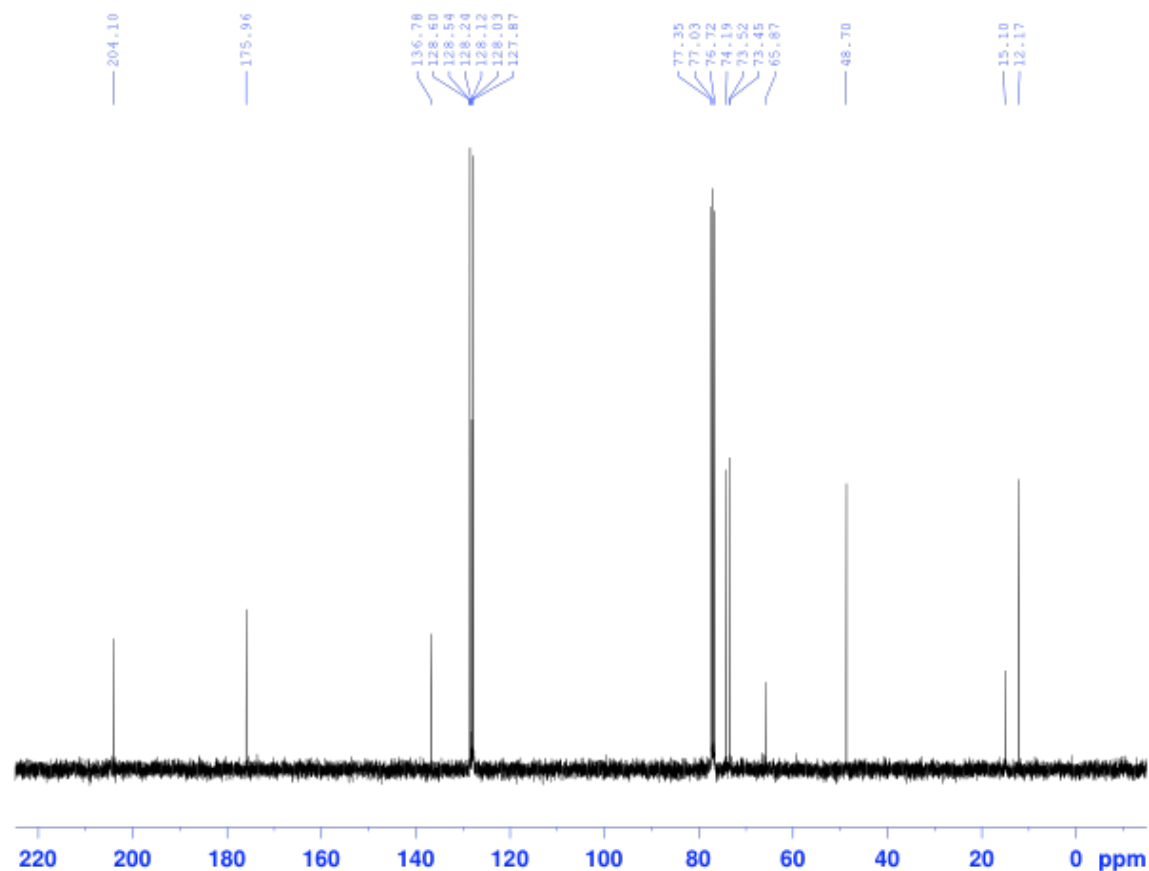

NMR@CHEM.OX

NAME May09-2010-48  
EXPNO 2  
PROCNO 1  
Date\_ 20100509  
Time 22.11  
INSTRUM av400  
PROBHD 5 mm QNP 1H/13  
PULPROG zgpg30  
TD 32768  
SOLVENT CDCl3  
NS 256  
DS 4  
SWH 26178.010 Hz  
FIDRES 0.798889 Hz  
AQ 0.6259188 sec  
RG 32768  
DM 19.100 usec  
DE 7.50 usec  
TE 300.0 K  
D1 1.00000000 sec  
D11 0.03000000 sec  
TD0 1

===== CHANNEL f1 =====  
NUC1 13C  
P1 9.50 usec  
PL1 0.00 dB  
SFO1 100.6403931 MHz

===== CHANNEL f2 =====  
CPDPRG2 waltz16  
NUC2 1H  
PCPD2 80.00 usec  
PL2 0.00 dB  
PL12 19.00 dB  
PL13 25.00 dB  
SFO2 400.2016008 MHz  
SI 32768  
SF 100.6303718 MHz  
WDW EM  
SSB 0  
LB 1.00 Hz  
GB 0  
PC 1.40



# 4-(*tert*-butoxy)-2-methyl-3-oxobutanoic acid

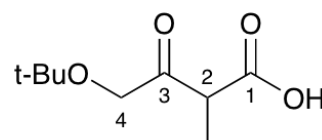

**10f**

Instrument DPX200  
Chemist ykschau  
Group mgm  
SC112 crude  
h1acq.au CDCl3 (C:NMR) mgmgrp 20

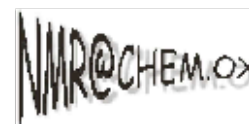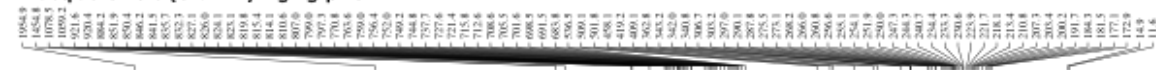

Current Data Parameters  
NAME May06-2010-20  
EXPNO 2  
PROCNO 1

F2 - Acquisition Parameters  
Date\_ 20100506  
Time 16.28  
INSTRUM dpx200  
PROBHD 5 mm Dual 13C/  
PULPROG zgpg30  
TD 16384  
SOLVENT CDCl3  
NS 16  
DS 2  
SWH 2796.421 Hz  
FIDRES 0.170680 Hz  
AQ 2.9295092 sec  
RG 143.7  
DM 178.800 usec  
DE 6.00 usec  
TE 300.0 K  
D1 1.00000000 sec

===== CHANNEL f1 =====  
NUC1 1H  
P1 7.80 usec  
PL1 -3.00 dB  
SFO1 200.1310007 MHz

F2 - Processing parameters  
SI 32768  
SF 200.1300125 MHz  
WDW EM  
SSB 0  
LB 0.30 Hz  
GB 0  
PC 1.00

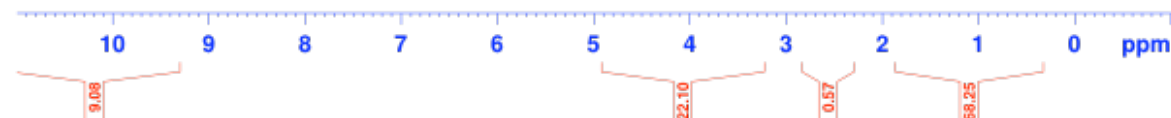

# 4-(*tert*-butoxy)-2-methyl-3-oxobutanoic acid

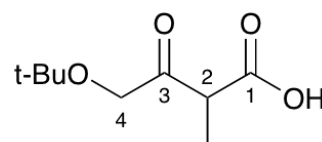

**10f**

Instrument DPX200  
Chemist ykschau  
Group mgm  
SC112 crude  
c13acq512.au CDC13 (C:\NMR) mgmarp 20

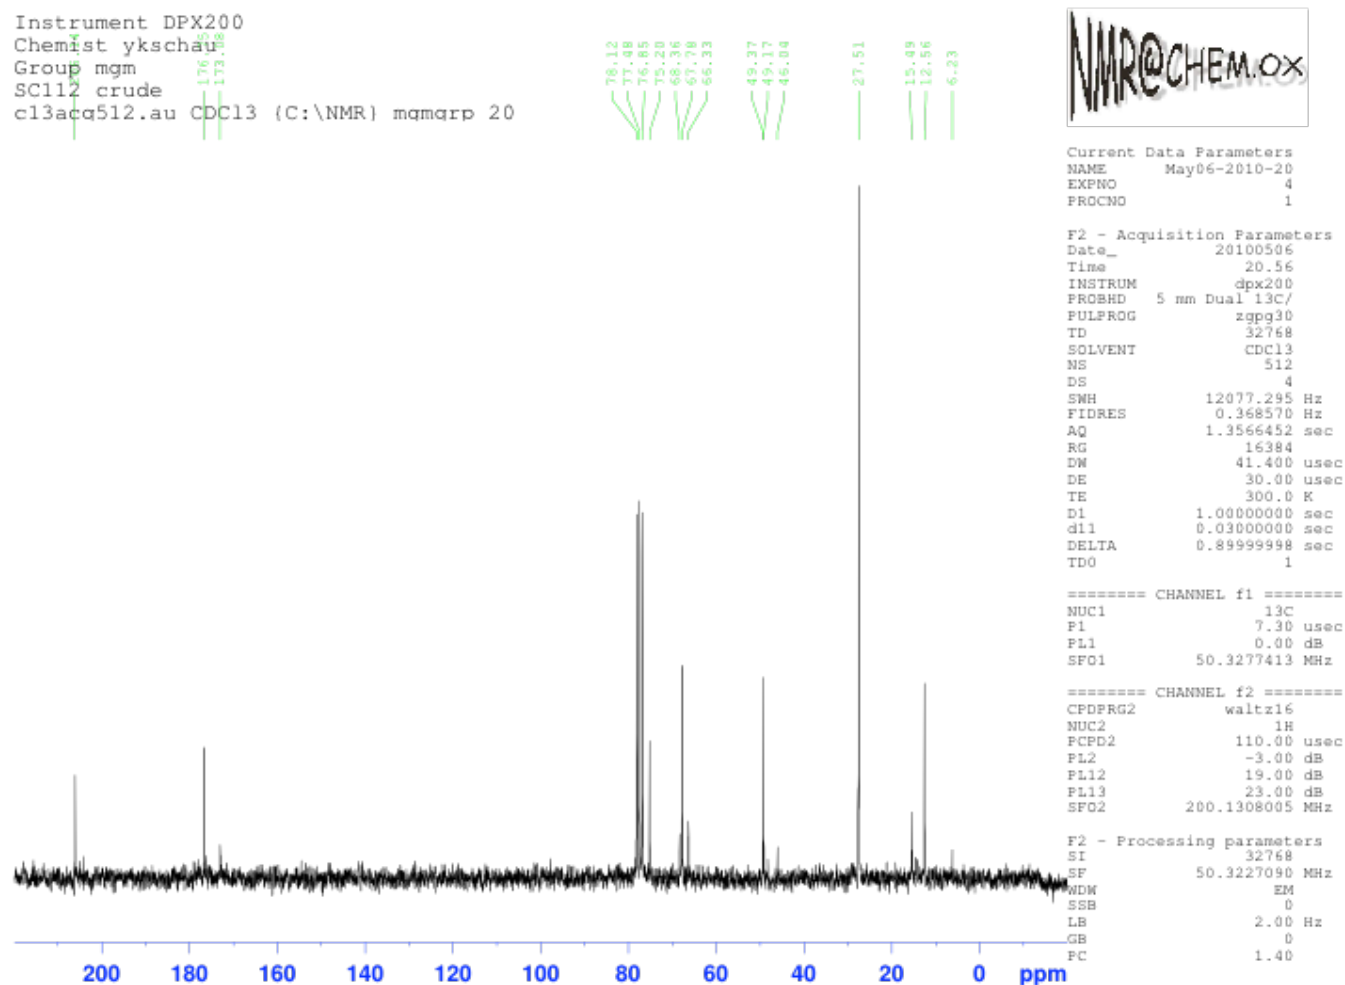

# Benzyl 4-(benzyloxy)-3-oxobutanoate

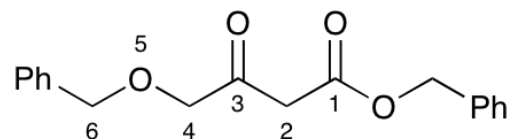

**11a**

Instrument DQX400  
Chemist SC  
Group MGM  
SC104

h1acq,au,CDCl3 (C:1NMB).mgmgrp 26

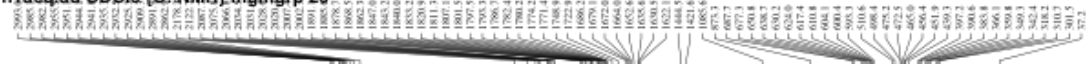

NAME Apr26-2010-26  
EXPNO 1  
PROCNO 1  
Date\_ 20100427  
Time 16.21  
INSTRUM av400  
PROBHD 5 mm QNP 1H/13  
PULPROG zgpg30  
TD 65536  
SOLVENT CDCl3  
NS 16  
DS 2  
SWH 8278.146 Hz  
FIDRES 0.126314 Hz  
AQ 3.9584243 sec  
RG 90.5  
DW 60.400 usec  
DE 7.50 usec  
TE 300.0 K  
D1 1.00000000 sec

===== CHANNEL f1 =====  
NUC1 1H  
P1 9.00 usec  
PL1 0.00 dB  
SFO1 400.2024714 MHz  
SI 32768  
SF 400.2000028 MHz  
WDW EM  
SSB 0  
LB 0.30 Hz  
GB 0  
PC 1.00

# Benzyl 4-(benzyloxy)-3-oxobutanoate

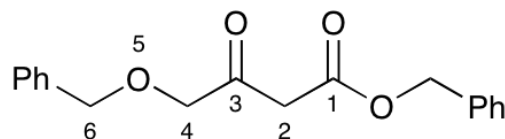

**11a**

Instrument DQX400  
Chemist SC  
Group MGM  
SC104  
c13acq.au CDCl3 {C:NMR} mgmgrp 26

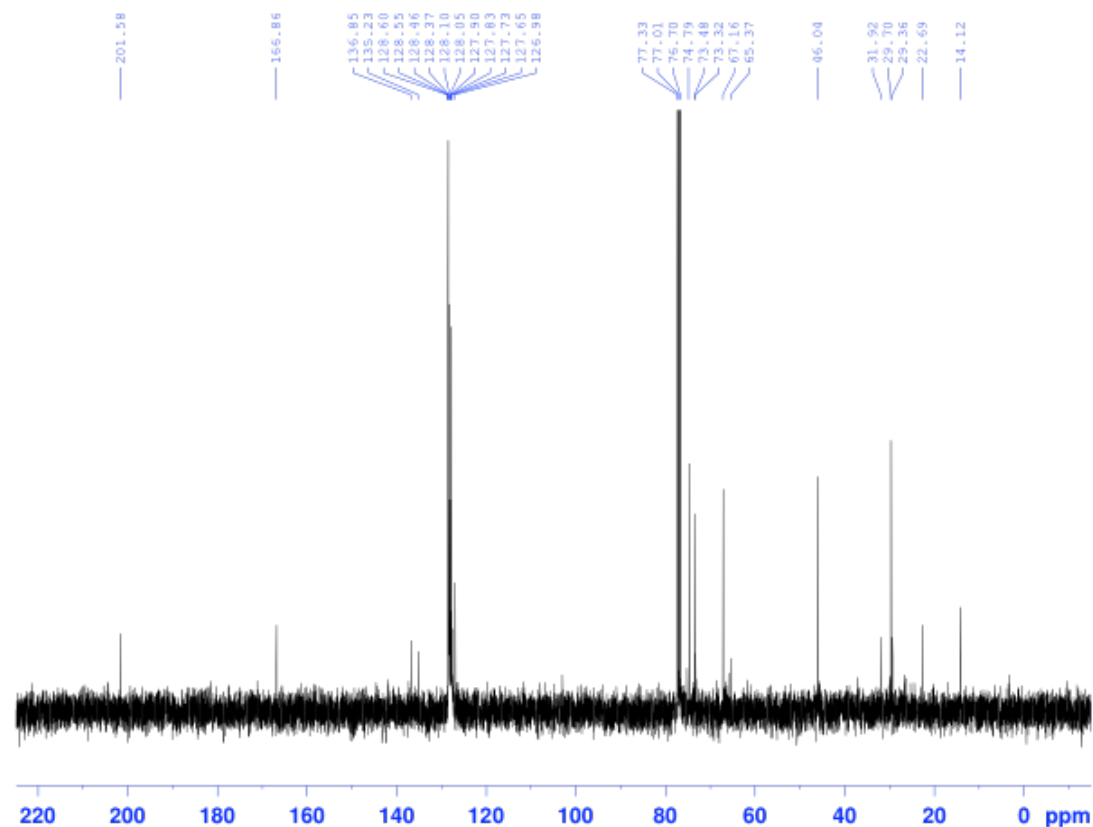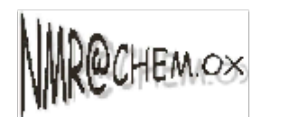

NAME Apr26-2010-26  
EXPNO 2  
PROCNO 1  
Date\_ 20100427  
Time 16.29  
INSTRUM av400  
PROBHD 5 mm QNP 1H/13  
PULPROG zgpg30  
TD 32768  
SOLVENT CDCl3  
NS 256  
DS 4  
SWH 26178.010 Hz  
FIDRES 0.798889 Hz  
AQ 0.6259188 sec  
RG 32768  
DM 19.100 usec  
DE 7.50 usec  
TE 300.0 K  
D1 1.00000000 sec  
D11 0.03000000 sec  
TD0 1

===== CHANNEL f1 =====  
NUC1 13C  
P1 9.50 usec  
PL1 0.00 dB  
SFO1 100.6403931 MHz

===== CHANNEL f2 =====  
CPDPRG2 waltz16  
NUC2 1H  
PCPD2 80.00 usec  
PL2 0.00 dB  
PL12 19.00 dB  
PL13 25.00 dB  
SFO2 400.2016008 MHz  
SI 32768  
SF 100.6303718 MHz  
WDW EM  
SSB 0  
LB 1.00 Hz  
GB 0  
PC 1.40

# Ethyl 4-(*tert*-butoxy)-3-oxobutanoate

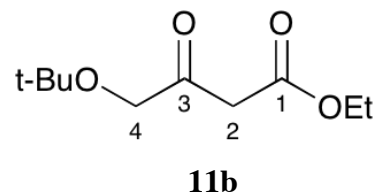

Instrument DQX400  
Chemist ykschau  
Group mgm  
SC 055 distilled  
h1acq.au CDCl3 (C:NMR) mgmgrp 8

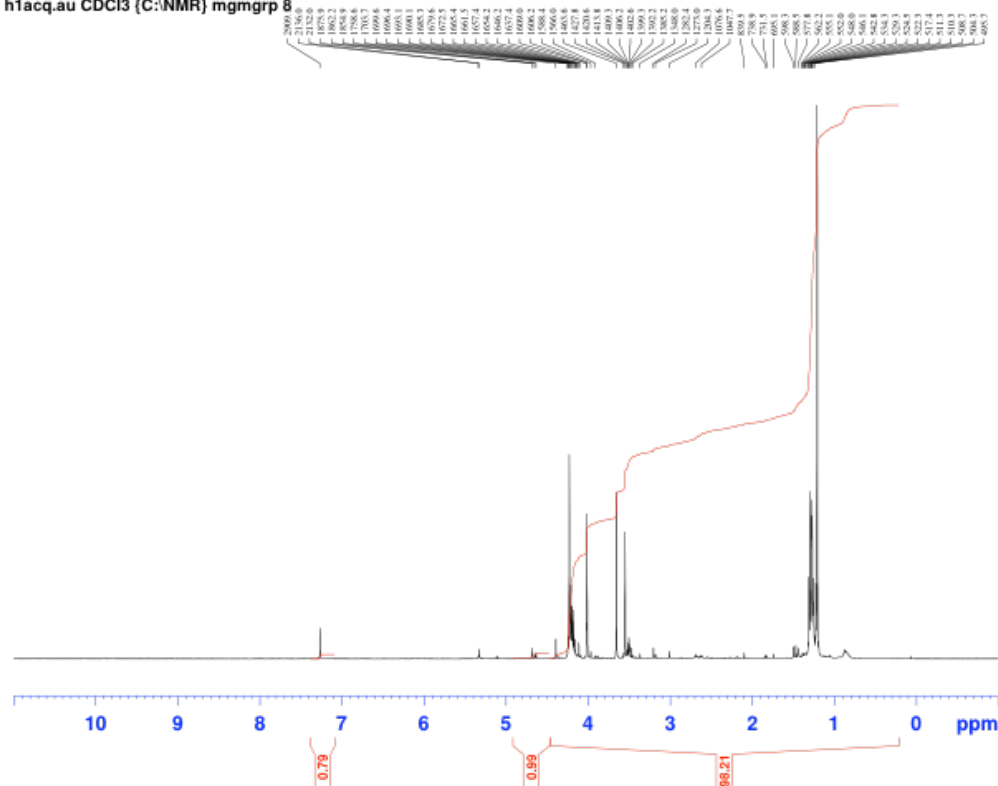

NMR@CHEM.OX

NAME Feb24-2010-8  
EXPNO 1  
PROCNO 1  
Date\_ 20100224  
Time 22.19  
INSTRUM av400  
PROBHD 5 mm QNP 1H/13  
PULPROG zgpg30  
TD 65536  
SOLVENT CDCl3  
NS 16  
DS 2  
SWH 8278.146 Hz  
FIDRES 0.126314 Hz  
AQ 3.9584243 sec  
RG 90.5  
DW 60.400 usec  
DE 7.50 usec  
TE 300.0 K  
D1 1.00000000 sec

===== CHANNEL f1 =====  
NUC1 1H  
P1 9.00 usec  
PL1 0.00 dB  
SFO1 400.2024714 MHz  
SI 32768  
SF 400.2000028 MHz  
WDW EM  
SSB 0  
LB 0.30 Hz  
GB 0  
PC 1.00

# Ethyl 4-(*tert*-butoxy)-3-oxobutanoate

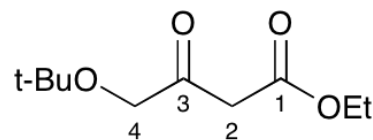

**11b**

Instrument DQX400  
Chemist ykschau  
Group mgm  
SC 055 distilled  
c13acq.au CDCl<sub>3</sub> {C:NMR} mgmgrp 8

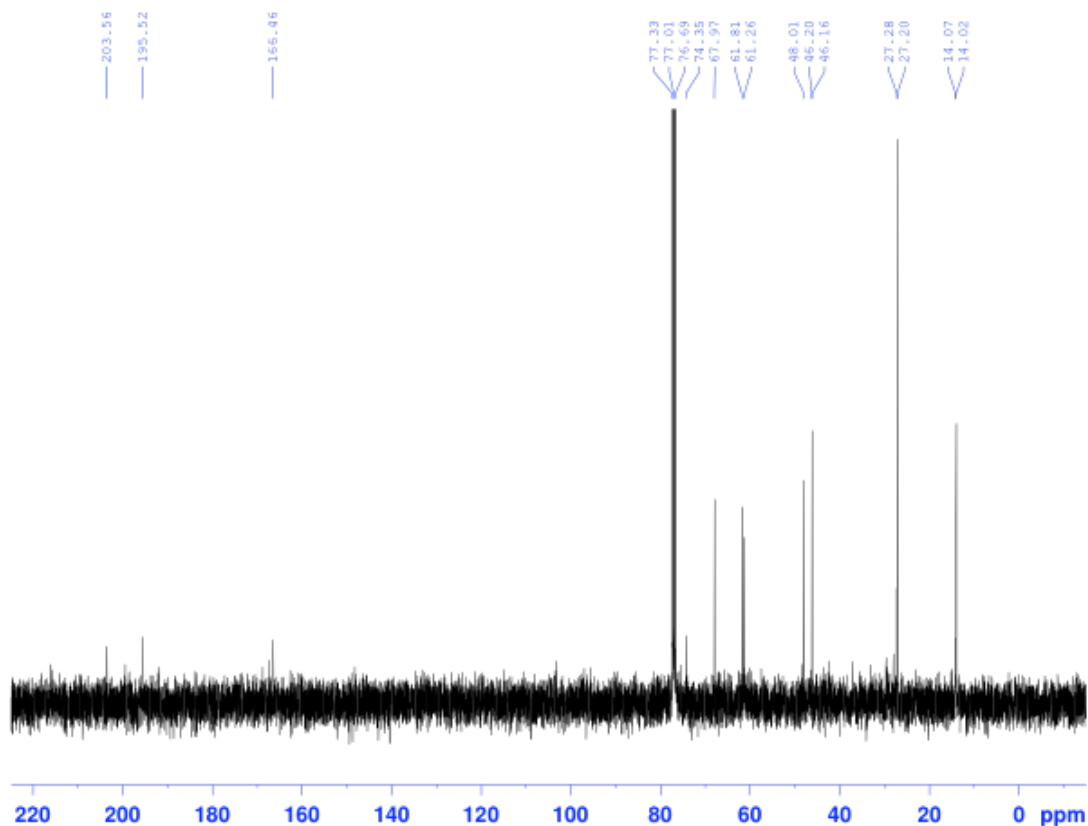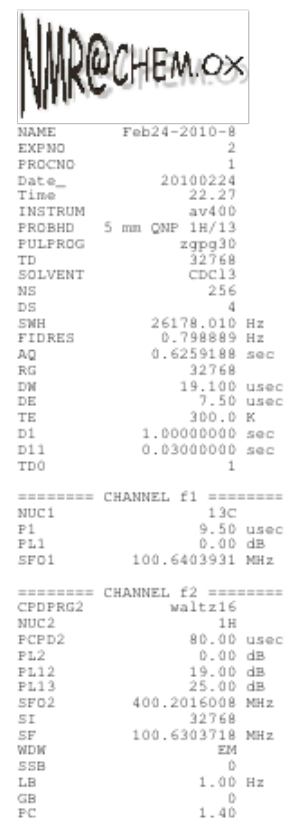

# Benzyl 4-(benzyloxy)-2-methyl-3-oxobutanoate

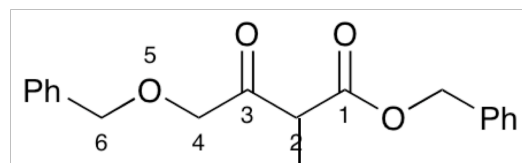

**11c**

Instrument DPX200

Chemist ykschau

Group mgm

SC 110 column f2

h1acq.au CDCl3 {C:NMR} mgmgrp 13

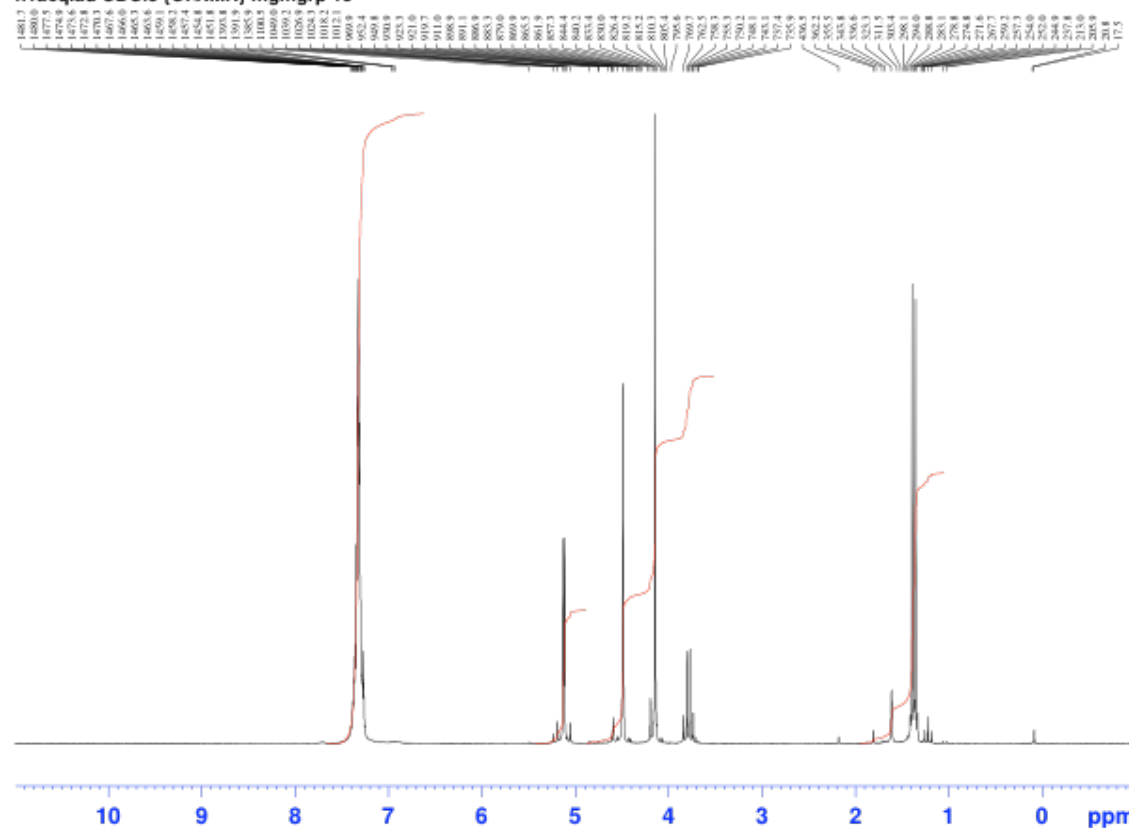

NMR@CHEM.OX

Current Data Parameters  
NAME May03-2010-13  
EXPNO 2  
PROCNO 1

F2 - Acquisition Parameters  
Date\_ 20100503  
Time 13.56  
INSTRUM dpx200  
PROBHD 5 mm Dual 13C/  
PULPROG zgpg30  
TD 16384  
SOLVENT CDCl3  
NS 16  
DS 2  
SWH 2796.421 Hz  
FIDRES 0.170680 Hz  
AQ 2.9295092 sec  
RG 456.1  
DW 178.800 usec  
DE 6.00 usec  
TE 300.0 K  
D1 1.00000000 sec

===== CHANNEL f1 =====  
NUC1 13C  
P1 7.80 usec  
PL1 -3.00 dB  
SFO1 200.1310007 MHz

F2 - Processing parameters  
SI 32768  
SF 200.1300125 MHz  
WDW EM  
SSB 0  
LB 0.30 Hz  
GB 0  
PC 1.00

# Benzyl 4-(benzyloxy)-2-methyl-3-oxobutanoate

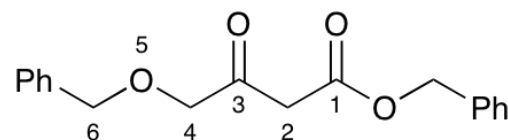

**11c**

Instrument DQX400  
Chemist ykschau  
Group mgm  
SC 110 f2  
c13acq.au CDCl3 (C:NMR) mgmgrp 43

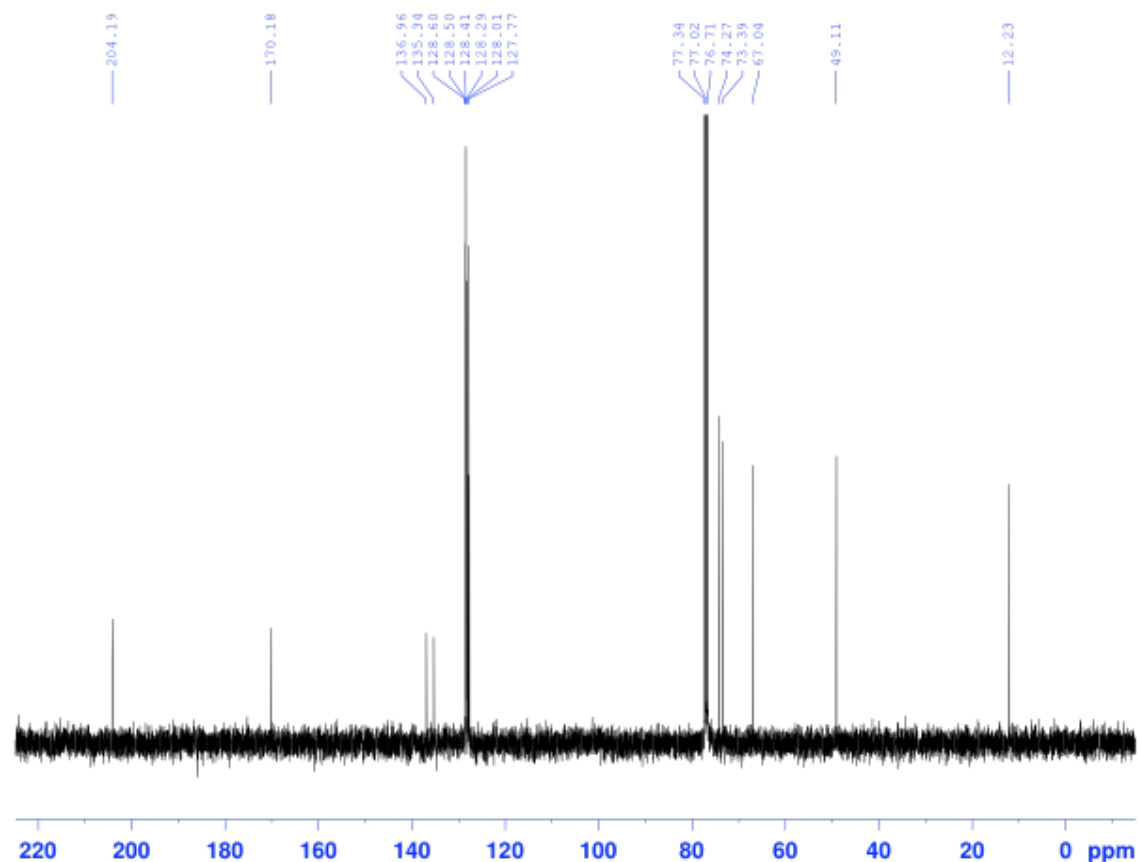

**NMR@CHEM.OX**

```

NAME      May04-2010-43
EXPNO     2
PROCNO    1
Date_     20100505
Time      0.26
INSTRUM   av400
PROBHD    5 mm QNP 1H/13
PULPROG   zgpg30
TD         32768
SOLVENT   CDCl3
NS         256
DS         4
SWH        26178.010 Hz
FIDRES     0.798889 Hz
AQ         0.6259188 sec
RG         32768
DW         19.100 usec
DE         7.50 usec
TE         300.0 K
D1         1.00000000 sec
D11        0.03000000 sec
TD0        1

===== CHANNEL f1 =====
NUC1       13C
P1         9.50 usec
PL1        0.00 dB
SFO1       100.6403931 MHz

===== CHANNEL f2 =====
CPDPRG2    waltz16
NUC2       1H
PCPD2      80.00 usec
PL2        0.00 dB
PL12       19.00 dB
PL13       25.00 dB
SFO2       400.2016008 MHz
SI         32768
SF         100.6303718 MHz
WDW        EM
SSB        0
LB         1.00 Hz
GB         0
PC         1.40
    
```



# Ethyl 4-(*tert*-butoxy)-2-methyl-3-oxobutanoate

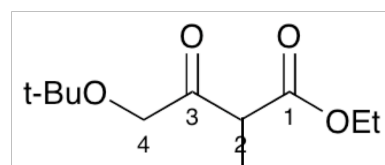

**11d**

Instrument DQX400  
Chemist ykschau  
Group mgm  
SC 101 f1  
h1acq.au CDCl3 {C:NMR} mgmgrp 3

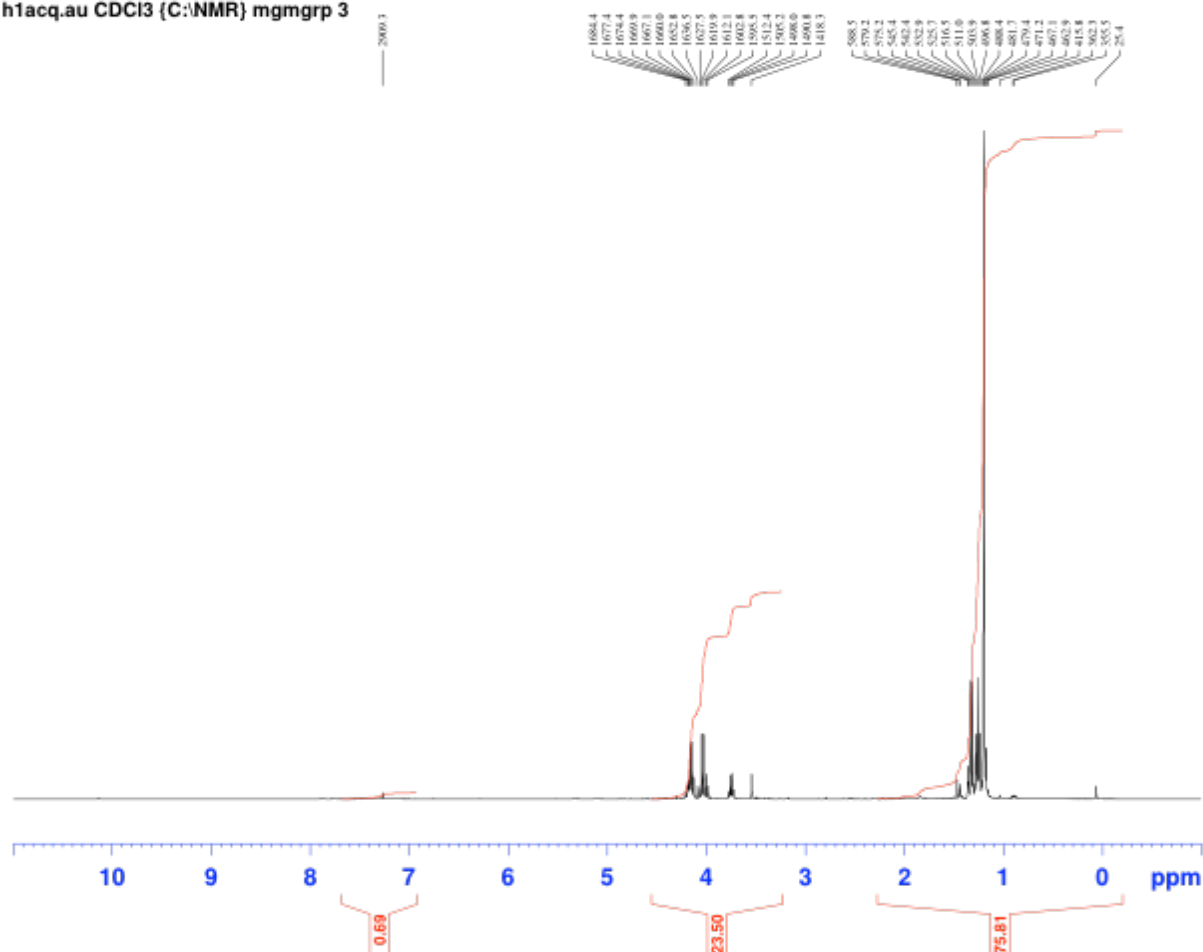

NMR@CHEM.OX

NAME Apr23-2010-3  
EXPNO 1  
PROCNO 1  
Date\_ 20100424  
Time 11.34  
INSTRUM av400  
PROBHD 5 mm QNP 1H/13  
PULPROG zgpg30  
TD 65536  
SOLVENT CDCl3  
NS 16  
DS 2  
SWH 8278.146 Hz  
FIDRES 0.126314 Hz  
AQ 3.9584243 sec  
RG 90.5  
DW 60.400 usec  
DE 7.50 usec  
TE 300.0 K  
D1 1.00000000 sec

===== CHANNEL f1 =====  
NUC1 1H  
P1 9.00 usec  
PL1 0.00 dB  
SFO1 400.2024714 MHz  
SI 32768  
SF 400.2000028 MHz  
WDW EM  
SSB 0  
LB 0.30 Hz  
GB 0  
PC 1.00

# Ethyl 4-(*tert*-butoxy)-2-methyl-3-oxobutanoate

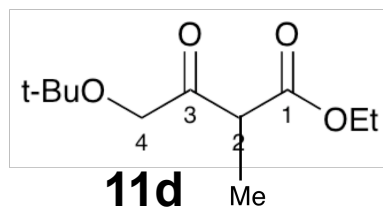

Instrument DQX400  
Chemist ykschau  
Group mgm  
SC 101 f1  
c13acq.au CDCl3 {C:NMR} mgmgrp 3

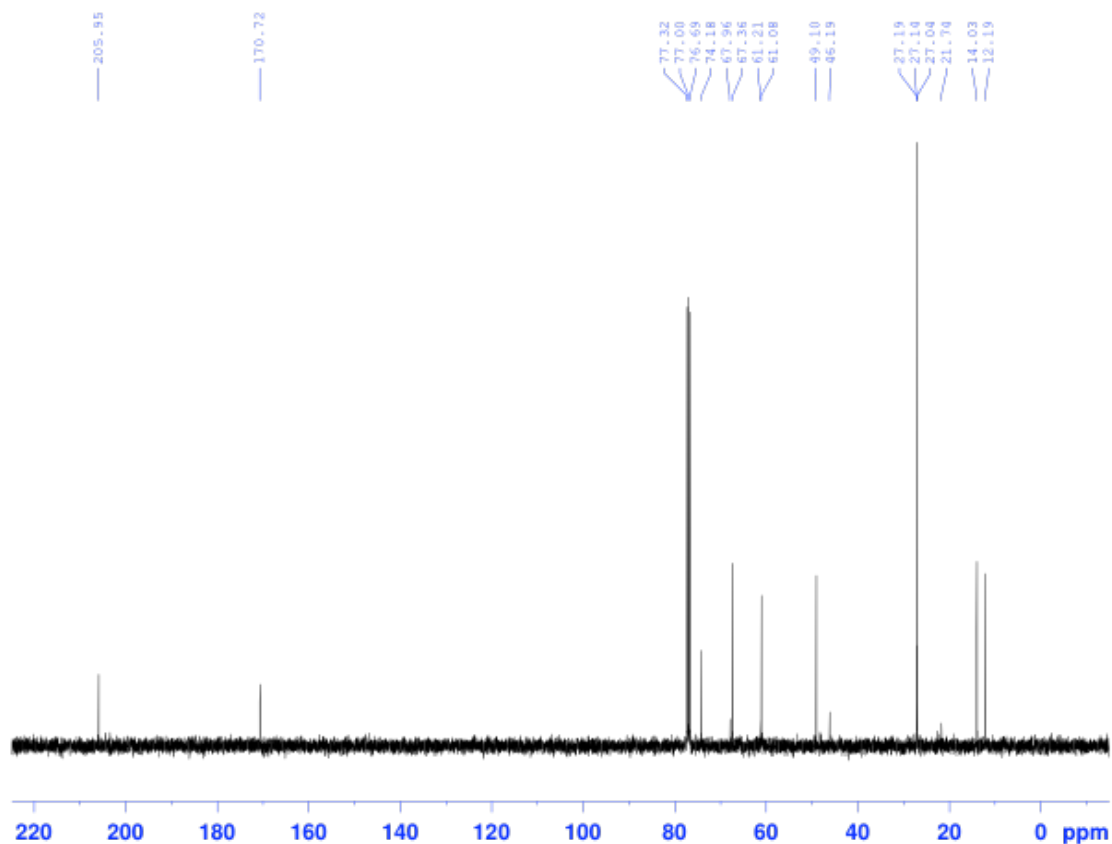

NMR@CHEM.OX

NAME Apr23-2010-3  
EXPNO 2  
PROCNO 1  
Date\_ 20100424  
Time 11.42  
INSTRUM av400  
PROBHD 5 mm QNP 1H/13  
PULPROG zgpg30  
TD 32768  
SOLVENT CDCl3  
NS 256  
DS 4  
SWH 26178.010 Hz  
FIDRES 0.798889 Hz  
AQ 0.6259188 sec  
RG 32768  
DM 19.100 usec  
DE 7.50 usec  
TE 300.0 K  
D1 1.00000000 sec  
D11 0.03000000 sec  
TD0 1

===== CHANNEL f1 =====  
NUC1 13C  
P1 9.50 usec  
PL1 0.00 dB  
SFO1 100.6403931 MHz

===== CHANNEL f2 =====  
CPDPRG2 waltz16  
NUC2 1H  
PCPD2 80.00 usec  
PL2 0.00 dB  
PL12 19.00 dB  
PL13 25.00 dB  
SFO2 400.2016008 MHz  
SI 32768  
SF 100.6303718 MHz  
WDM EM  
SSB 0  
LB 1.00 Hz  
GB 0  
PC 1.40

Instrument DQX400  
Chemist PJF  
Group MGM  
PF031  
h1acq.au CDC13 (C-13)

NMR1 mgmgrp 27

NMR@CHEM.OX

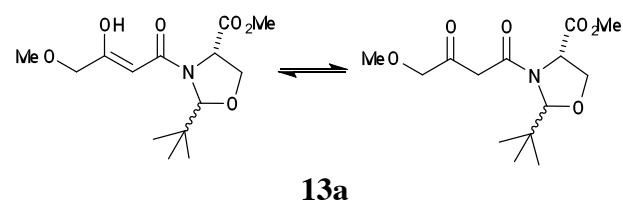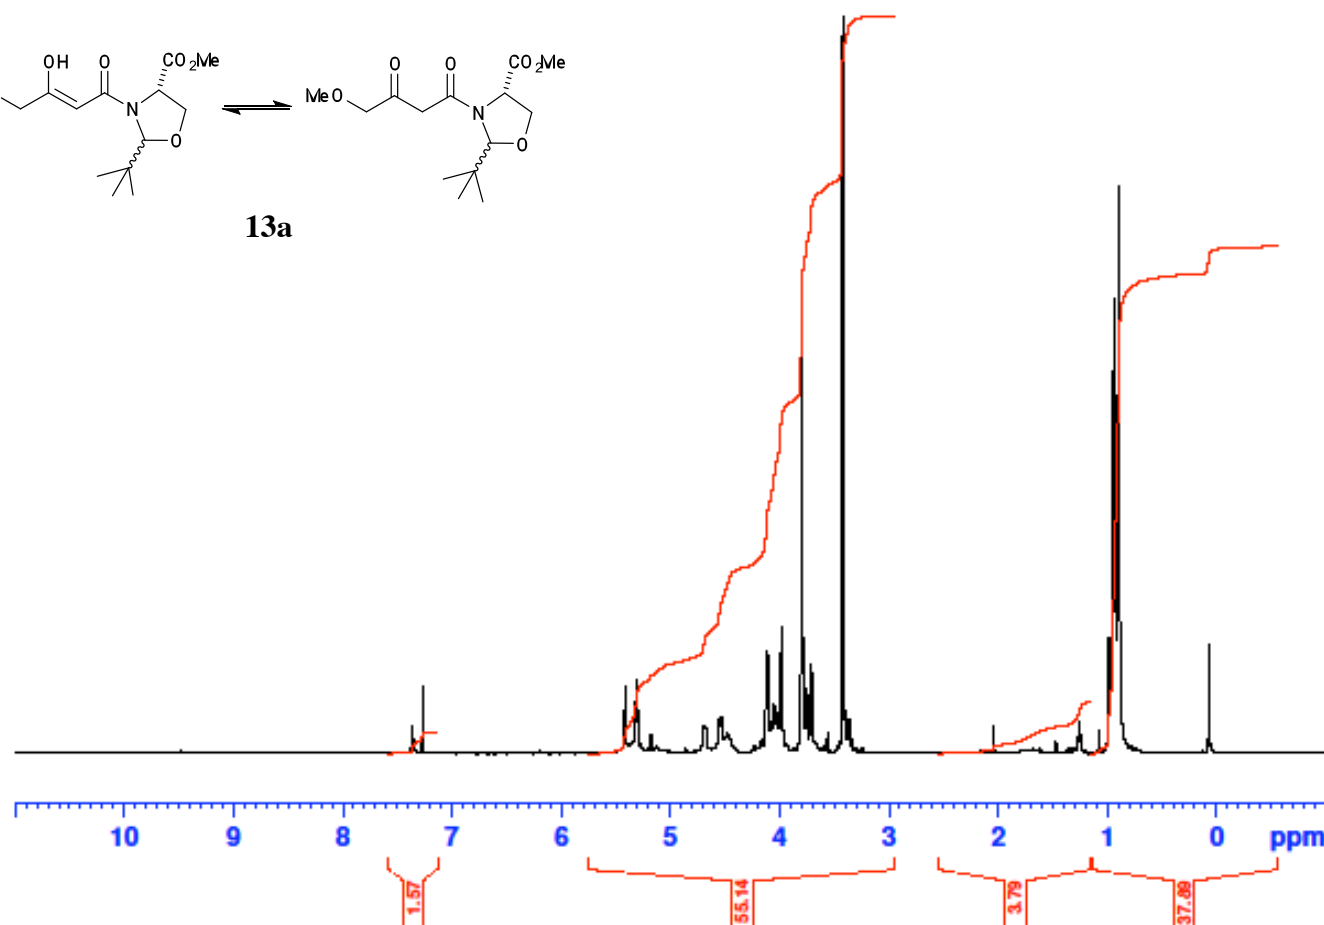

```

NAME      Mar18-2010-27
EXPNO     1
PROCNO    1
Date_     20100319
Time      1.31
INSTRUM   av400
PROBHD    5 mm QNP 1H/13
PULPROG   zg60
TD         65536
SOLVENT   CDC13
NS         16
DS         2
SWH        8278.146 Hz
FIDRES     0.126314 Hz
AQ         3.9584243 sec
RG         90.5
DW         60.400 usec
DE         7.50 usec
TE         300.0 K
D1         1.00000000 sec

===== CHANNEL f1 =====
NUC1       1H
P1         9.00 usec
PL1        0.00 dB
SFO1       400.2024714 MHz
SI         32768
SF         400.2000028 MHz
WDW        EM
SSB        0
LB         0.30 Hz
GB         0
PC         1.00
    
```

Instrument DQX400  
Chemist PJF  
Group MGM  
PF031  
c13acq.au CDCl3 [C:NMR] mgmgrp 27

NMR@CHEM.OX

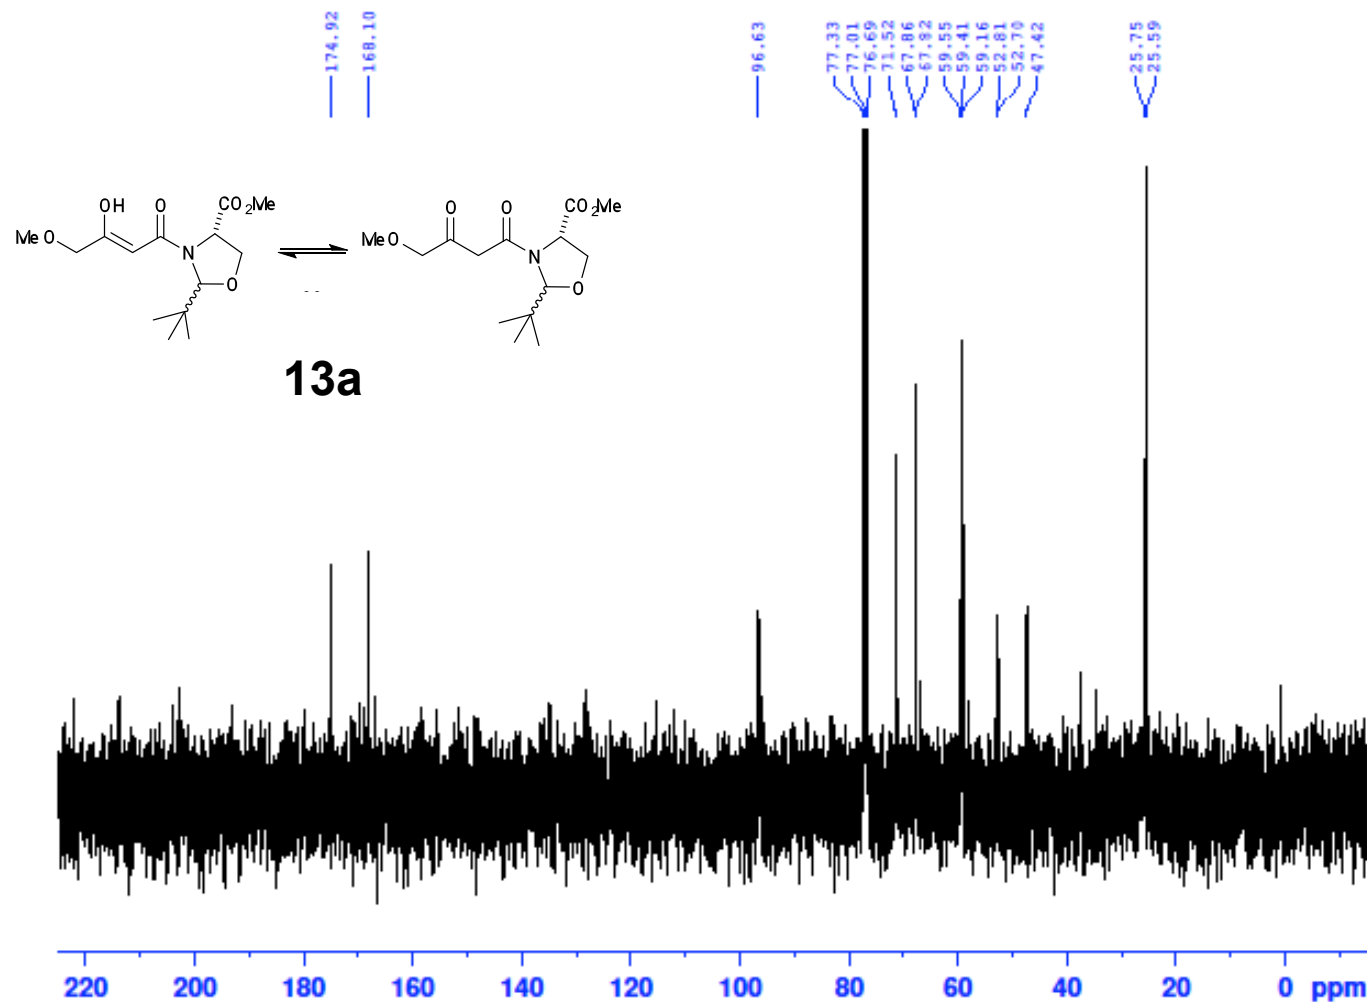

NAME Mar18-2010-27  
EXPNO 2  
PROCNO 1  
Date\_ 20100319  
Time 1.38  
INSTRUM av400  
PROBHD 5 mm QNP 1H/13  
PULPROG zgpg30  
TD 32768  
SOLVENT CDCl3  
NS 256  
DS 4  
SWH 26178.010 Hz  
FIDRES 0.798889 Hz  
AQ 0.6259188 sec  
RG 32768  
DW 19.100 usec  
DE 7.50 usec  
TE 300.0 K  
D1 1.00000000 sec  
D11 0.03000000 sec  
TD0 1

===== CHANNEL f1 =====  
NUC1 13C  
P1 9.50 usec  
PL1 0.00 dB  
SFO1 100.6403931 MHz

===== CHANNEL f2 =====  
CPDPRG2 waltz16  
NUC2 1H  
PCPD2 80.00 usec  
PL2 0.00 dB  
PL12 19.00 dB  
PL13 25.00 dB  
SFO2 400.2016008 MHz  
SI 32768  
SF 100.6303718 MHz  
WDW EM  
SSB 0  
LB 1.00 Hz  
GB 0  
PC 1.40

# (2*R*, 5*S*)-methyl 1'-(4'-(benzyloxy)-3'-oxobutanoyl)-2-(*tert*-butyl)-5-carboxylate oxazolidine

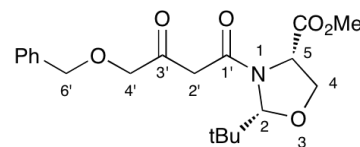

**13b**

Instrument DQX400  
Chemist ykschau  
Group mgm  
SC 079 (columned ii)  
h1acq.au CDCl<sub>3</sub> (C:NMR) mgmgrp 40

NMR@CHEM.OX

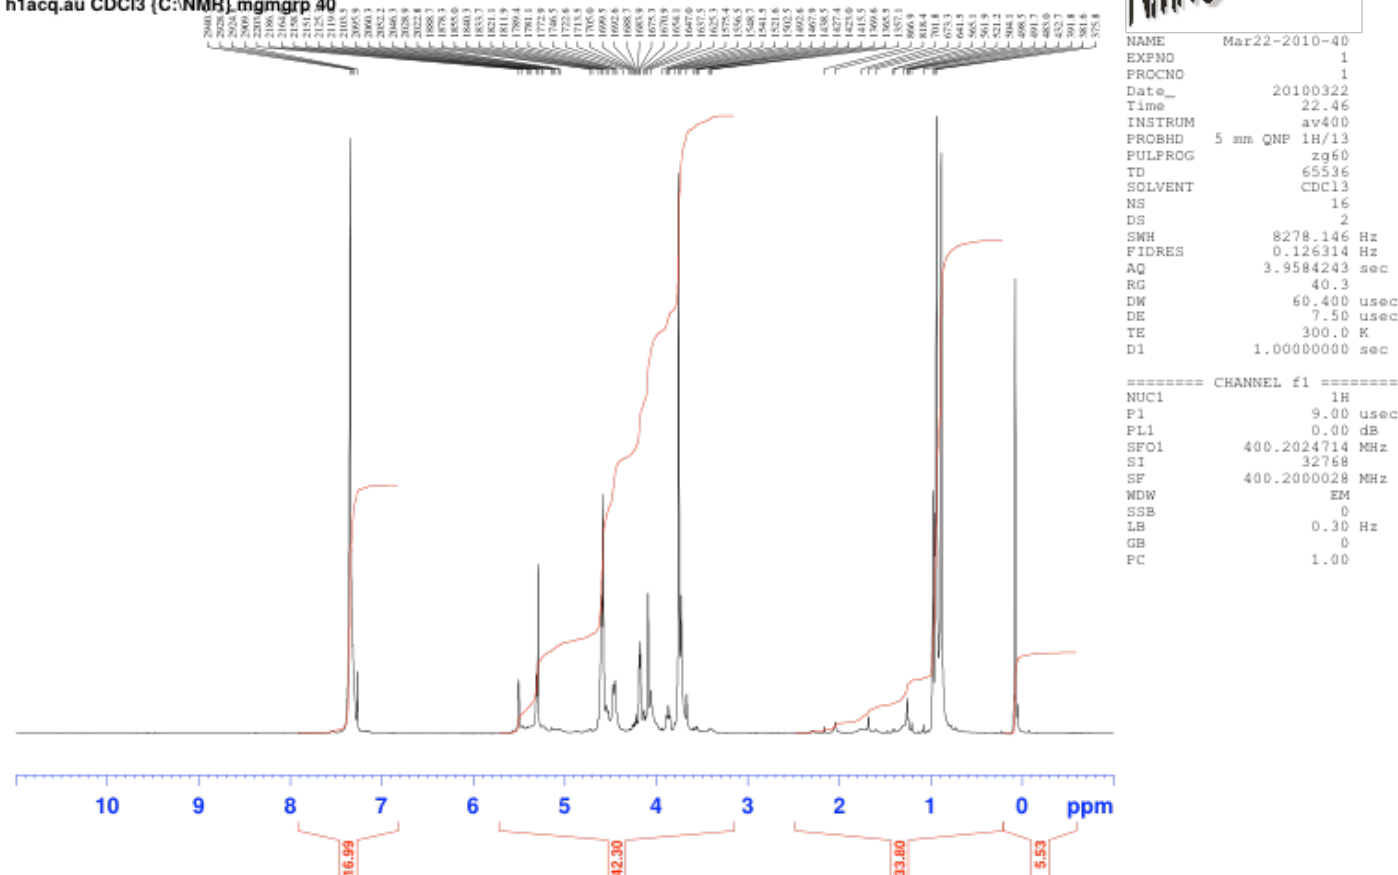

# (2R, 5S)-methyl 1'-(4'-(benzyloxy)-3'-oxobutanoyl)-2-(tert-butyl)-5-carboxylate oxazolidine

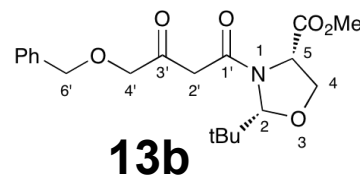

Instrument DQX400  
Chemist ykschau  
Group mgm  
SC 079 (columned ii)  
c13acq.au CDCl3 {C:NMR} mgmgrp 40

|                        |  |                 |
|------------------------|--|-----------------|
| NAME                   |  | Mar22-2010-40   |
| EXPNO                  |  | 2               |
| PROCNO                 |  | 1               |
| Date_                  |  | 20100322        |
| Time                   |  | 22.54           |
| INSTRUM                |  | av400           |
| PROBHD                 |  | 5 mm QNP 1H/13  |
| PULPROG                |  | zgpg30          |
| TD                     |  | 32768           |
| SOLVENT                |  | CDCl3           |
| NS                     |  | 256             |
| DS                     |  | 4               |
| SWH                    |  | 26178.010 Hz    |
| FIDRES                 |  | 0.798889 Hz     |
| AQ                     |  | 0.6259188 sec   |
| RG                     |  | 32768           |
| DW                     |  | 19.100 usec     |
| DE                     |  | 7.50 usec       |
| TE                     |  | 300.0 K         |
| D1                     |  | 1.00000000 sec  |
| D11                    |  | 0.03000000 sec  |
| TD0                    |  | 1               |
| ===== CHANNEL f1 ===== |  |                 |
| NUC1                   |  | 13C             |
| P1                     |  | 9.50 usec       |
| PL1                    |  | 0.00 dB         |
| SFO1                   |  | 100.6403931 MHz |
| ===== CHANNEL f2 ===== |  |                 |
| CPDPRG2                |  | waltz16         |
| NUC2                   |  | 1H              |
| PCPD2                  |  | 80.00 usec      |
| PL2                    |  | 0.00 dB         |
| PL12                   |  | 19.00 dB        |
| PL13                   |  | 25.00 dB        |
| SFO2                   |  | 400.2016008 MHz |
| SI                     |  | 32768           |
| SF                     |  | 100.6303718 MHz |
| WDM                    |  | EM              |
| SSB                    |  | 0               |
| LB                     |  | 1.00 Hz         |
| GB                     |  | 0               |
| PC                     |  | 1.40            |

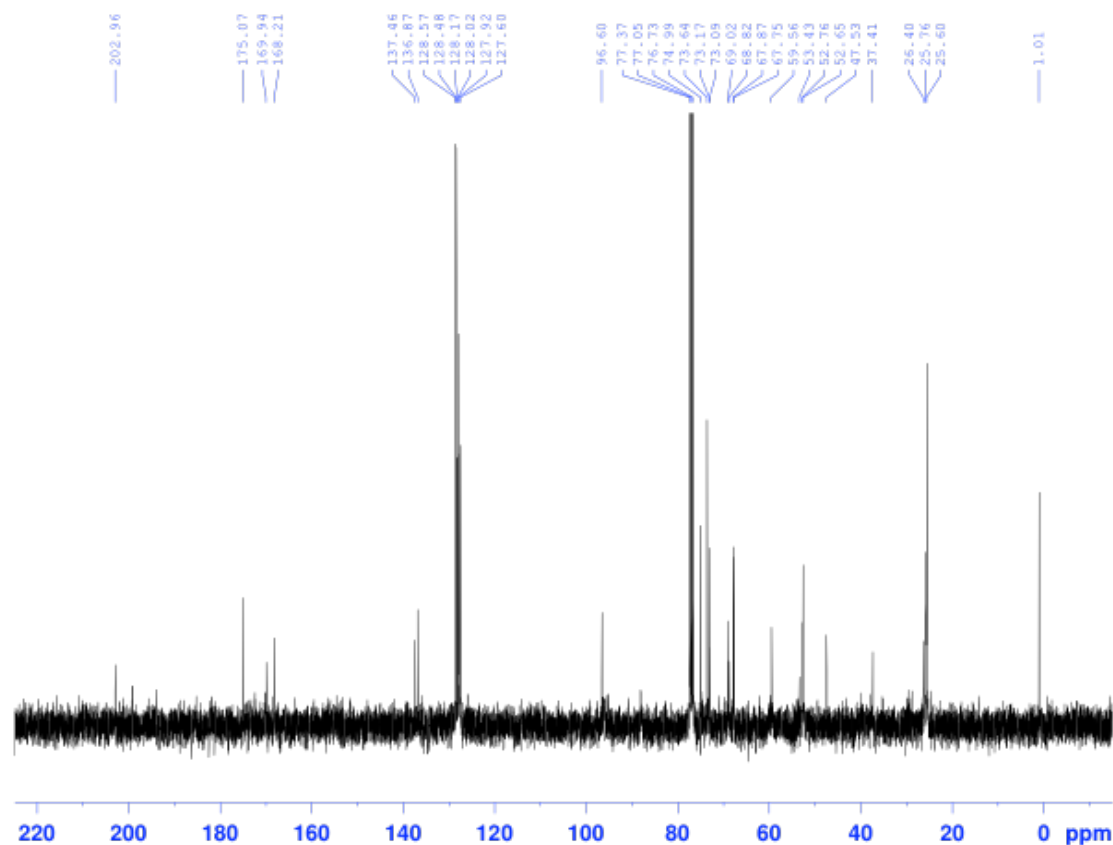

# (2R, 5S)-methyl-1'-(4'-(*tert*-butoxy)-3'-oxobutanoyl)-2-(*tert*-butyl)-5-carboxylate oxazolidine

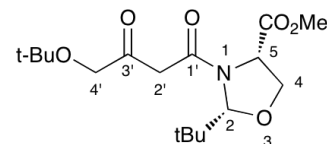

**13c**

Instrument DQX400  
Chemist ykschau  
Group mgm  
SC 091 columned  
h1acq.au CDCl3 (C:NMR) mgmgrp 11

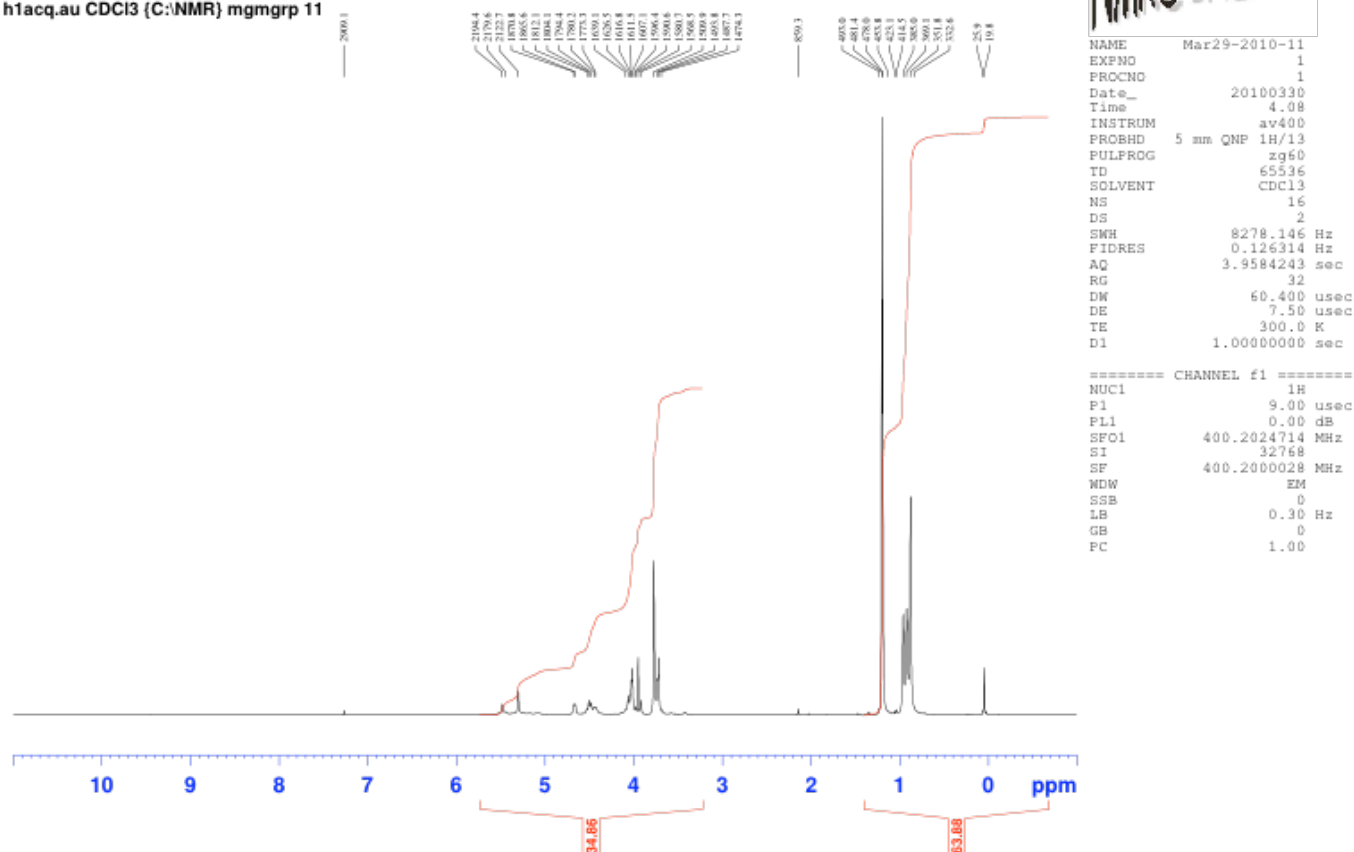

NAME Mar29-2010-11  
EXPNO 1  
PROCNO 1  
Date\_ 20100330  
Time 4.08  
INSTRUM av400  
PROBHD 5 mm QNP 1H/13  
PULPROG zgpg30  
TD 65536  
SOLVENT CDCl3  
NS 16  
DS 2  
SWH 8278.146 Hz  
FIDRES 0.126314 Hz  
AQ 3.9584243 sec  
RG 32  
DW 60.400 usec  
DE 7.50 usec  
TE 300.0 K  
D1 1.00000000 sec

===== CHANNEL f1 =====  
NUC1 1H  
P1 9.00 usec  
PL1 0.00 dB  
SFO1 400.2024714 MHz  
SI 32768  
SF 400.2000028 MHz  
WDW EM  
SSB 0  
LB 0.30 Hz  
GB 0  
PC 1.00

# (2R, 5S)-methyl-1'-(4'-(*tert*-butoxy)-3'-oxobutanoyl)-2-(*tert*-butyl)-5-carboxylate oxazolidine

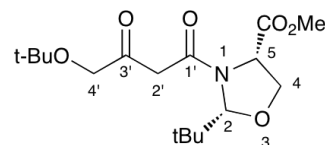

**13c**

Instrument DQX400  
Chemist ykschau  
Group mgm  
SC 091 columned  
c13acq.au CDCl<sub>3</sub> {C:NMR} mgmgrp 11

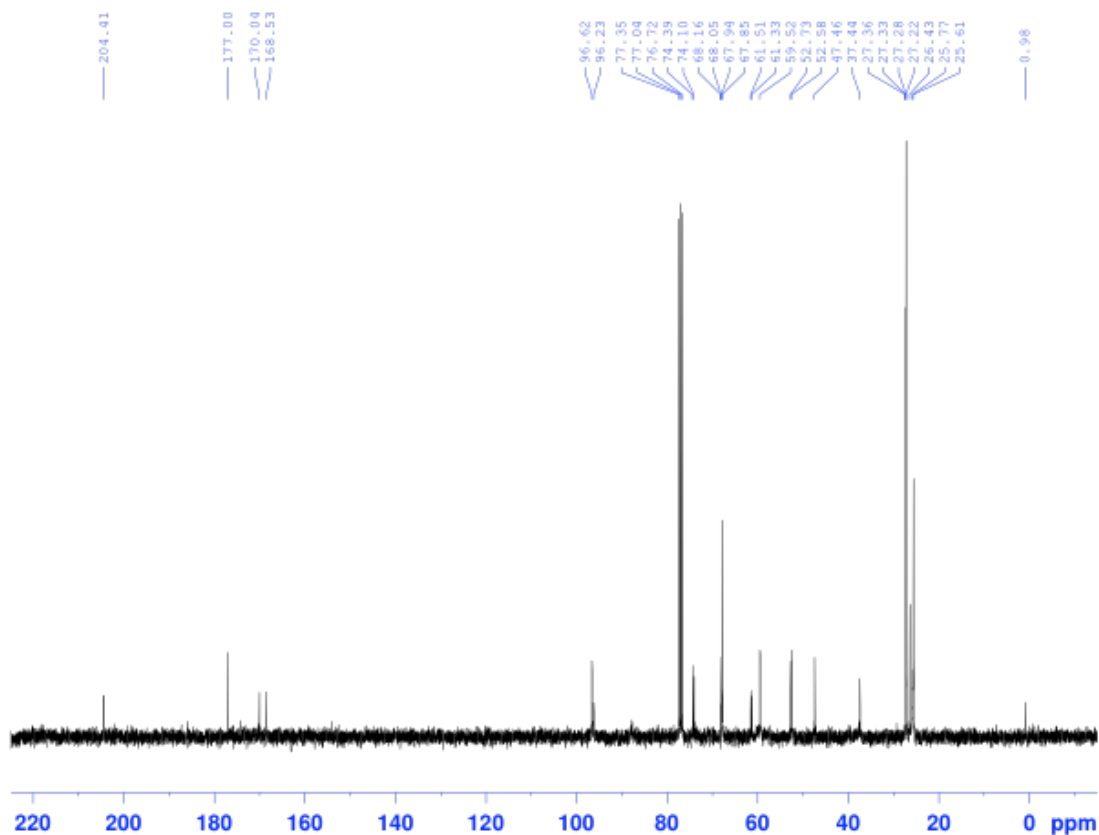

|                        |                   |
|------------------------|-------------------|
| NAME Mar29-2010-11     |                   |
| EXPNO                  | 2                 |
| PROCNO                 | 1                 |
| Date_                  | 20100330          |
| Time                   | 4.16              |
| INSTRUM                | av400             |
| PROBHD                 | 5 mm QNP 1H/13    |
| PULPROG                | zgpg30            |
| TD                     | 32768             |
| SOLVENT                | CDCl <sub>3</sub> |
| NS                     | 256               |
| DS                     | 4                 |
| SWH                    | 26178.010 Hz      |
| FIDRES                 | 0.798889 Hz       |
| AQ                     | 0.6259188 sec     |
| RG                     | 32768             |
| DW                     | 19.100 usec       |
| DE                     | 7.50 usec         |
| TE                     | 300.0 K           |
| D1                     | 1.00000000 sec    |
| D11                    | 0.03000000 sec    |
| TD0                    | 1                 |
| ===== CHANNEL f1 ===== |                   |
| NUC1                   | 13C               |
| P1                     | 9.50 usec         |
| PL1                    | 0.00 dB           |
| SFO1                   | 100.6403931 MHz   |
| ===== CHANNEL f2 ===== |                   |
| CPDPRG2                | waltz16           |
| NUC2                   | 1H                |
| PCPD2                  | 80.00 usec        |
| PL2                    | 0.00 dB           |
| PL12                   | 19.00 dB          |
| PL13                   | 25.00 dB          |
| SFO2                   | 400.2016008 MHz   |
| SI                     | 32768             |
| SF                     | 100.6303718 MHz   |
| WDM                    | EM                |
| SSB                    | 0                 |
| LB                     | 1.00 Hz           |
| GB                     | 0                 |
| PC                     | 1.40              |



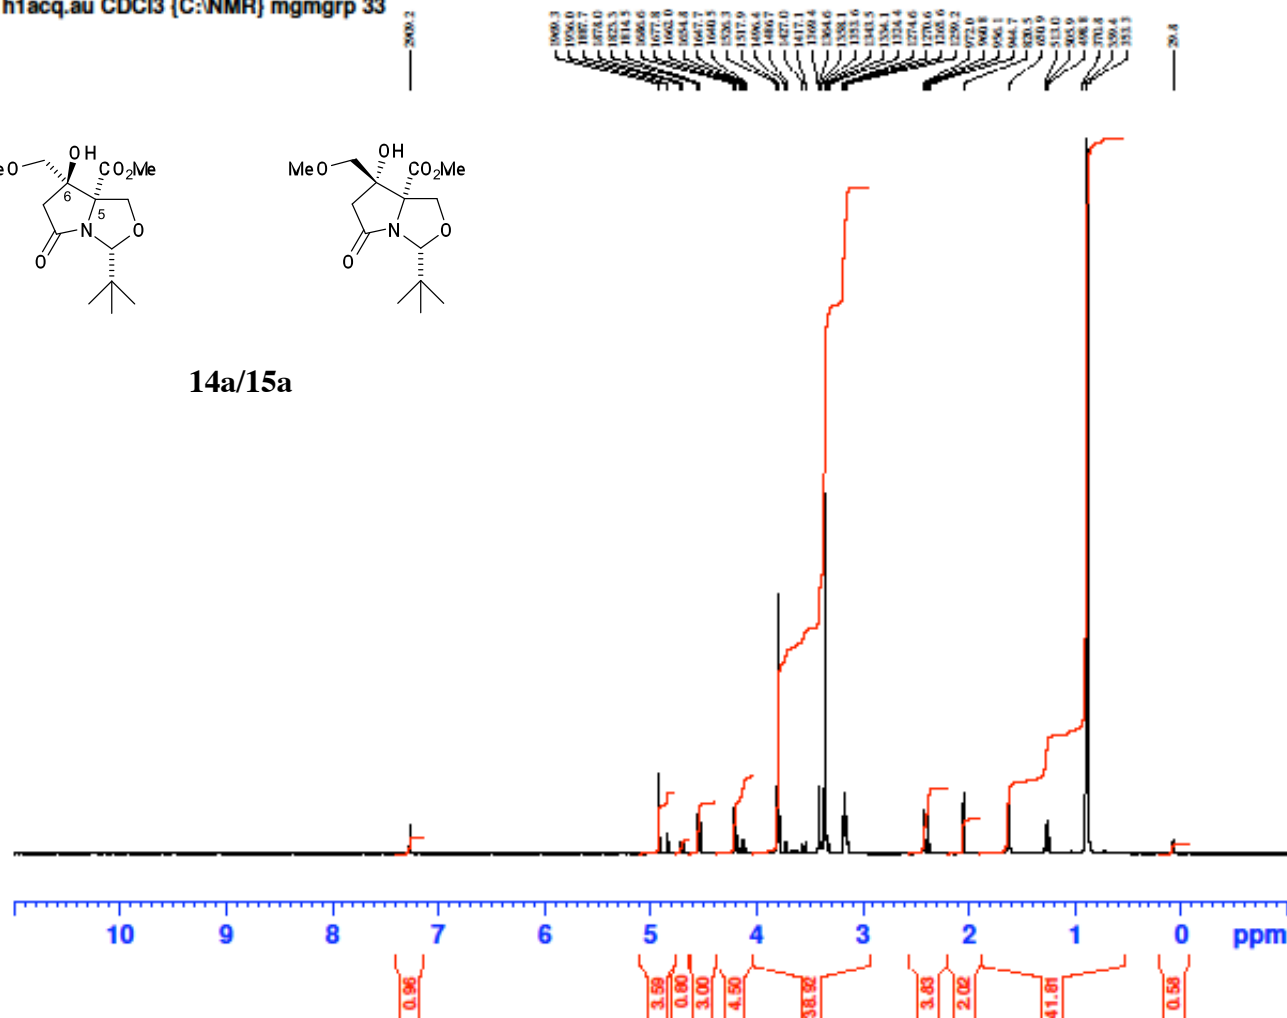

Instrument DQX400  
Chemist PJF  
Group MGM  
PF032  
c13acq.au CDCl3 [C:NMR] mgmgrp 33

NMR@CHEM.OX

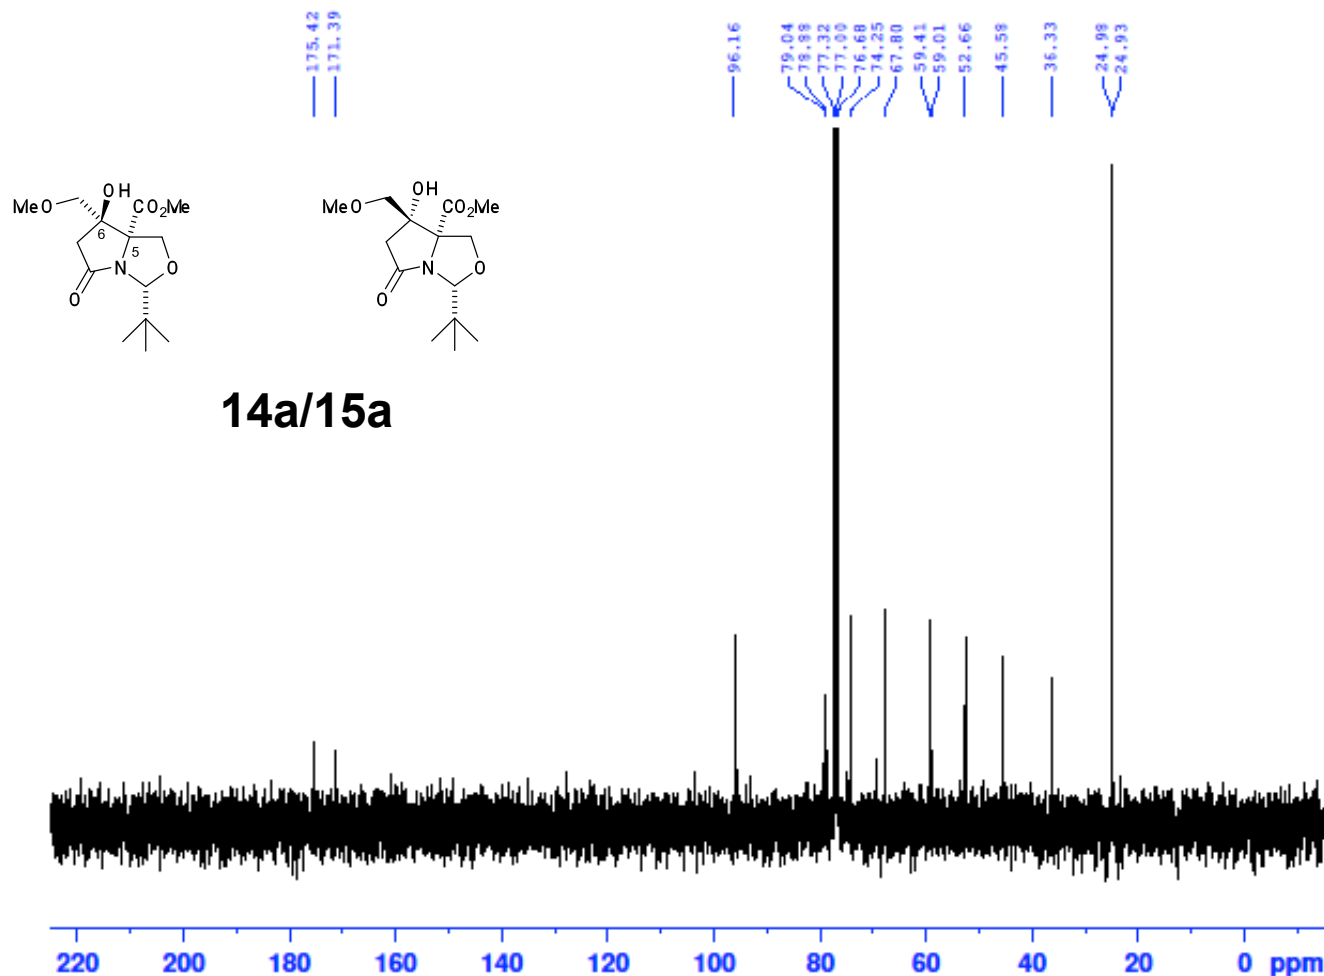

NAME Mar24-2010-33  
EXPNO 2  
PROCNO 1  
Date\_ 20100325  
Time 12.46  
INSTRUM av400  
PROBHD 5 mm QNP 1H/13  
PULPROG zgpg30  
TD 32768  
SOLVENT CDCl3  
NS 256  
DS 4  
SWH 26178.010 Hz  
FIDRES 0.798889 Hz  
AQ 0.6259188 sec  
RG 32768  
DW 19.100 usec  
DE 7.50 usec  
TE 300.0 K  
D1 1.00000000 sec  
D11 0.03000000 sec  
TD0 1

===== CHANNEL f1 =====  
NUC1 13C  
P1 9.50 usec  
PL1 0.00 dB  
SFO1 100.6403931 MHz

===== CHANNEL f2 =====  
CPDPRG2 waltz16  
NUC2 1H  
PCPD2 80.00 usec  
PL2 0.00 dB  
PL12 19.00 dB  
PL13 25.00 dB  
SFO2 400.2016008 MHz  
SI 32768  
SF 100.6303718 MHz  
WDW EM  
SSB 0  
LB 1.00 Hz  
GB 0  
PC 1.40

Instrument DQX400

Chemist PA

Group MGM

PA178B

h1acq.au CDCl<sub>3</sub> (E:NMR2011).mgmgrp 11

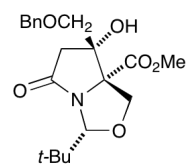

**14b**

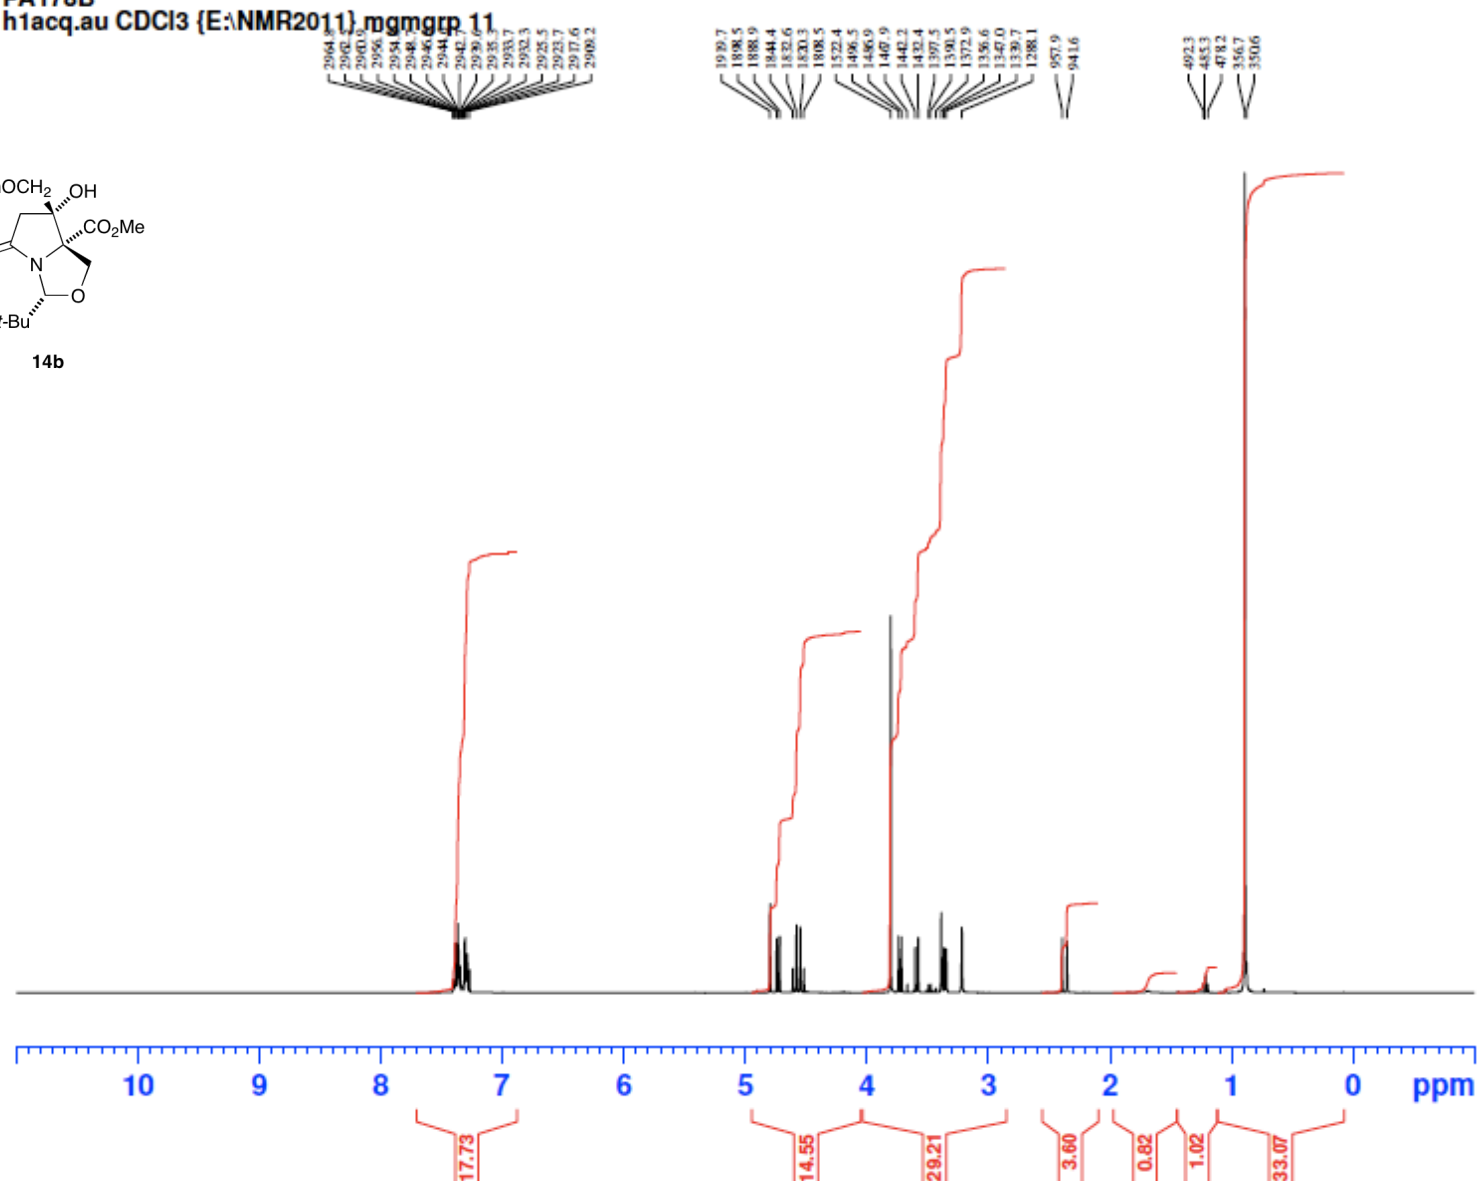

Instrument DQX400  
Chemist PA  
Group MGM  
PA178B  
c13acq.au CDCl<sub>3</sub> {E:\NMR2011} mgmgrp 11

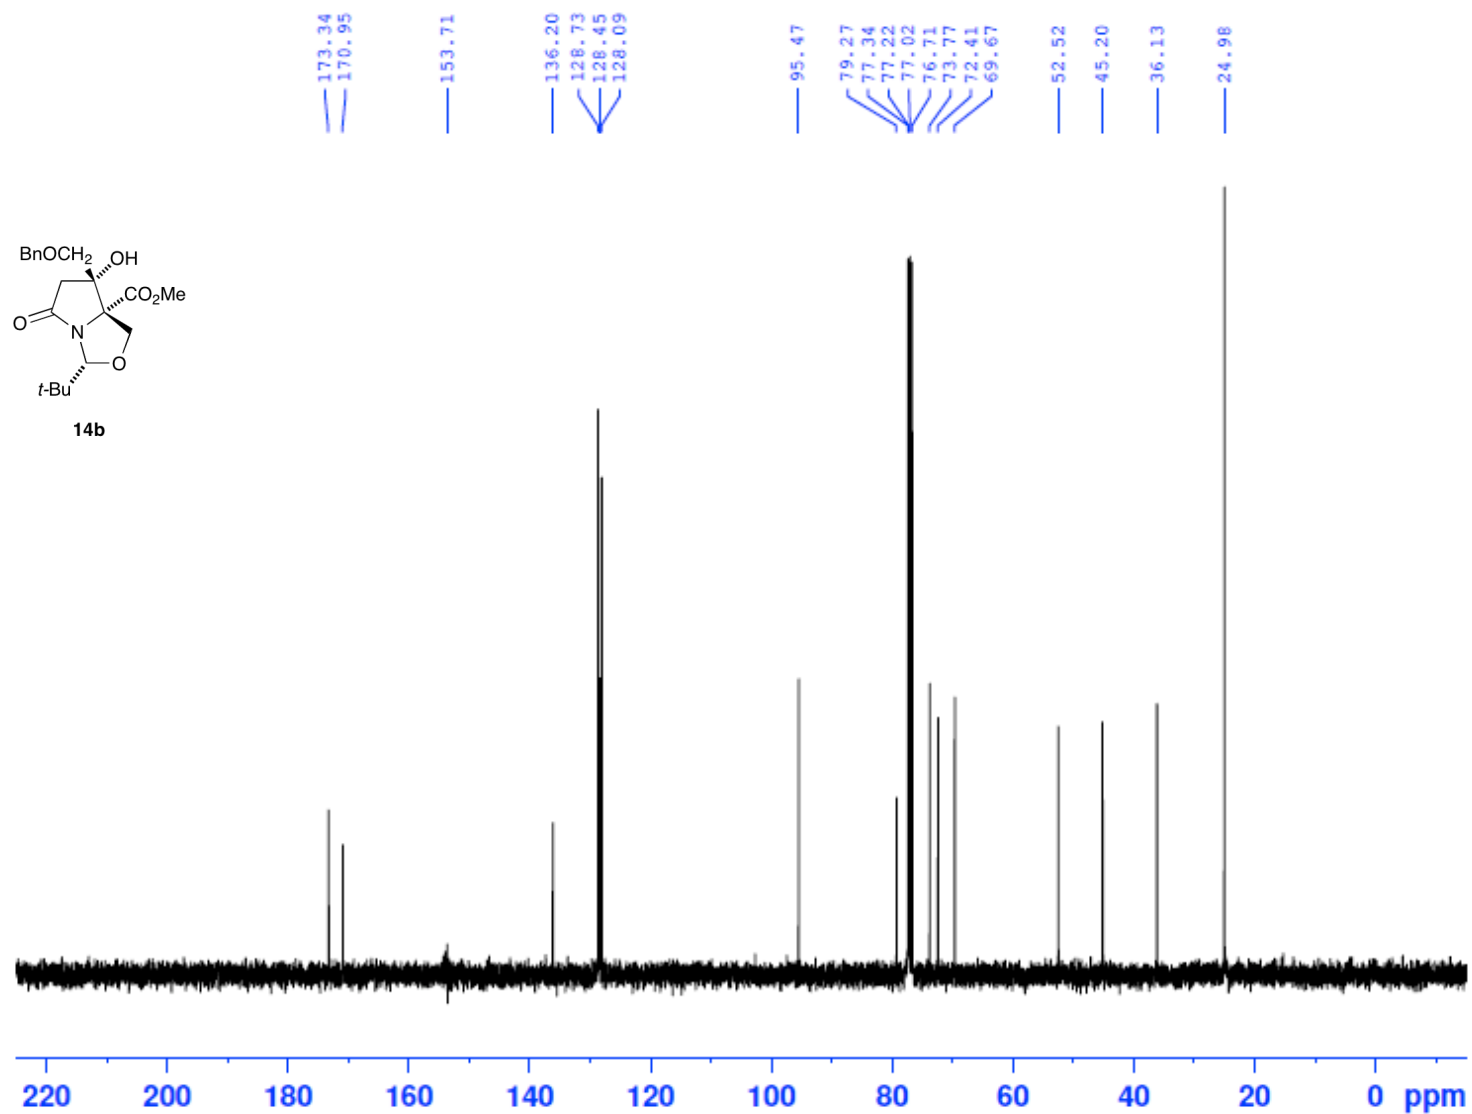

# (2R, 5R, 6S)-1-Aza-2-(*tert*-butyl)-6-hydroxy-6-(*tert*-butoxymethyl)-5-methoxycarbonyl-3-oxabicyclo[3.3.0]octane

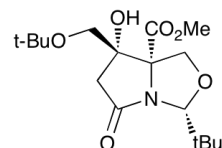

**14c**

Instrument DQX400  
Chemist ykschau  
Group mgm  
SC 094 (f2) columned  
h1acq.au CDCl3 (C:\NMR) mgmgrp 35

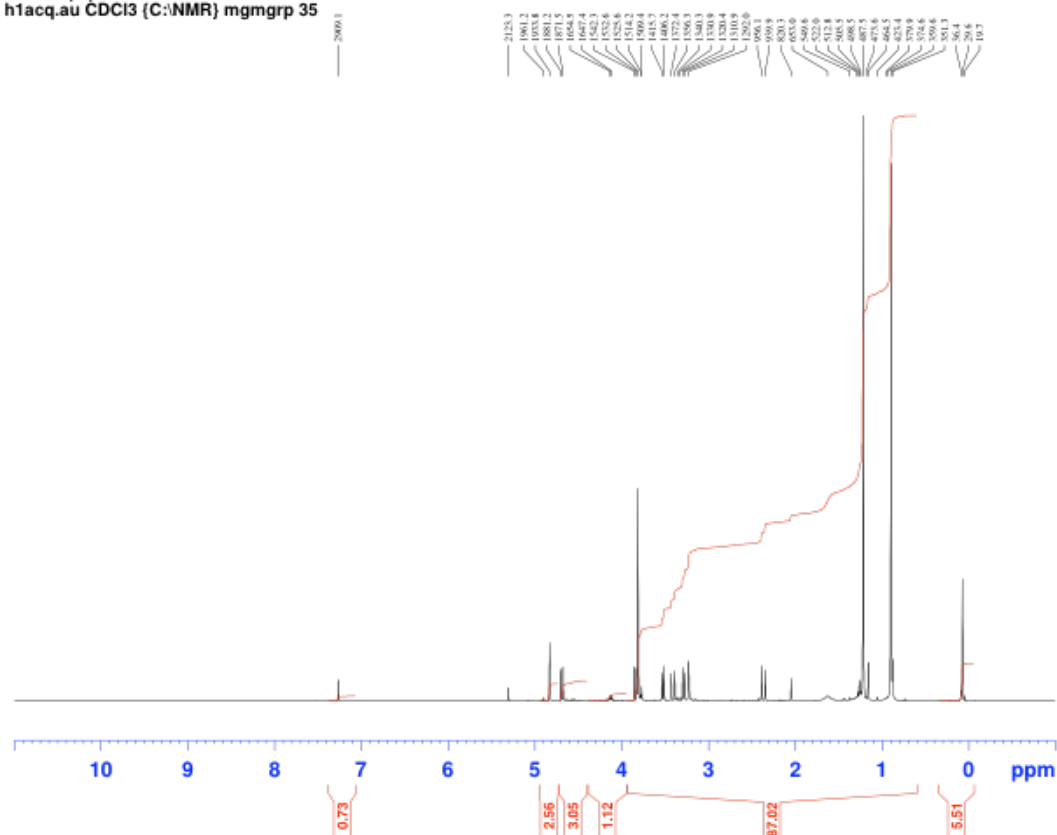

**NMR@CHEM.OX**

```

NAME      Apr19-2010-35
EXPNO     1
PROCNO    1
Date_     20100420
Time      15.18
INSTRUM   av400
PROBHD    5 mm QNP 1H/13
PULPROG   zgpg30
TD         65536
SOLVENT   CDCl3
NS         16
DS         2
SWH        8278.146 Hz
FIDRES     0.126314 Hz
AQ         3.9584243 sec
RG         181
DM         60.400 usec
DE         7.50 usec
TE         300.0 K
D1         1.00000000 sec

===== CHANNEL f1 =====
NUC1       1H
P1         9.00 usec
PL1        0.00 dB
SFO1       400.2024714 MHz
SI         32768
SF         400.2000028 MHz
WDW        EM
SSB        0
LB         0.30 Hz
GB         0
PC         1.00
    
```

Instrument DQX400

Chemist PA

Group MGM

PA135

h1acq.au CDCl<sub>3</sub> {C:NMR} mgmgrp 17

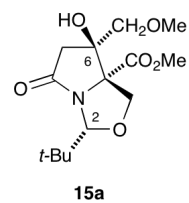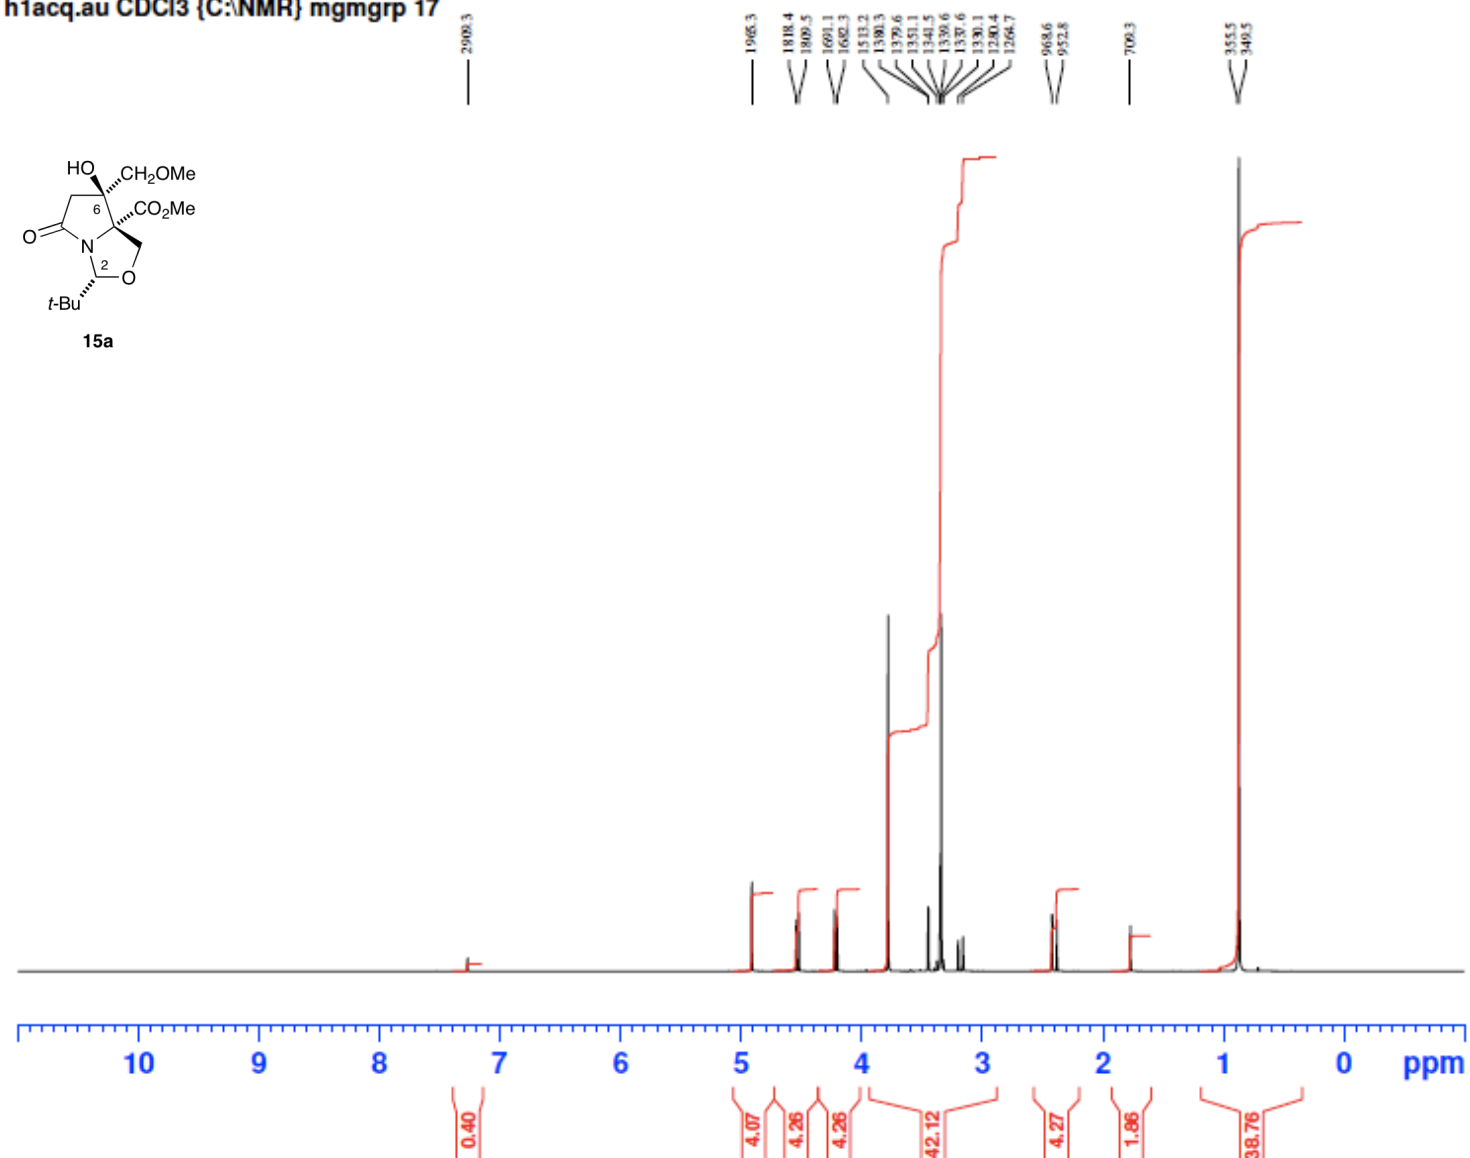

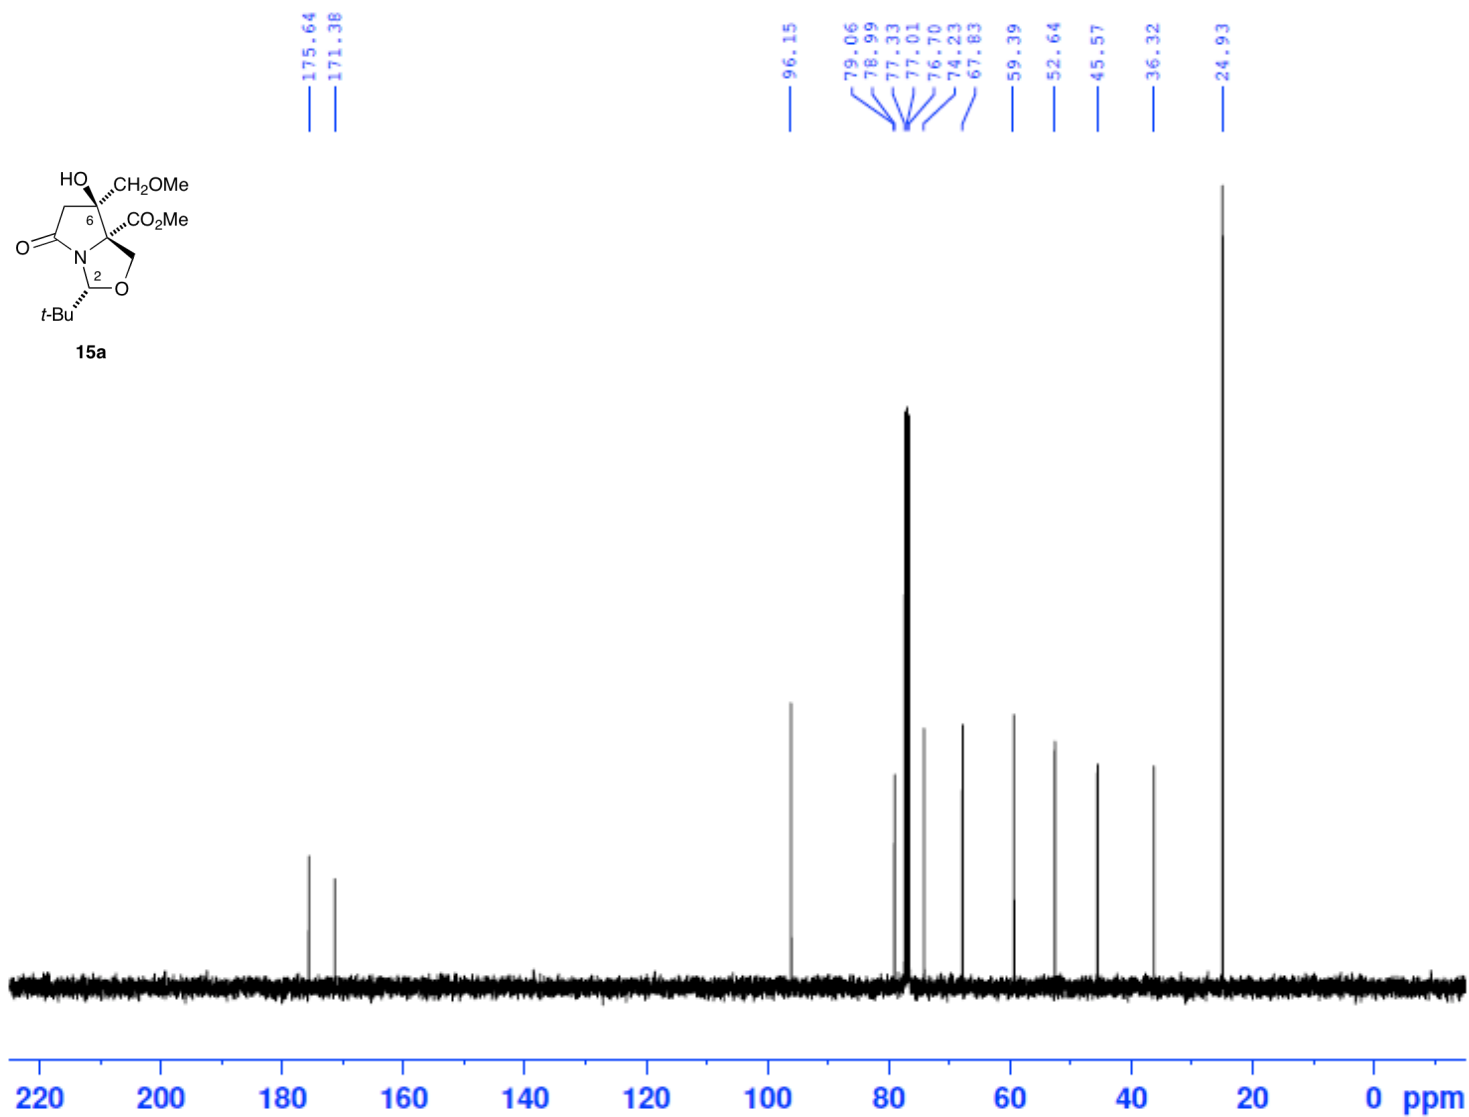

Instrument DQX400

Chemist PA

Group MGM

PA178A

h1acq.au CDCl<sub>3</sub> {C:NMR} mgmgrp 8

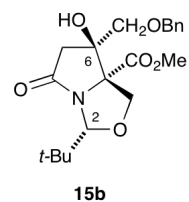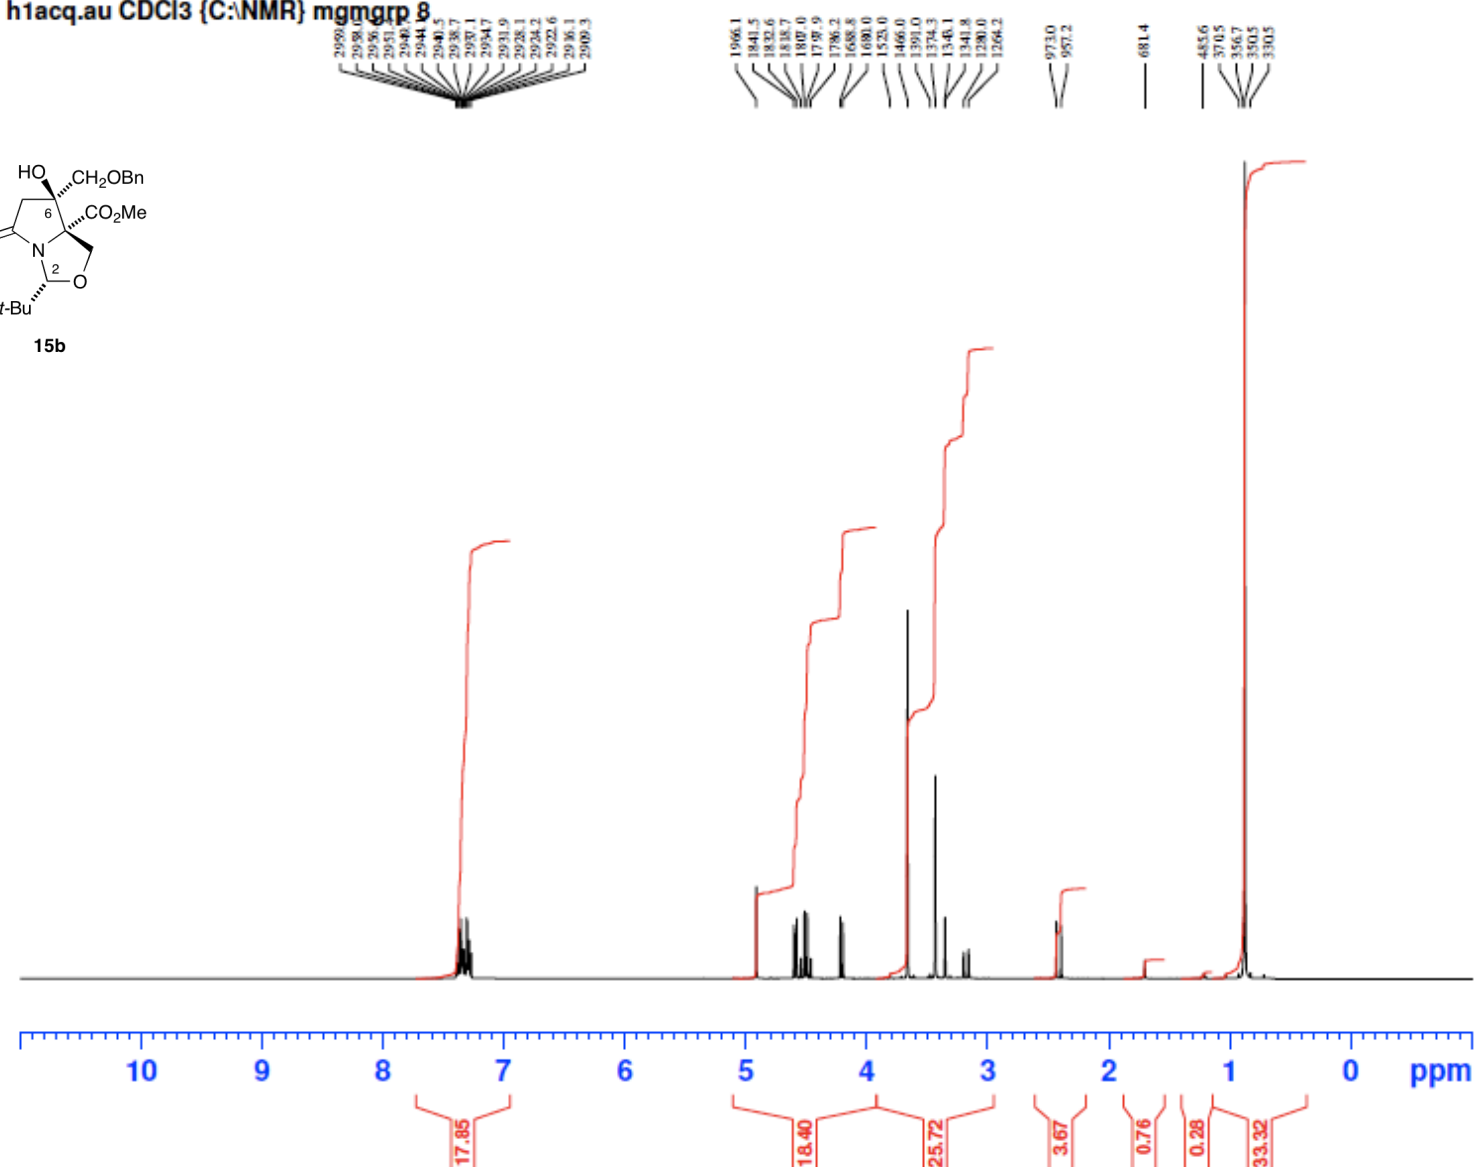



Instrument DQX400  
Chemist PA  
Group MGM  
PA178A  
c13acq.au CDCl<sub>3</sub> {C:\NMR} mgmgrp 8

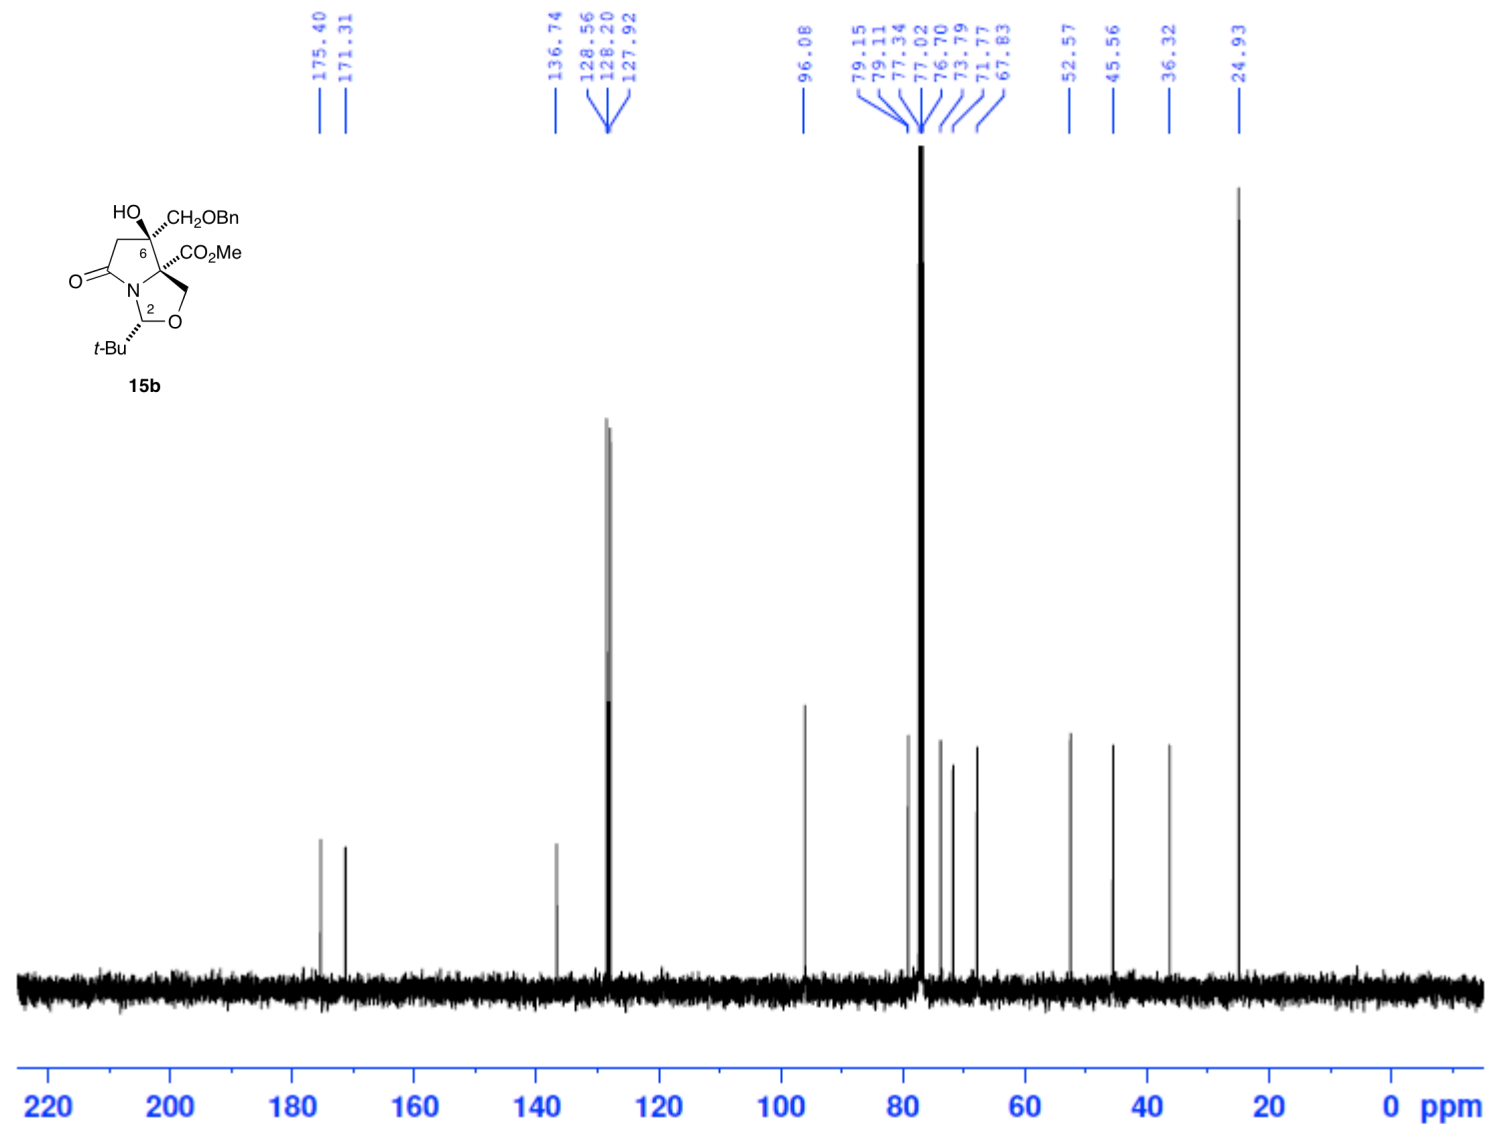

**(2*R*, 5*R*, 6*R*)-1-Aza-2-(*tert*-butyl)-6-hydroxy-6-(*tert*-butoxymetyl)-5-methoxycarbonyl-3-oxabicyclo[3.3.0]octane**

# (2R, 5R, 6R)-1-Aza-2-(*tert*-butyl)-6-hydroxy-6-(*tert*-butoxymethyl)-5-methoxycarbonyl-3-oxabicyclo[3.3.0]octane

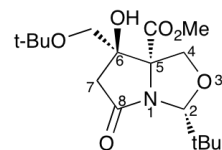

**15c**

Instrument DQX400  
Chemist ykschau  
Group mgm  
SC 094 (f1) columned  
c13acq.au CDCl3 (C:NMR) mgmgrp 34

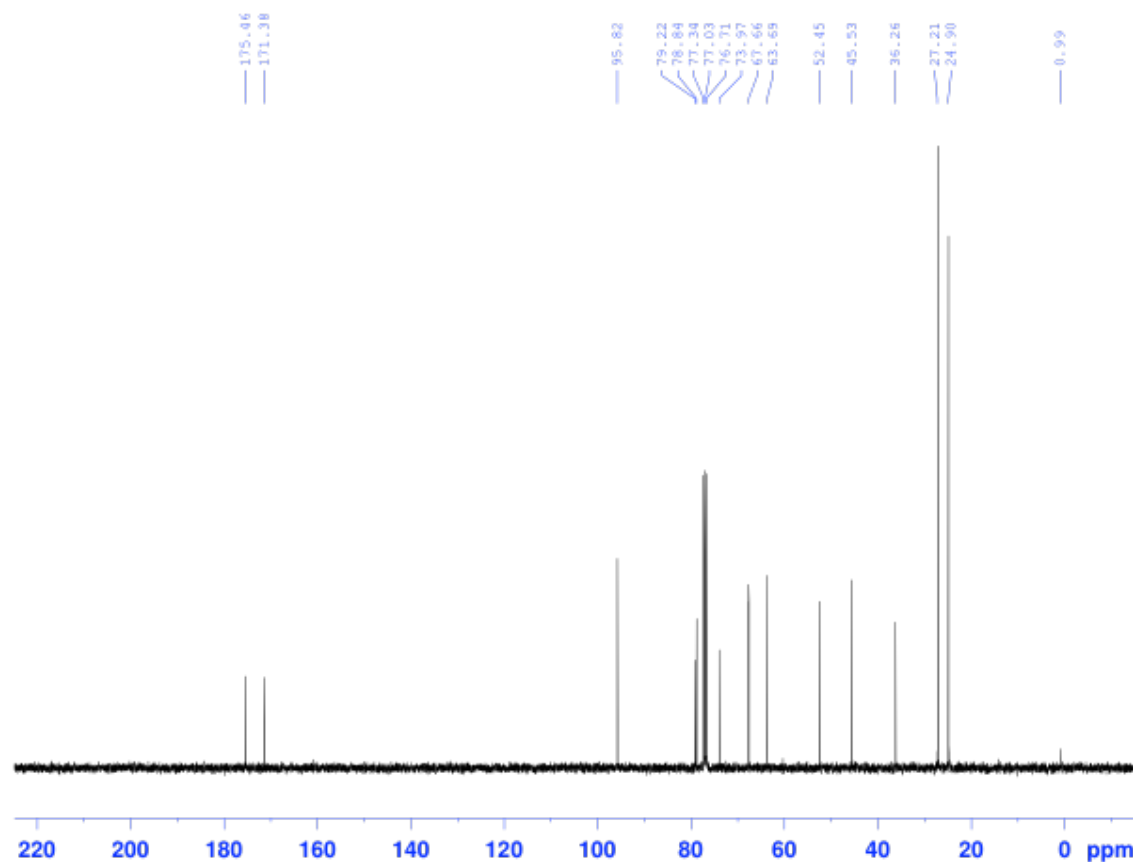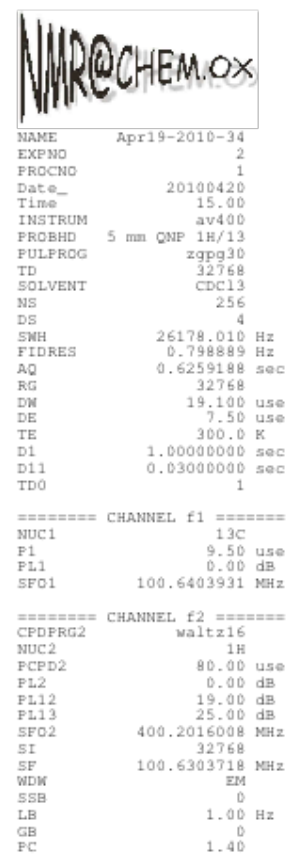

Instrument DQX400  
Chemist PJF  
Group MGM  
PF036

h1acq au MeOD (C: NMR) mgmgrp 32

NMR@CHEM.OX

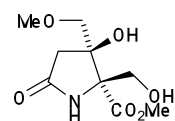

16/17a

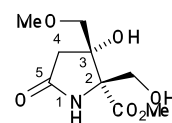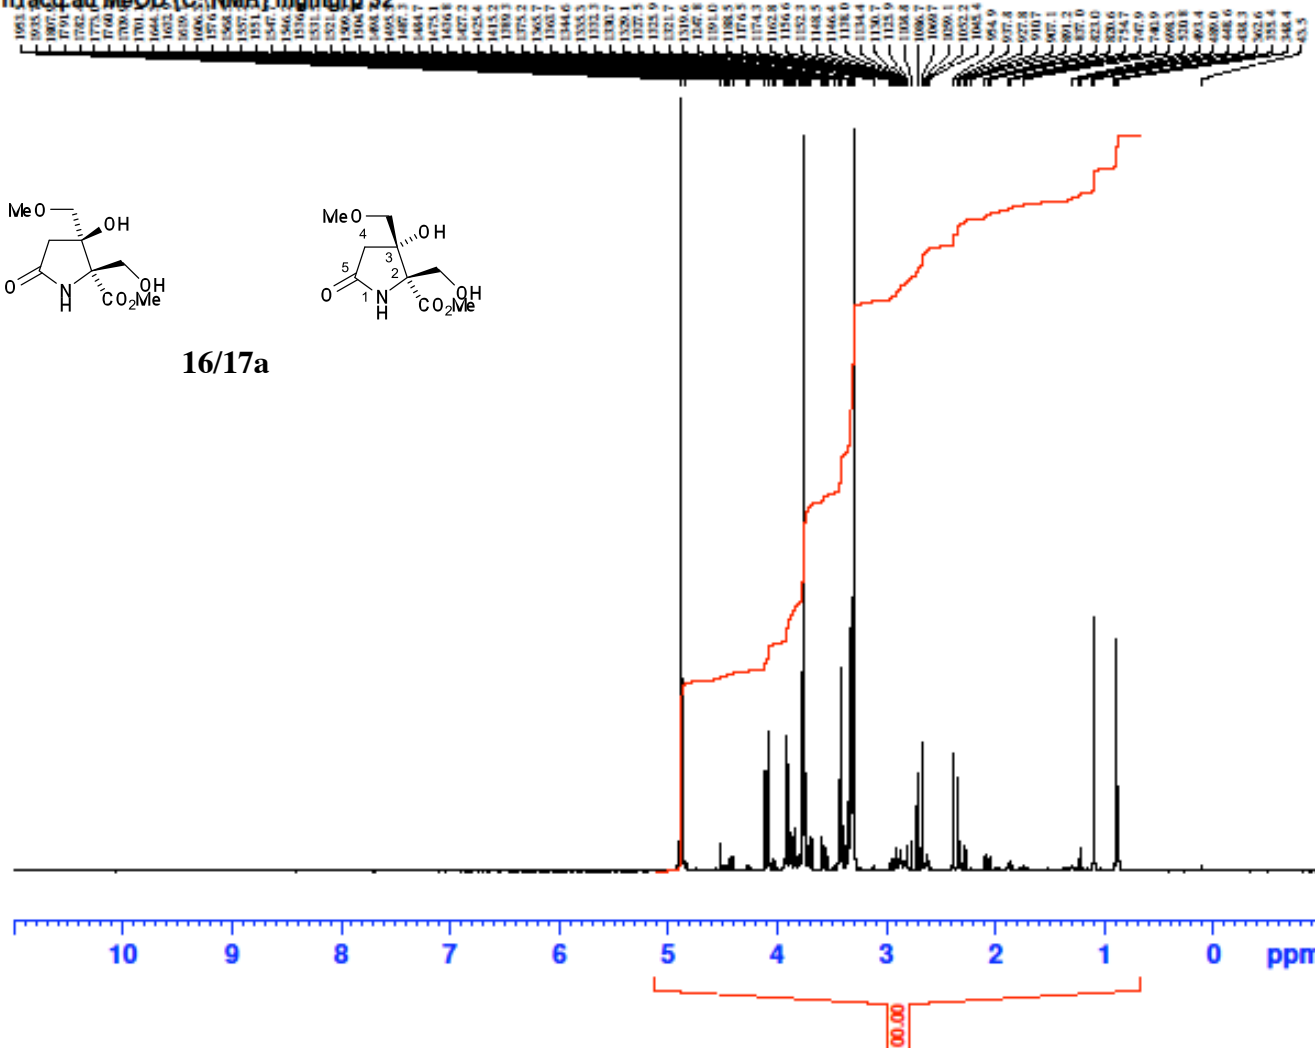

```

NAME      Apr30-2010-32
EXPNO     1
PROCNO    1
Date_     20100501
Time      6.53
INSTRUM   av400
PROBHD    5 mm QNP 1H/13
PULPROG   zgpg30
TD         65536
SOLVENT   MeOD
NS         16
DS         2
SWH        8278.146 Hz
FIDRES     0.126314 Hz
AQ         3.9584243 sec
RG         128
DW         60.400 usec
DE         7.50 usec
TE         300.0 K
D1         1.00000000 sec

===== CHANNEL f1 =====
NUC1       1H
P1         9.00 usec
PL1        0.00 dB
SFO1       400.2024714 MHz
SI         32768
SF         400.2000000 MHz
WDW        EM
SSB        0
LB         0.30 Hz
GB         0
PC         1.00
    
```

# Methyl 2-hydroxymethyl-3-hydroxy-3-(benzyloxymethyl) pyroglutamate and 2-amino-2-(methoxycarbonyl)-3-hydroxy-3-(benzyloxymethyl)- $\delta$ -lactone

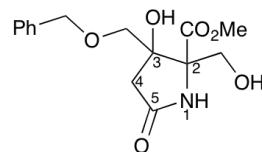

**17b**

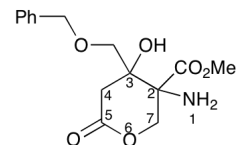

Instrument DQX400  
Chemist ykschau  
Group mgm  
SC114 (iii)  
h1acq.au D2O (C:NMR) mgmgrp 29

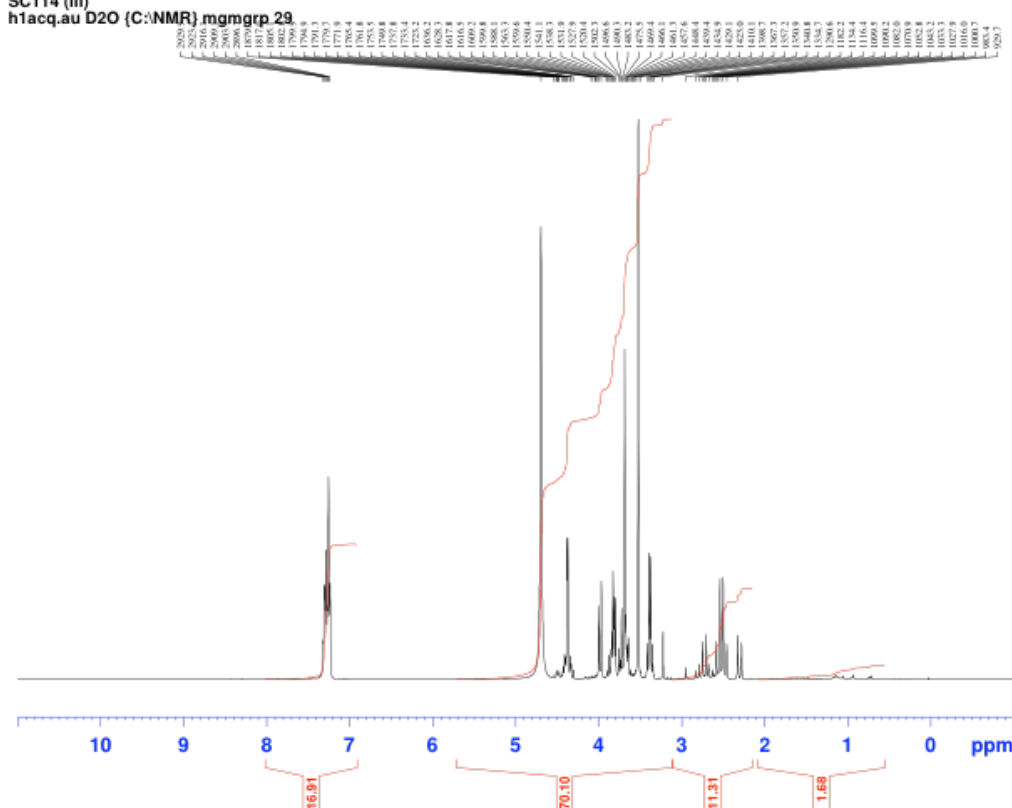

**NMR@CHEM.OX**

|         |                |
|---------|----------------|
| NAME    | May13-2010-29  |
| EXPNO   | 1              |
| PROCNO  | 1              |
| Date_   | 20100514       |
| Time    | 6.43           |
| INSTRUM | av400          |
| PROBHD  | 5 mm QNP 1H/13 |
| PULPROG | zgpg30         |
| TD      | 65536          |
| SOLVENT | D2O            |
| NS      | 16             |
| DS      | 2              |
| SWH     | 8270.146 Hz    |
| FIDRES  | 0.126314 Hz    |
| AQ      | 3.9584243 sec  |
| RG      | 90.5           |
| DW      | 60.400 usec    |
| DE      | 7.50 usec      |
| TE      | 300.0 K        |
| D1      | 1.00000000 sec |

===== CHANNEL f1 =====

|      |                 |
|------|-----------------|
| NUC1 | 1H              |
| P1   | 9.00 usec       |
| PL1  | 0.00 dB         |
| SFO1 | 400.2024714 MHz |
| SI   | 32768           |
| SF   | 400.2000000 MHz |
| WDW  | EM              |
| SSB  | 0               |
| LB   | 0.30 Hz         |
| GB   | 0               |
| PC   | 1.00            |

# Methyl 2-hydroxymethyl-3-hydroxy-3-(benzyloxymethyl) pyroglutamate and 2-amino-2-(methoxycarbonyl)-3-hydroxy-3-(benzyloxymethyl)- $\delta$ -lactone

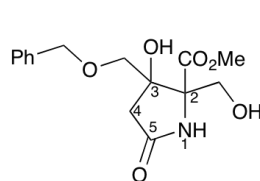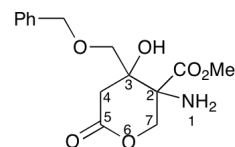

**17b**

Instrument DQX400  
Chemist ykschau  
Group mgm  
SC114 (iii)  
c13acq.au D2O (C:NMR) mgmgrp 29

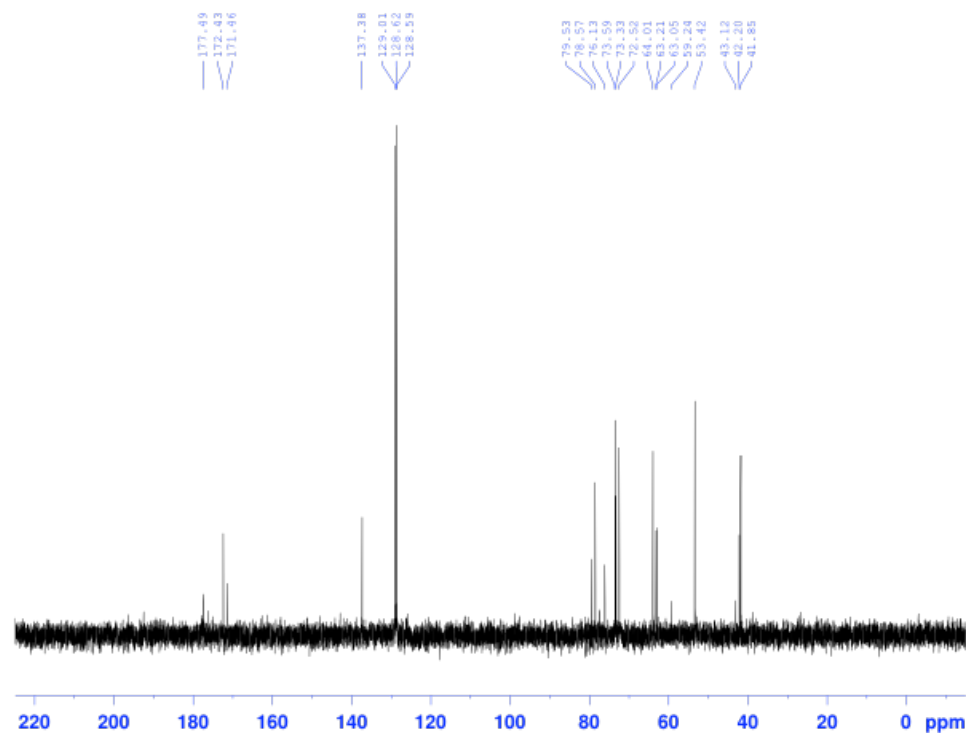

**NMR@CHEM.OX**

```

NAME          May13-2010-29
EXPNO          2
PROCNO         1
Date_          20100514
Time           6.51
INSTRUM        av400
PROBHD         5 mm QNP 1H/13
PULPROG        zgpg30
TD             32768
SOLVENT        D2O
NS             256
DS             4
SWH            26178.010 Hz
FIDRES         0.798889 Hz
AQ            0.6259188 sec
RG            32768
DM            19.100 usec
DE            7.50 usec
TE            300.0 K
D1            1.00000000 sec
D11           0.03000000 sec
TD0           1

===== CHANNEL f1 =====
NUC1           13C
P1            9.50 usec
PL1           0.00 dB
SFO1          100.6403931 MHz

===== CHANNEL f2 =====
CPDPRG2        waltz16
NUC2           1H
PCPD2          80.00 usec
PL2           0.00 dB
PL12          19.00 dB
PL13          25.00 dB
SFO2          400.2016008 MHz
SI            32768
SF            100.6303300 MHz
WDW            EM
SSB            0
LB            1.00 Hz
GB            0
PC            1.40
  
```

# 1-Aza-2-(hydroxymethyl)-3-oxo-4-oxa-6-hydroxy-8-oxo[3.3.0]octane

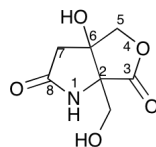

**19**

Instrument DQX400  
Chemist ykschau  
Group mgm  
SC118 (iii)  
h1acq.au D2O (C:NMR) mgmgrp 27

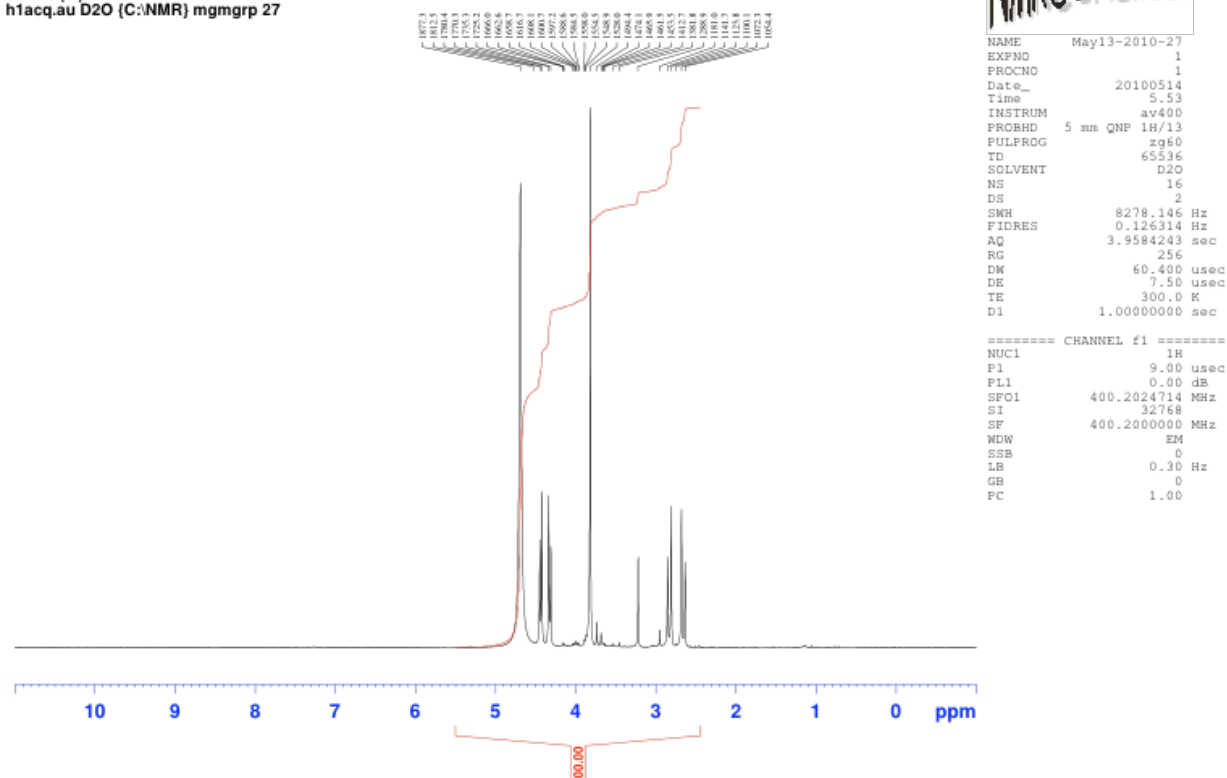

# 1-Aza-2-(hydroxymethyl)-3-oxo-4-oxa-6-hydroxy-8-oxo[3.3.0]octane

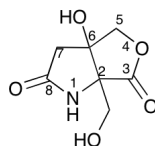

Instrument DQX400  
Chemist ykschau  
Group mgm  
SC118 (iii)  
c13acq.au D2O {C:NMR} mgmgrp 27

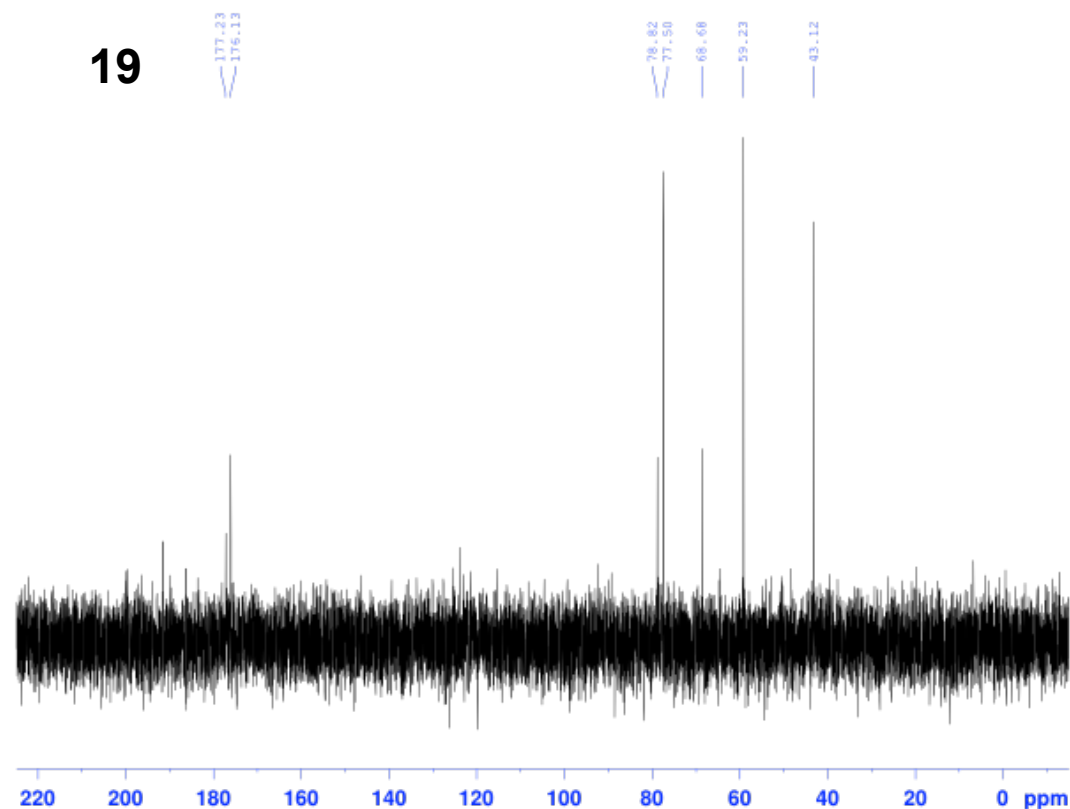

**NMR@CHEM.OX**

```

NAME      May13-2010-27
EXPNO     2
PROCNO    1
Date_     20100514
Time      6.01
INSTRUM    av400
PROBHD     5 mm QNP 1H/13
PULPROG    zgpg30
TD         32768
SOLVENT    D2O
NS         256
DS         4
SWH         26178.010 Hz
FIDRES     0.798889 Hz
AQ         0.6259188 sec
RG         32768
DM         19.100 usec
DE         7.50 usec
TE         300.0 K
D1         1.00000000 sec
D11        0.03000000 sec
TD0        1

===== CHANNEL f1 =====
NUC1       13C
P1         9.50 usec
Pl1        0.00 dB
SFO1       100.6403931 MHz

===== CHANNEL f2 =====
CPDPRG2    waltz16
NUC2       1H
PCPD2      80.00 usec
Pl2        0.00 dB
Pl12       19.00 dB
Pl13       25.00 dB
SFO2       400.2016008 MHz
SI         32768
SF         100.6303300 MHz
WDW        EM
SSB        0
LB         1.00 Hz
GB         0
PC         1.40
    
```



# (2*R*, 5*S*)-methyl-1-(4'-(benzyloxy)-2'-methyl-3'-oxobutanoyl)-2-(*tert*-butyl)-5-carboxylate oxazolidine

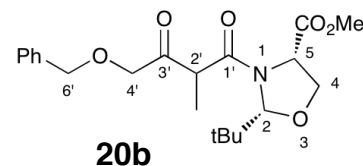

Instrument DQX400  
Chemist ykschau  
Group mgm  
SC117 f3  
h1acq.au CDCl3 {C:NMR} mgmgrp.3

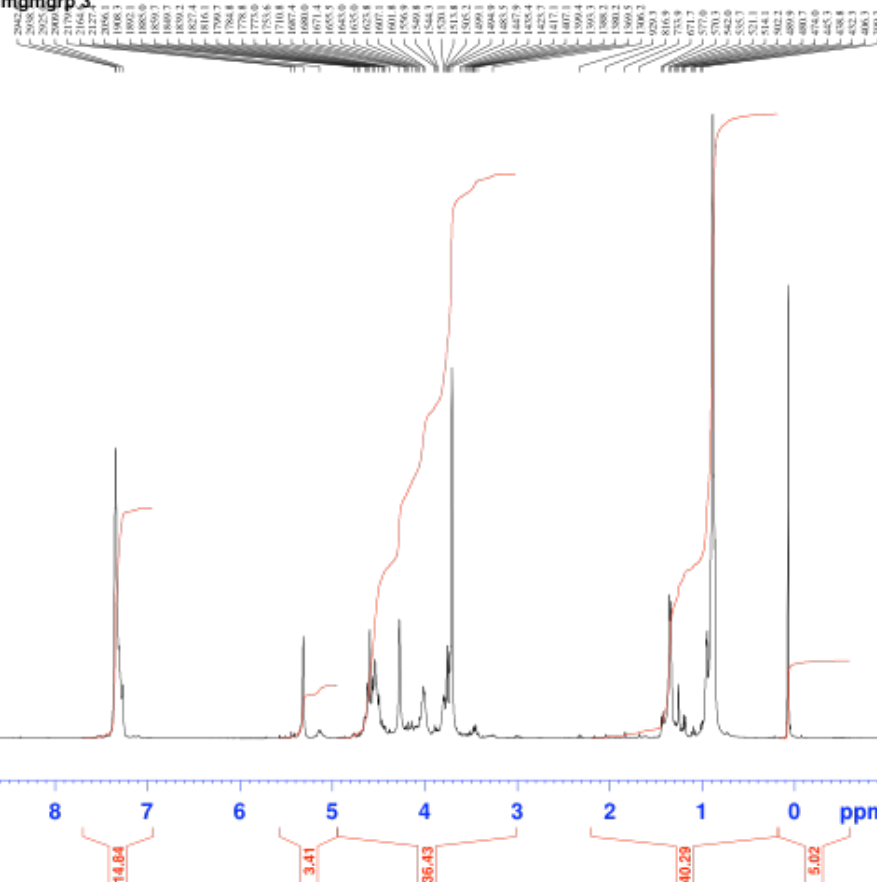

# (2R, 5S)-methyl-1-(4'-(benzyloxy)-2'-methyl-3'-oxobutanoyl)-2-(tert-butyl)-5-carboxylate oxazolidine

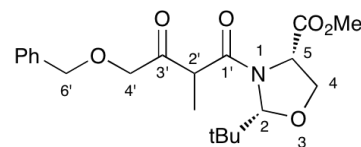

**20b**

Instrument DQX400  
Chemist ykschau  
Group mgm  
SC117 f3  
c13acq.au CDCl3 {C:NMR} mgmgrp 3

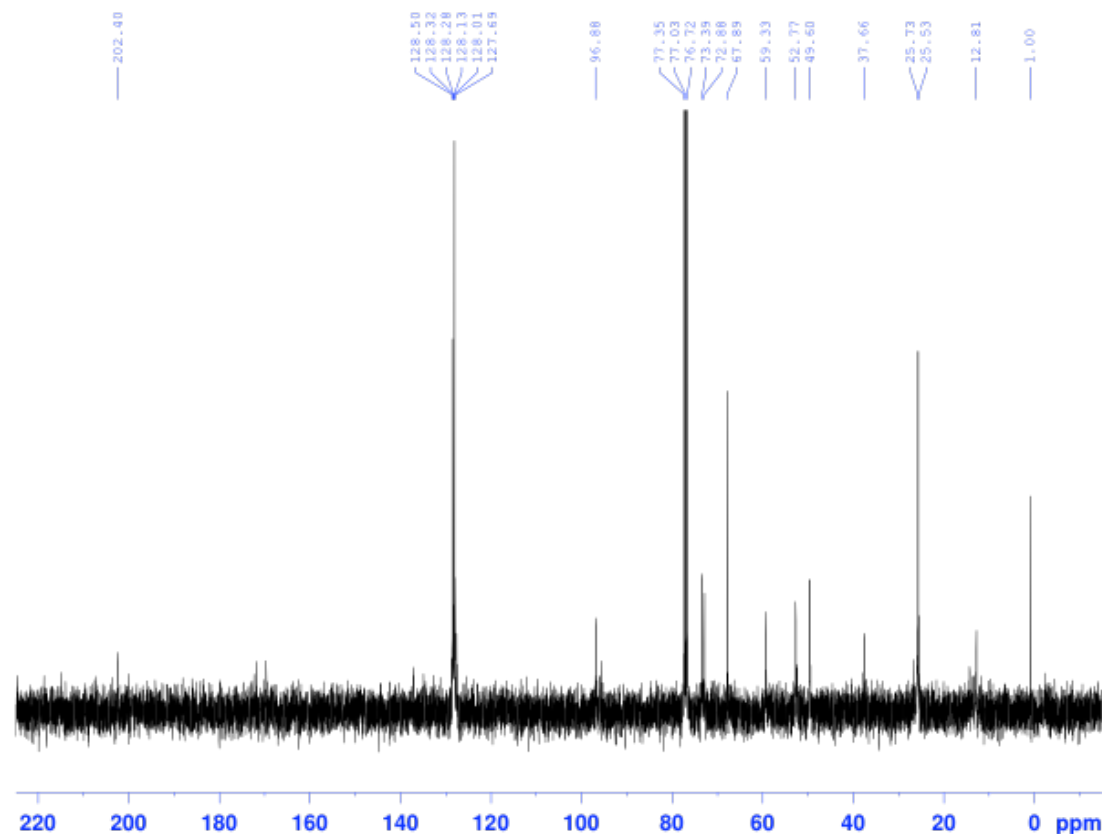

|                        |                 |
|------------------------|-----------------|
| NAME May11-2010-3      |                 |
| EXPNO                  | 2               |
| PROCNO                 | 1               |
| Date_                  | 20100512        |
| Time                   | 7.05            |
| INSTRUM                | av400           |
| PROBHD                 | 5 mm QNP 1H/13  |
| PULPROG                | zgpg30          |
| TD                     | 32768           |
| SOLVENT                | CDCl3           |
| NS                     | 256             |
| DS                     | 4               |
| SWH                    | 26178.010 Hz    |
| FIDRES                 | 0.798889 Hz     |
| AQ                     | 0.6259188 sec   |
| RG                     | 32768           |
| DW                     | 19.100 usec     |
| DE                     | 7.50 usec       |
| TE                     | 300.0 K         |
| D1                     | 1.00000000 sec  |
| D11                    | 0.03000000 sec  |
| TD0                    | 1               |
| ===== CHANNEL f1 ===== |                 |
| NUC1                   | 13C             |
| P1                     | 9.50 usec       |
| PL1                    | 0.00 dB         |
| SFO1                   | 100.6403931 MHz |
| ===== CHANNEL f2 ===== |                 |
| CPDPRG2                | waltz16         |
| NUC2                   | 1H              |
| PCPD2                  | 80.00 usec      |
| PL2                    | 0.00 dB         |
| PL12                   | 19.00 dB        |
| PL13                   | 25.00 dB        |
| SFO2                   | 400.2016008 MHz |
| SI                     | 32768           |
| SF                     | 100.6303718 MHz |
| WDM                    | EM              |
| SSB                    | 0               |
| LB                     | 1.00 Hz         |
| GB                     | 0               |
| PC                     | 1.40            |



# (2R, 5S)-methyl 1-(4'-(*tert*-butoxy)-2'-methyl-3'-oxobutanoyl)-2-(*tert*-butyl)-5-carboxylate oxazolidine

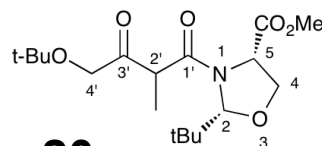

**20c**

Instrument DQX400  
Chemist ykschau  
Group mgm  
SC116f1  
c13acq.au CDCl3 {C:NMR} mgmgrp 1

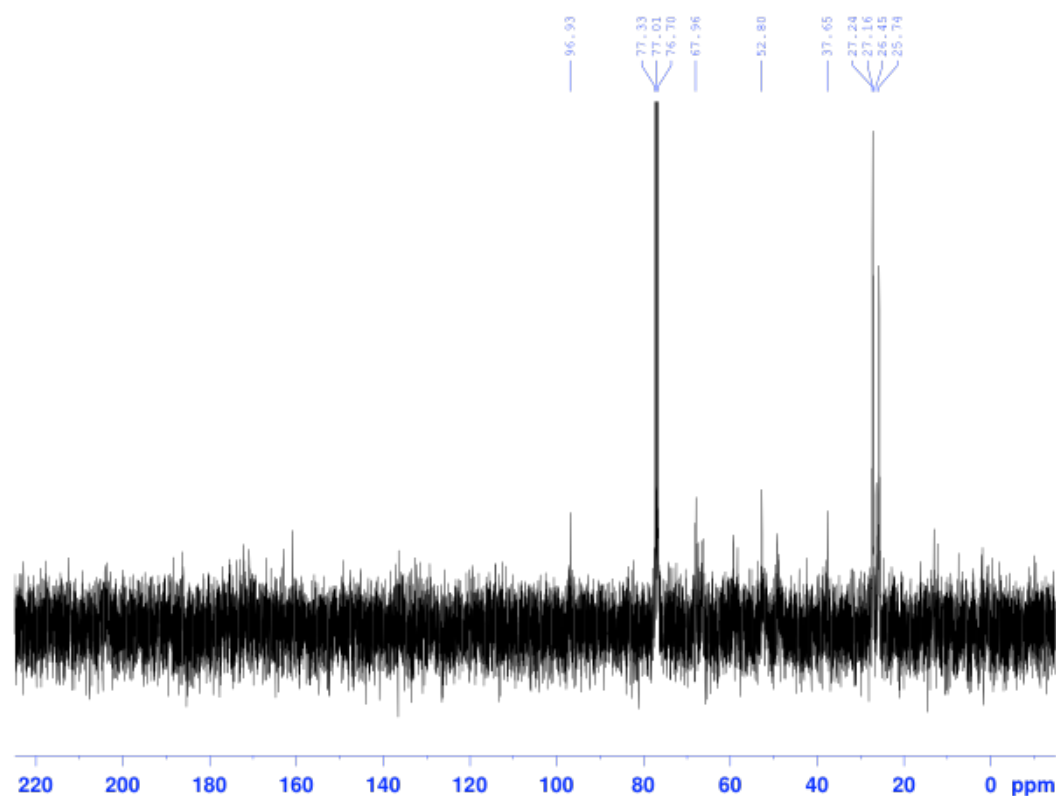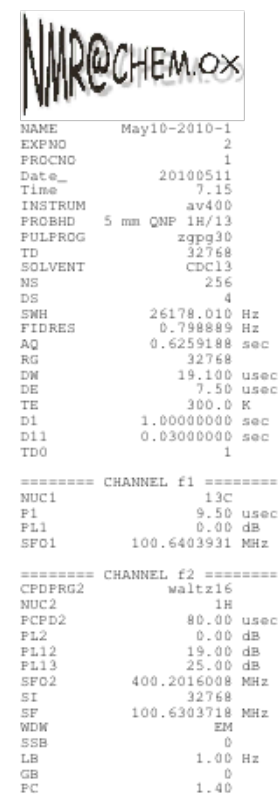

Instrument DPX200

Chemist PJF

Group MGM

PF038(1)

h1acq.au CDCl3 {C:NMR} mgmgrp 22

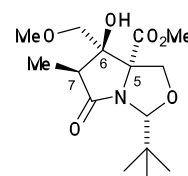

21a

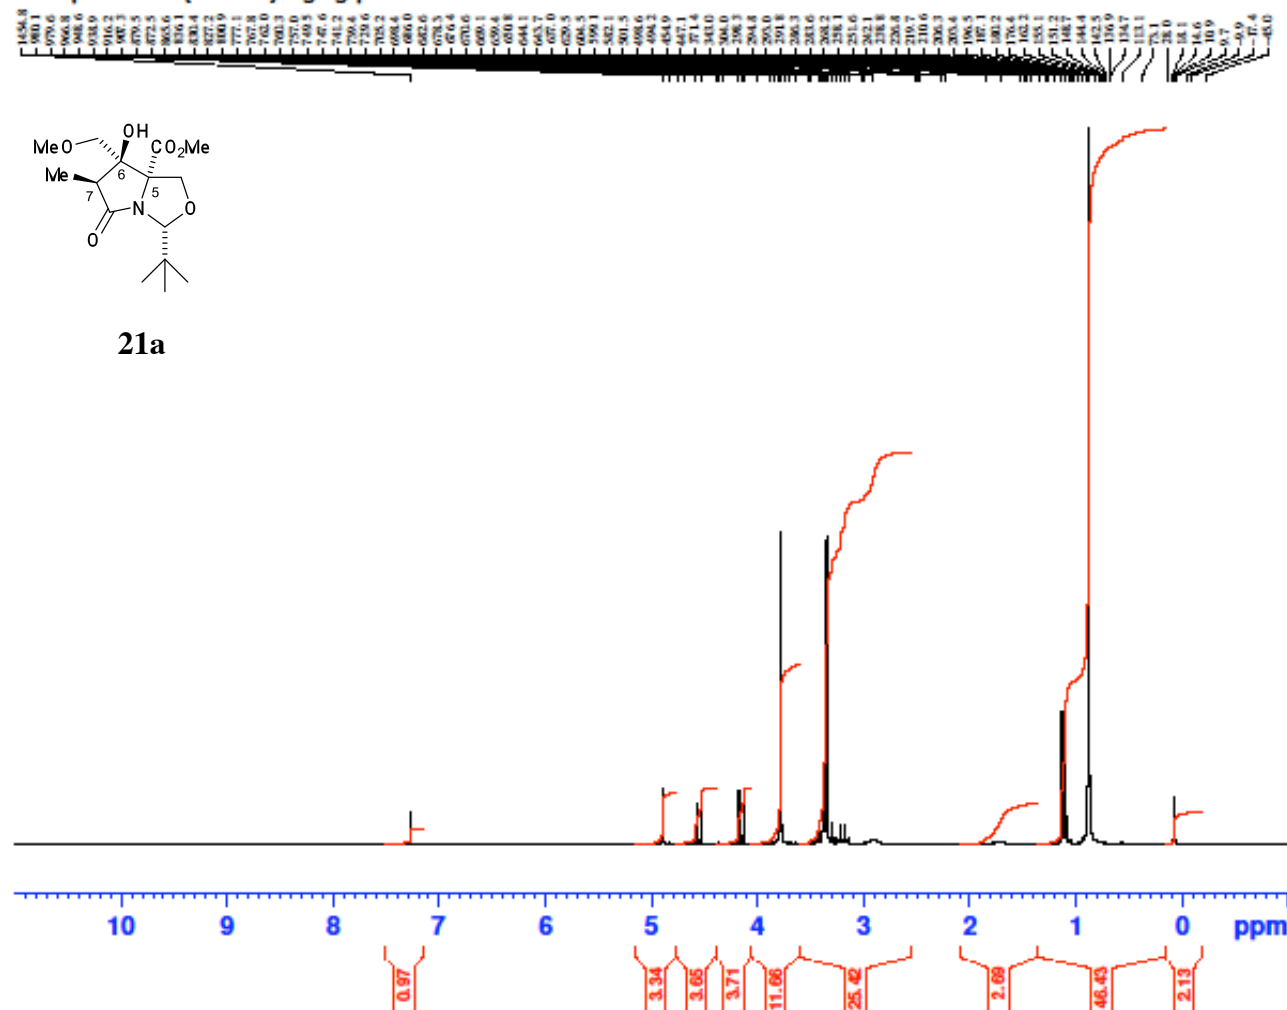

NMR@CHEM.OX

Current Data Parameters

NAME Apr28-2010-22

EXPNO 1

PROCNO 1

F2 - Acquisition Parameters

Date\_ 20100428

Time 18.32

INSTRUM dpx200

PROBHD 5 mm Dual 13C/

PULPROG zg60

TD 16384

SOLVENT CDCl3

NS 16

DS 2

SWH 2796.421 Hz

FIDRES 0.170680 Hz

AQ 2.9295092 sec

RG 574.7

DW 178.800 usec

DE 6.00 usec

TE 300.0 K

D1 1.00000000 sec

===== CHANNEL f1 =====

NUC1 1H

P1 7.80 usec

PL1 -3.00 dB

SFO1 200.1310007 MHz

F2 - Processing parameters

SI 32768

SF 200.1300125 MHz

WDW EM

SSB 0

LB 0.30 Hz

GB 0

PC 1.00

Instrument DQX400  
Chemist PJF  
Group MGM  
PF038  
c13acq.au CDCl3 {C:NMR} mgmgrp 6

NMR@CHEM.OX

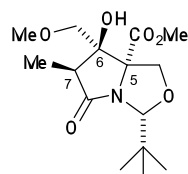

21a

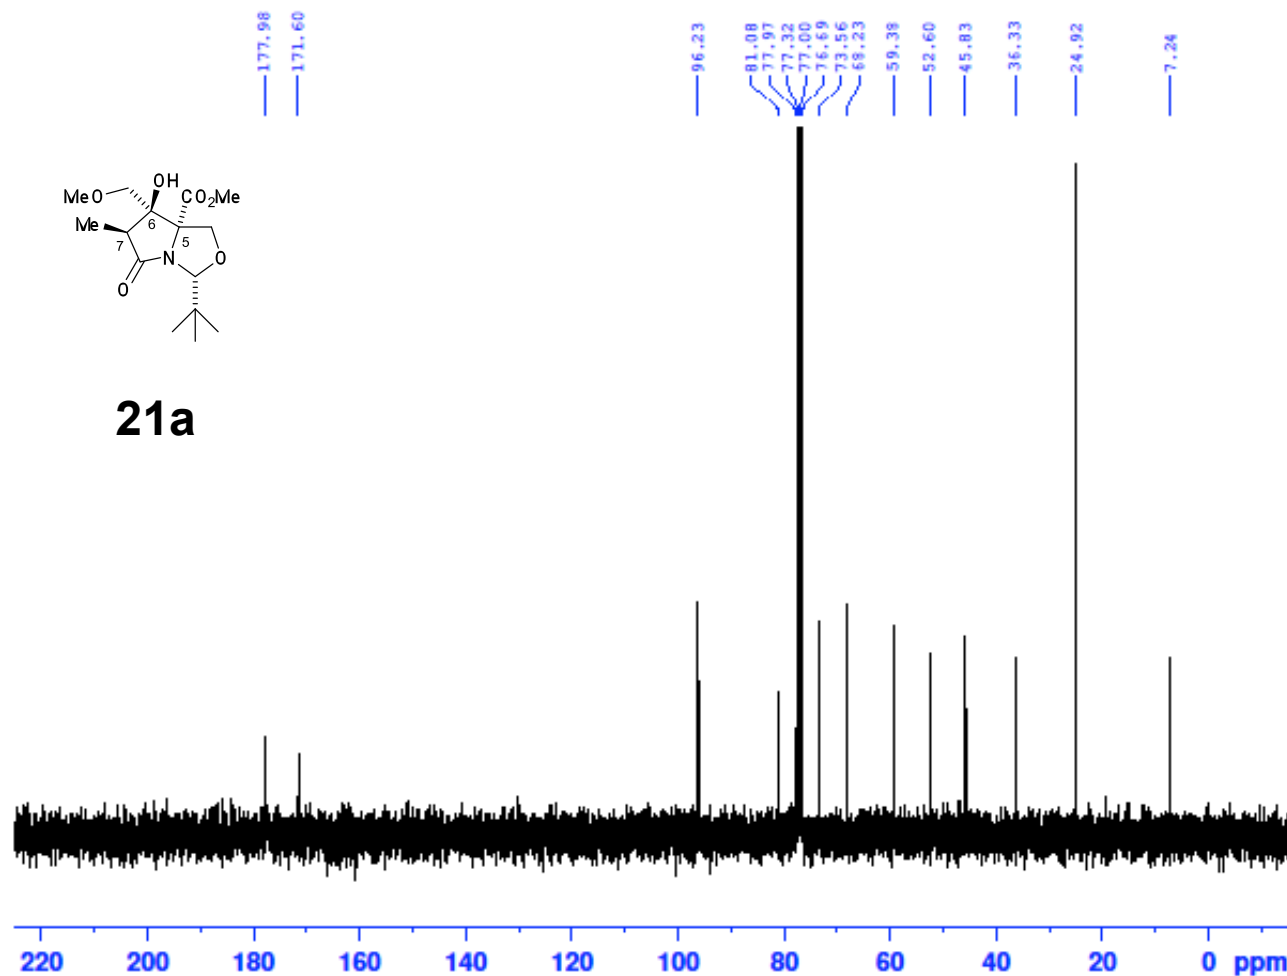

NAME Apr30-2010-6  
EXPNO 2  
PROCNO 1  
Date\_ 20100430  
Time 21.52  
INSTRUM av400  
PROBHD 5 mm QNP 1H/13  
PULPROG zgpg30  
TD 32768  
SOLVENT CDCl3  
NS 256  
DS 4  
SWH 26178.010 Hz  
FIDRES 0.798889 Hz  
AQ 0.6259188 sec  
RG 32768  
DW 19.100 usec  
DE 7.50 usec  
TE 300.0 K  
D1 1.00000000 sec  
D11 0.03000000 sec  
TD0 1

===== CHANNEL f1 =====  
NUC1 13C  
P1 9.50 usec  
PL1 0.00 dB  
SFO1 100.6403931 MHz

===== CHANNEL f2 =====  
CPDPRG2 waltz16  
NUC2 1H  
PCPD2 80.00 usec  
PL2 0.00 dB  
PL12 19.00 dB  
PL13 25.00 dB  
SFO2 400.2016008 MHz  
SI 32768  
SF 100.6303718 MHz  
WDW EM  
SSB 0  
LB 1.00 Hz  
GB 0  
PC 1.40

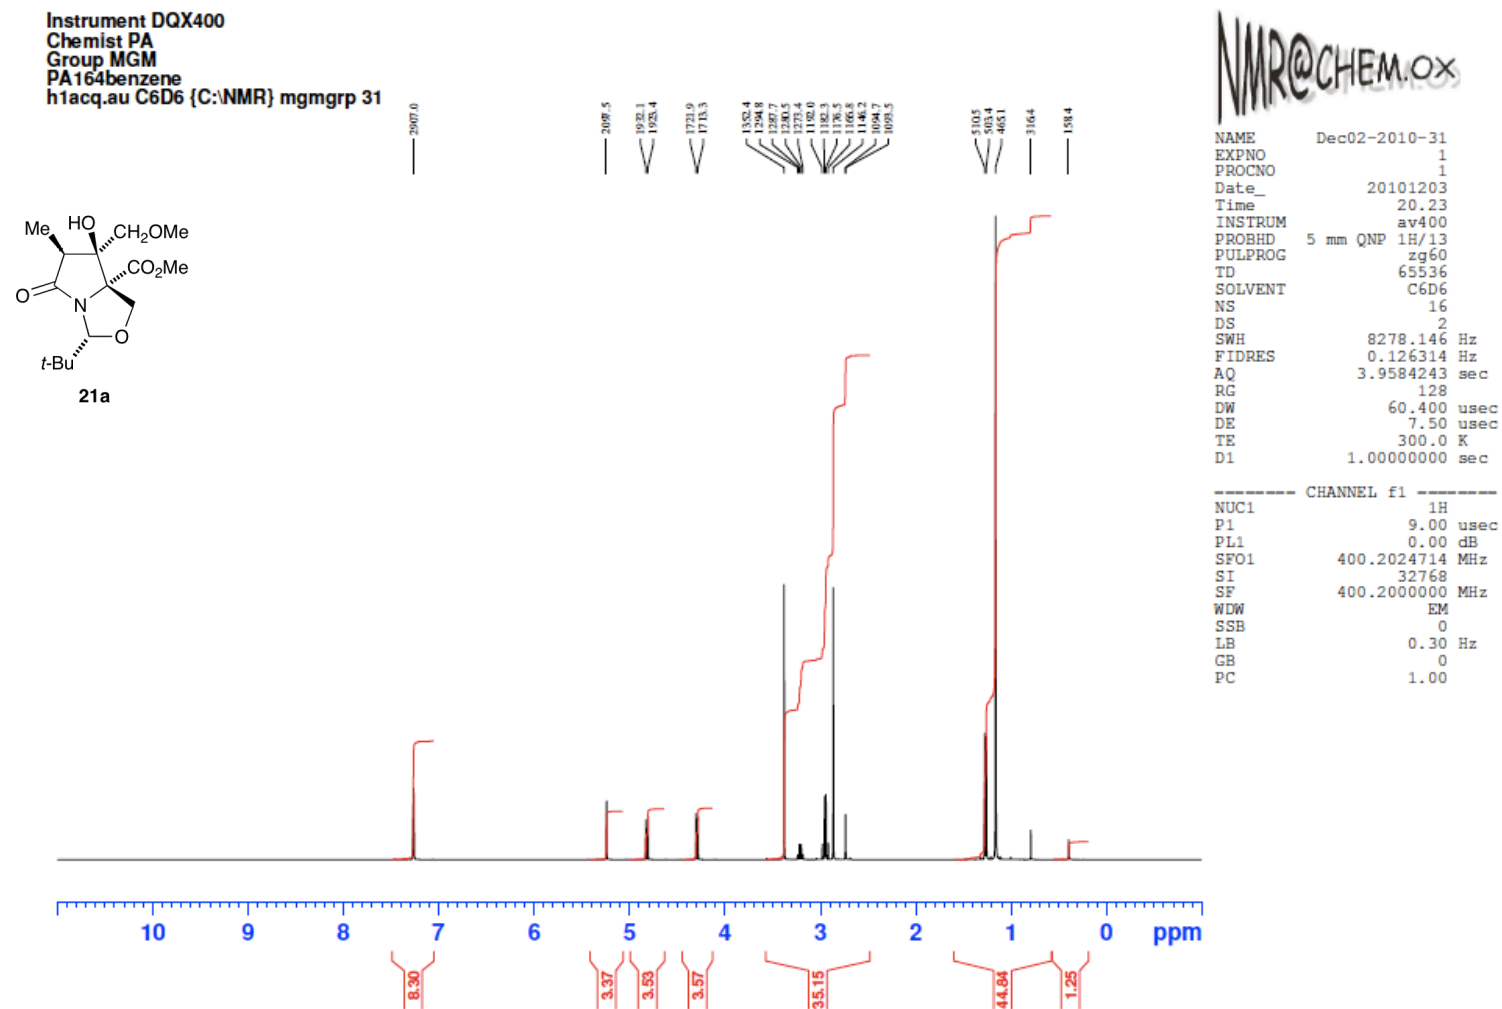

Instrument DQX400

Chemist PA

Group MGM

PA164benzene

c13acq.au C6D6 {C:NMR} mgmgrp 31

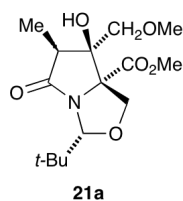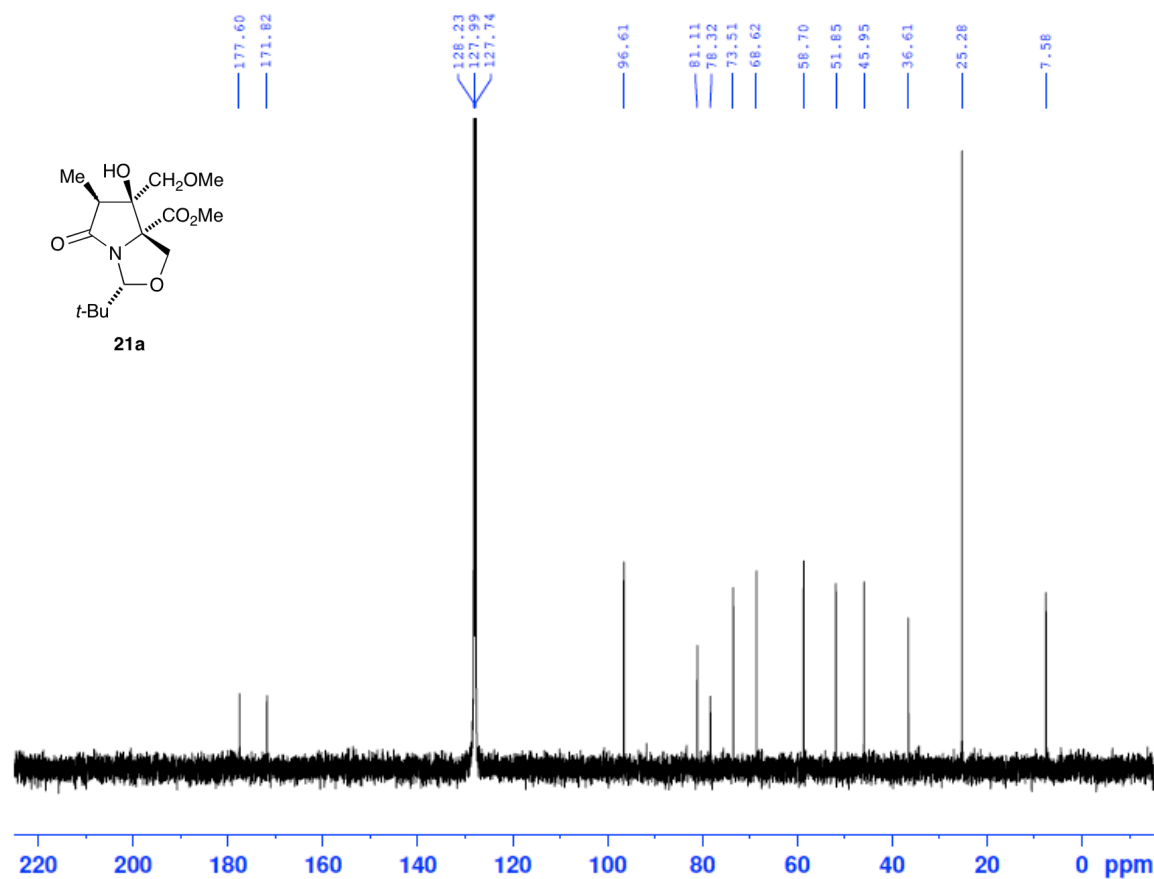

NMR@CHEM.OX

NAME Dec02-2010-31  
EXPNO 4  
PROCNO 1  
Date\_ 20101203  
Time 20.41  
INSTRUM av400  
PROBHD 5 mm QNP 1H/13  
PULPROG zgpg30  
TD 32768  
SOLVENT C6D6  
NS 256  
DS 4  
SWH 26178.010 Hz  
FIDRES 0.798889 Hz  
AQ 0.6259188 sec  
RG 32768  
DW 19.100 usec  
DE 7.50 usec  
TE 300.0 K  
D1 1.00000000 sec  
D11 0.03000000 sec  
TD0 1

----- CHANNEL f1 -----  
NUC1 13C  
P1 9.50 usec  
PL1 0.00 dB  
SFO1 100.6403931 MHz

----- CHANNEL f2 -----  
CPDPRG2 waltz16  
NUC2 1H  
PCPD2 80.00 usec  
PL2 0.00 dB  
PL12 19.00 dB  
PL13 25.00 dB  
SFO2 400.2016008 MHz  
SI 32768  
SF 100.6303515 MHz  
WDW EM  
SSB 0  
LB 1.00 Hz  
GB 0  
PC 1.40



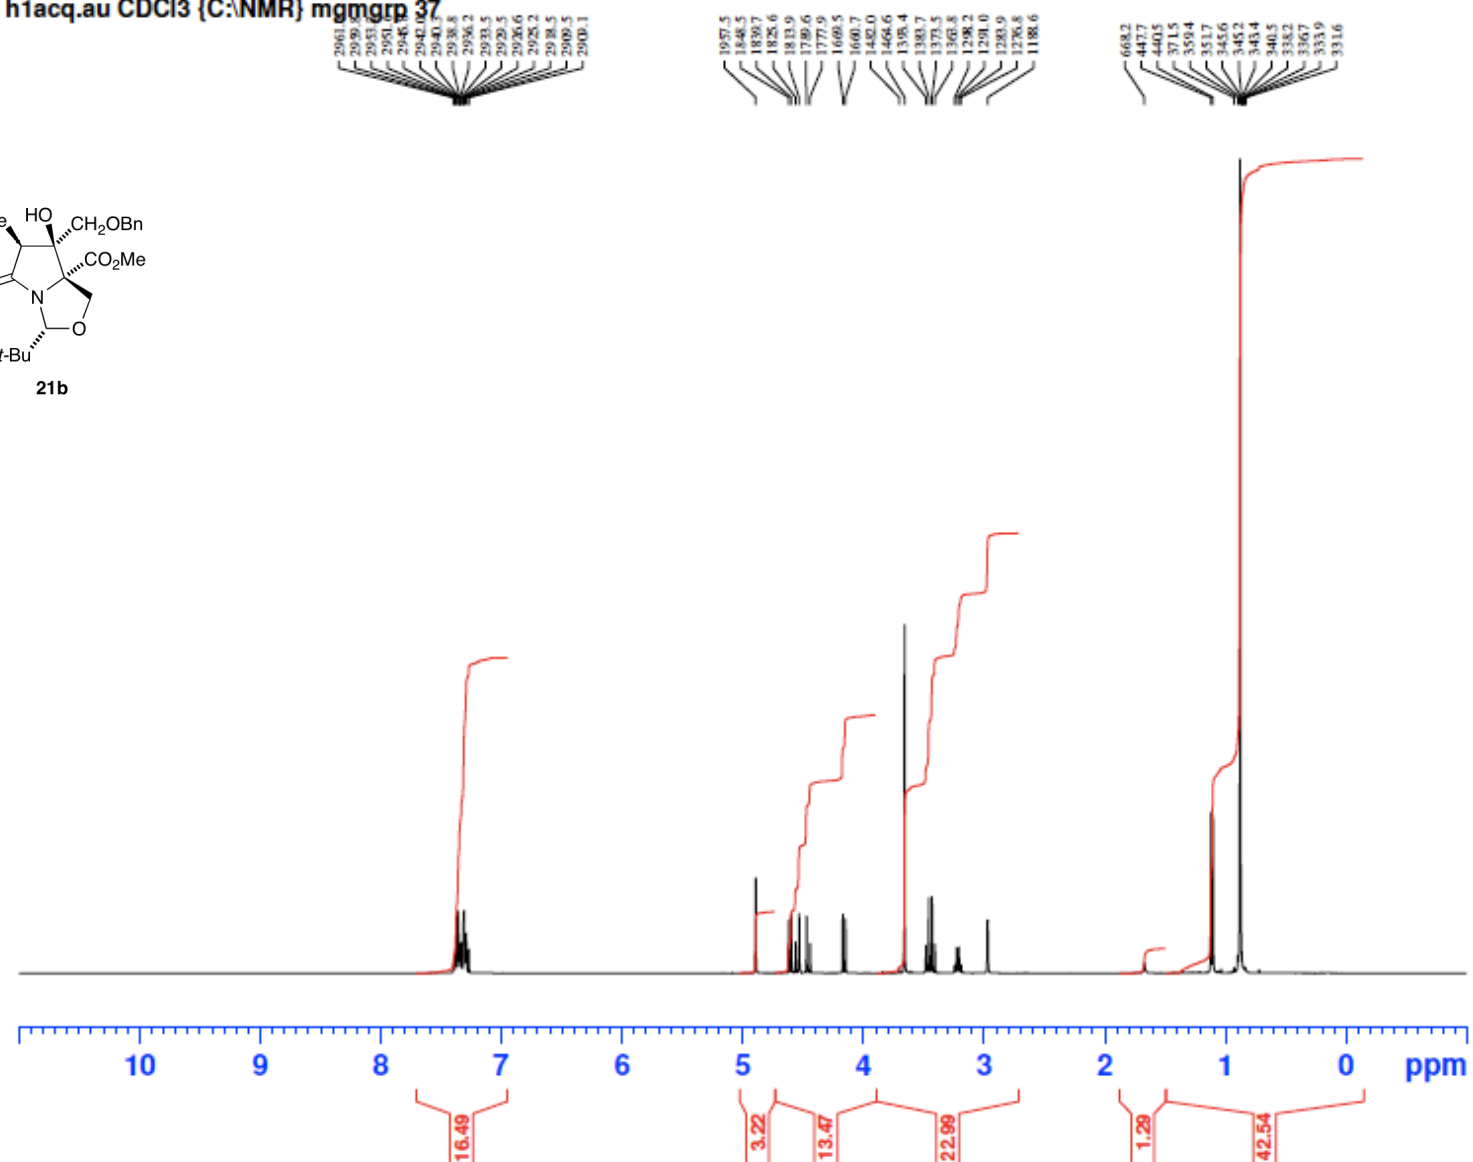

Instrument DQX400  
Chemist PA  
Group MGM  
PA183  
c13acq.au CDCl<sub>3</sub> {C:\NMR} mgmgrp 37

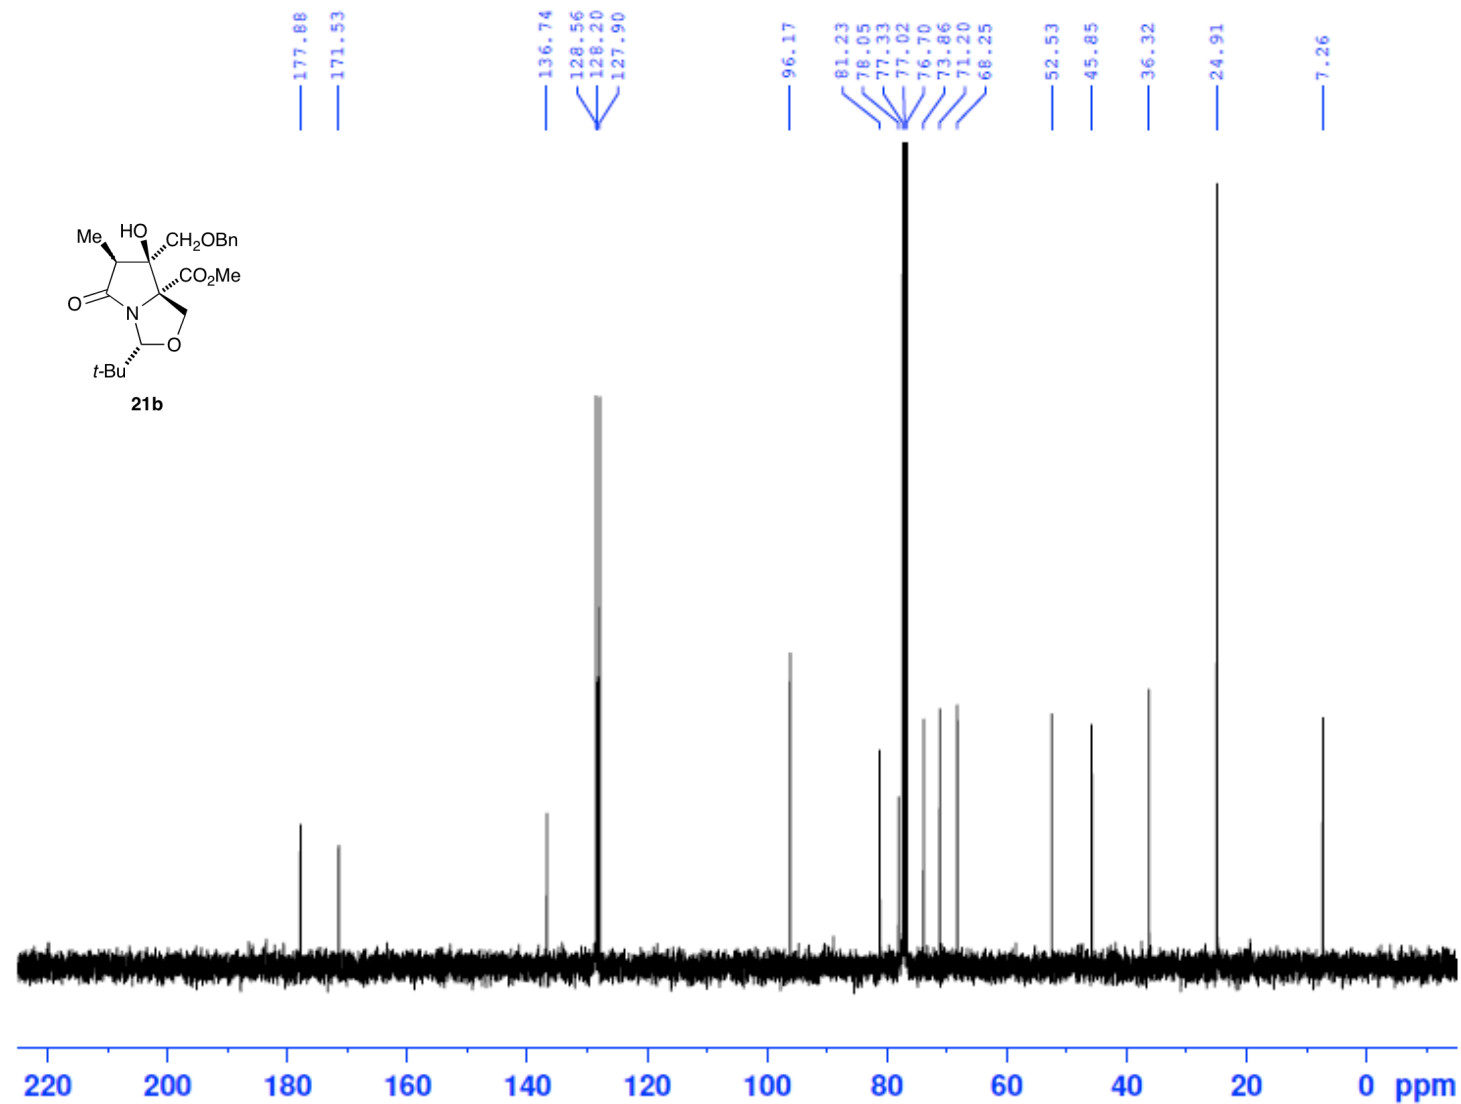

# (2R, 5R, 6R, 7S)-1-Aza-2-(*tert*-butyl)-6-hydroxy-7-methyl-6-(benzyloxymethyl)-5-methoxycarbonyl-3-oxabicyclo[3.3.0]octane

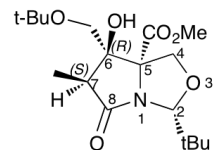

**21c**

Instrument DPX200  
Chemist ykschau  
Group mgm  
SC119 f2  
h1acq.au CDCl3 {C:NMR} mgmgrp 18

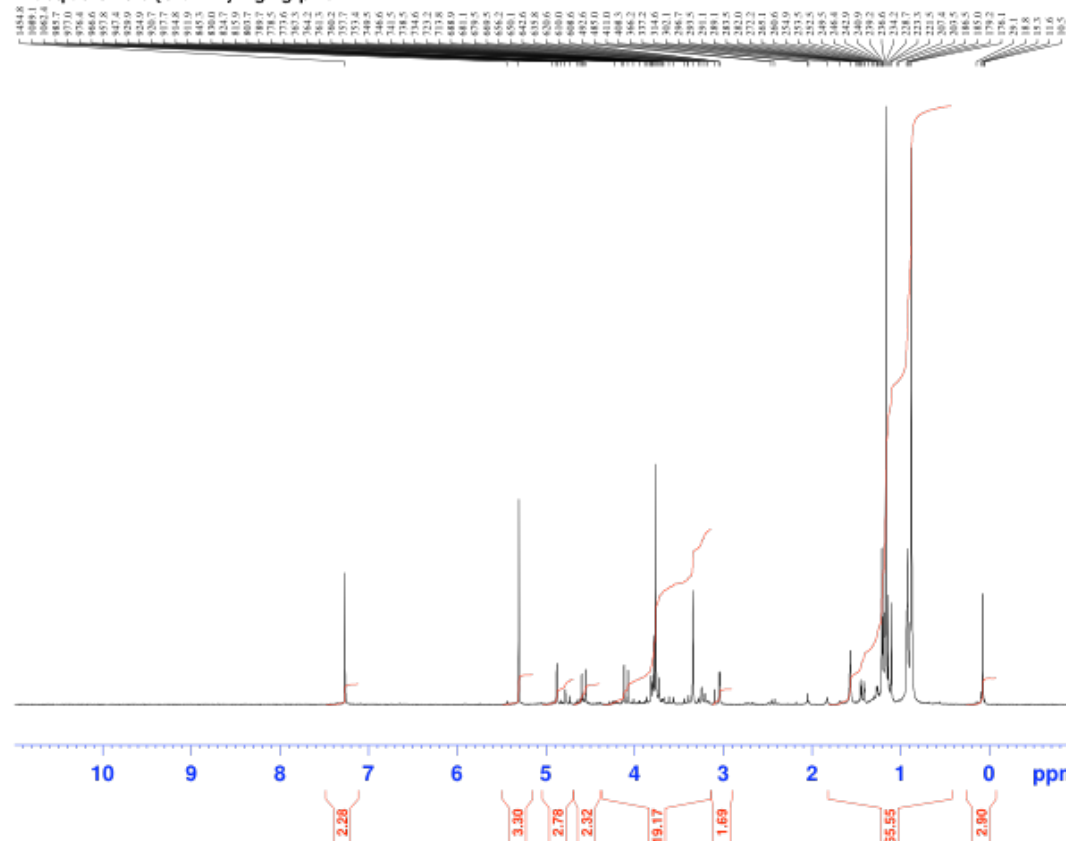

NMR@CHEM.OX

Current Data Parameters  
NAME May12-2010-18  
EXPNO 1  
PROCNO 1

F2 - Acquisition Parameters  
Date\_ 20100512  
Time 22.40  
INSTRUM dpx200  
PROBHD 5 mm Dual 13C/  
PULPROG zgpg30  
TD 16384  
SOLVENT CDCl3  
NS 16  
DS 2  
SWH 2796.421 Hz  
FIDRES 0.170680 Hz  
AQ 2.9295092 sec  
RG 1024  
DM 178.800 usec  
DE 6.00 usec  
TE 300.0 K  
D1 1.00000000 sec

===== CHANNEL f1 =====  
NUC1 1H  
P1 7.80 usec  
PL1 -3.00 dB  
SFO1 200.1310007 MHz

F2 - Processing parameters  
SI 32768  
SF 200.1300125 MHz  
WDW EM  
SSB 0  
LB 0.30 Hz  
GB 0  
PC 1.00

# (2R, 5R, 6R, 7S)-1-Aza-2-(*tert*-butyl)-6-hydroxy-7-methyl-6-(benzyloxymethyl)-5-methoxycarbonyl-3-oxabicyclo[3.3.0]octane



**21c**

Instrument AVC500  
Group MGM  
8899 Sonia Chau 13/5/10

NMR@CHEM.OX

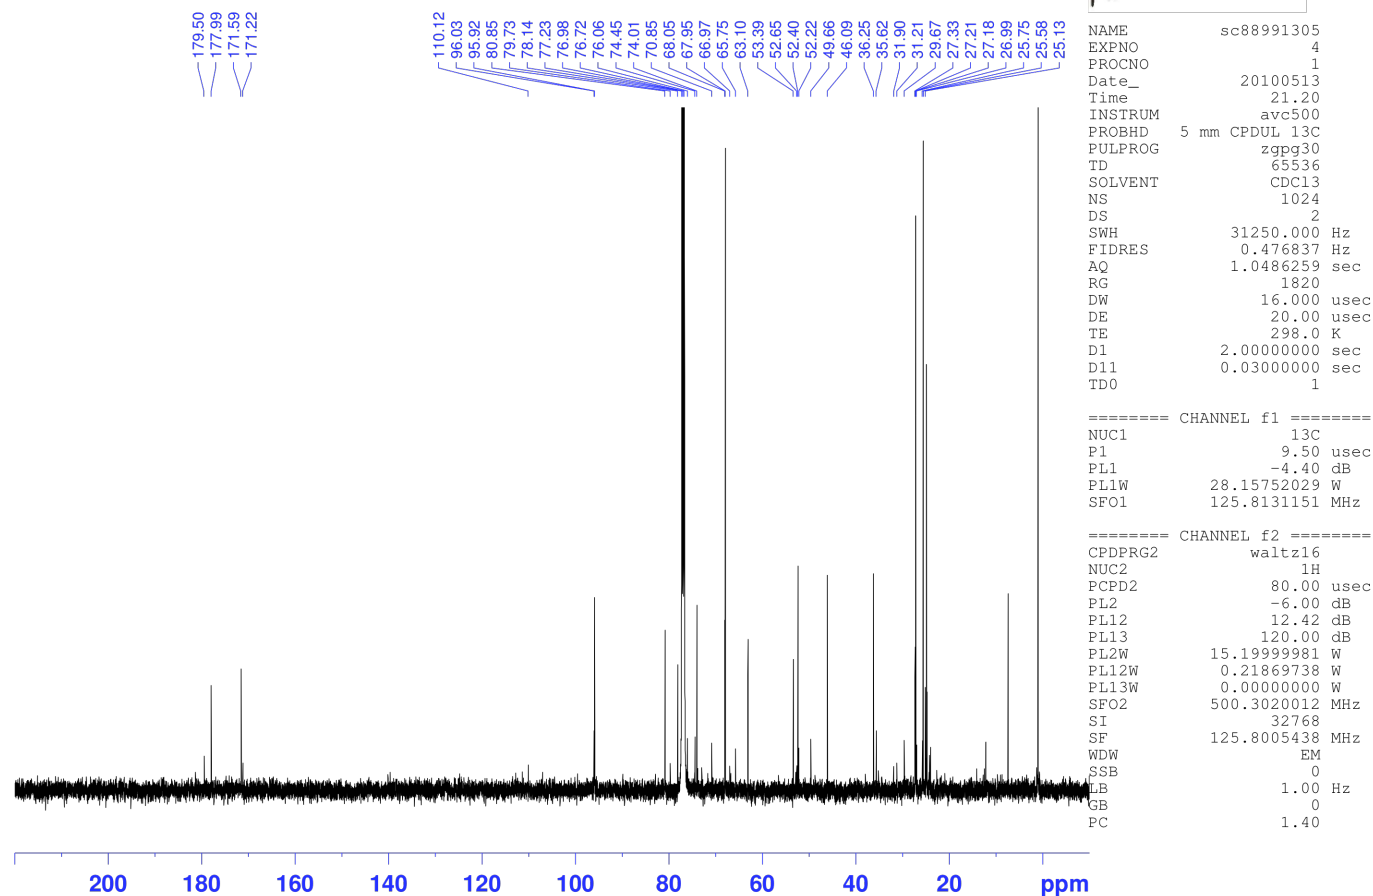

Instrument QX400  
Chemist PJF  
Group MGM  
PF038-F3  
h1acq.au CDCl3 (C:NMR) mgmgrp 46

NMR@CHEM.OX

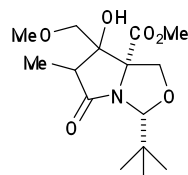

22a

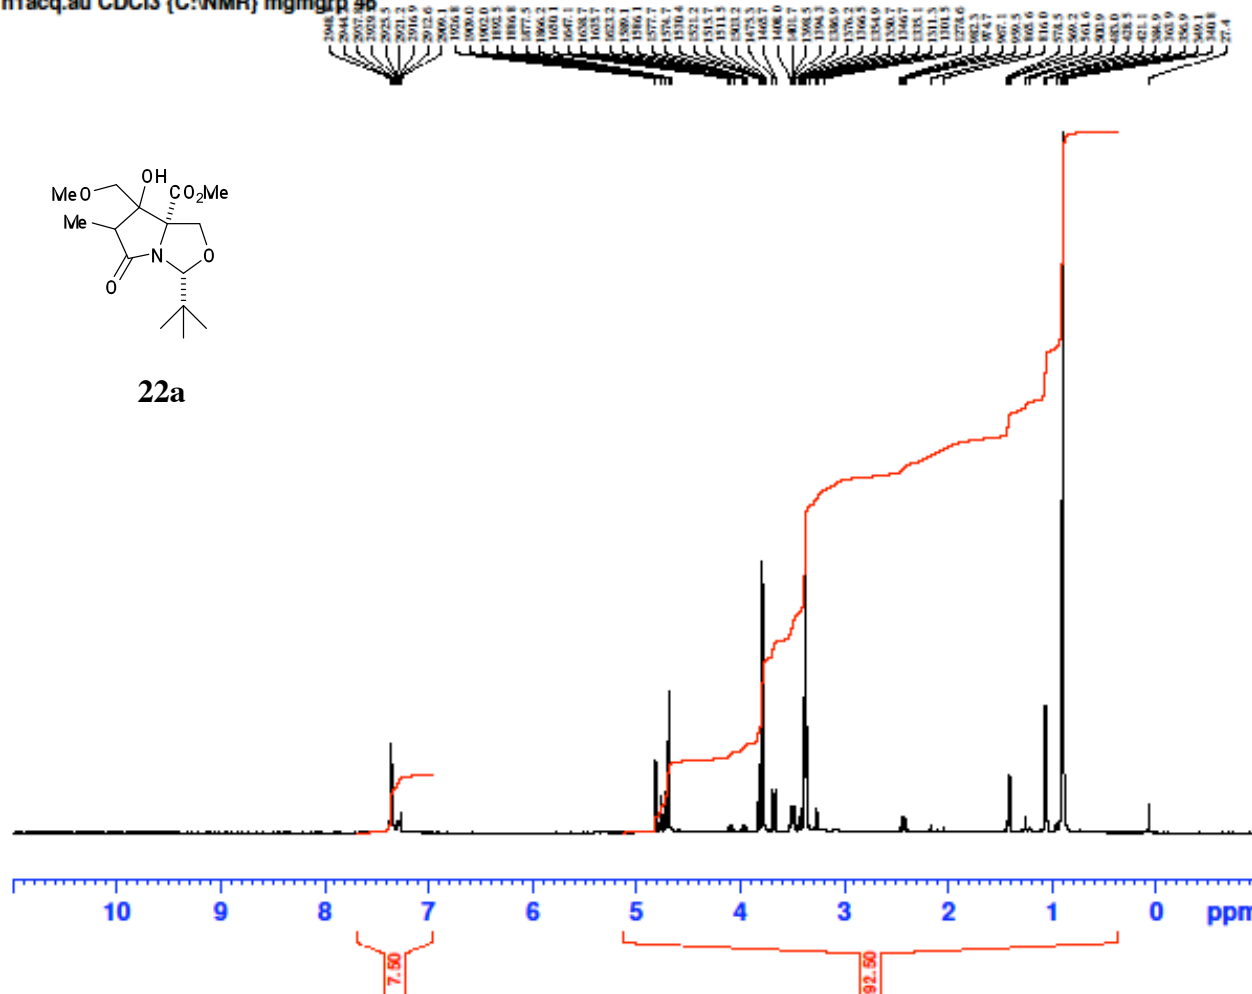

NAME May18-2010-46  
EXPNO 1  
PROCNO 1  
Date\_ 20100519  
Time 13.06  
INSTRUM av400  
PROBHD 5 mm QNP 1H/13  
PULPROG zgpg30  
TD 65536  
SOLVENT CDCl3  
NS 16  
DS 2  
SWH 8278.146 Hz  
FIDRES 0.126314 Hz  
AQ 3.9584243 sec  
RG 90.5  
DW 60.400 usec  
DE 7.50 usec  
TE 300.0 K  
D1 1.00000000 sec

===== CHANNEL f1 =====  
NUC1 1H  
P1 9.00 usec  
PL1 0.00 dB  
SFO1 400.2024714 MHz  
SI 32768  
SF 400.2000028 MHz  
WDW EM  
SSB 0  
LB 0.30 Hz  
GB 0  
PC 1.00

Instrument DQX400  
Chemist PJF  
Group MGM  
PF038-F3  
c13acq.au CDC13 {C:NMR} mgmgrp 46

NMR@CHEM.OX

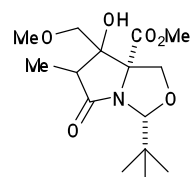

**22a**

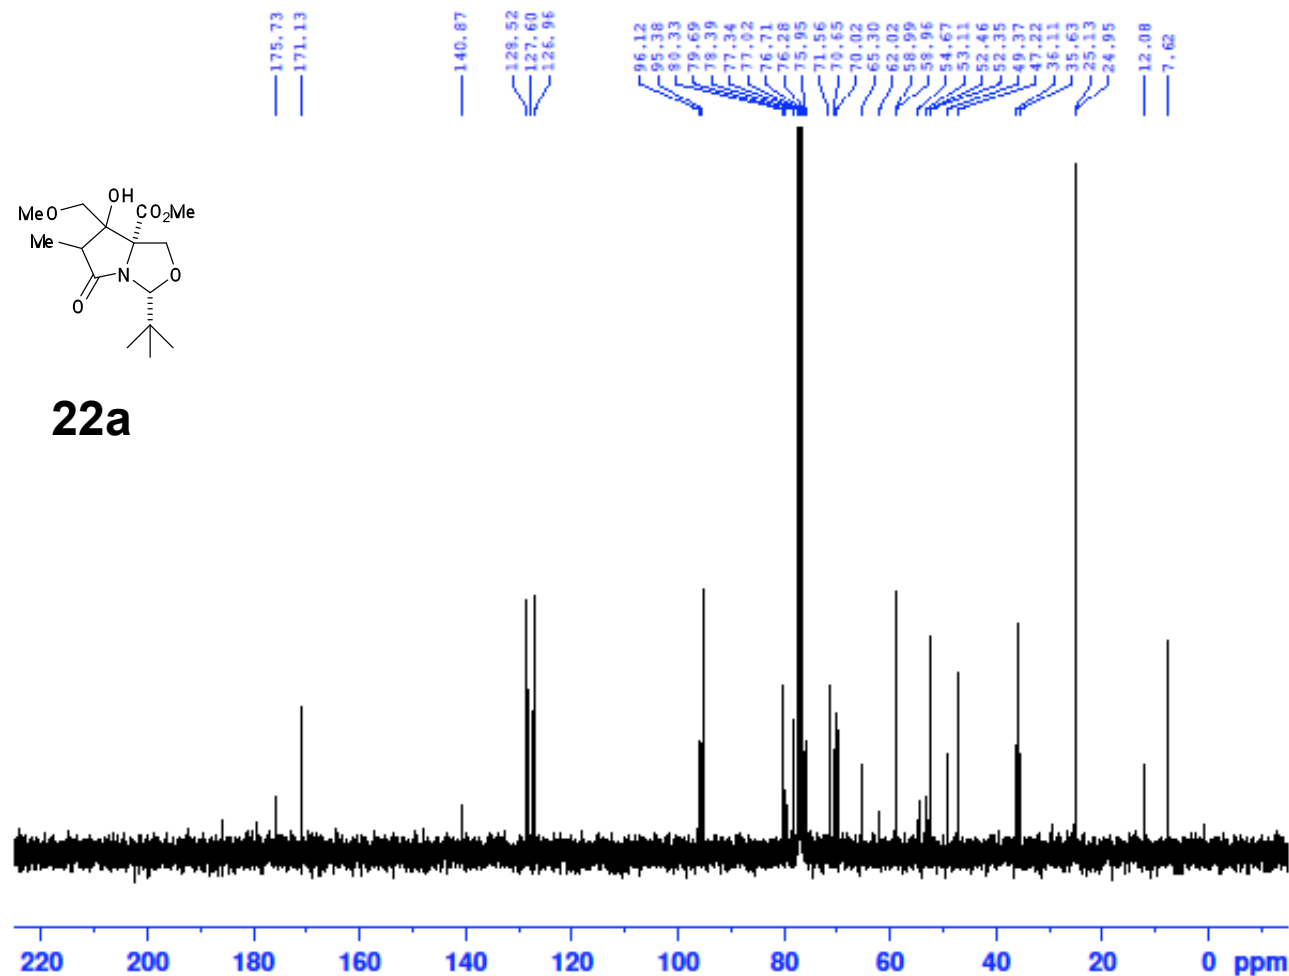

NAME May18-2010-46  
EXPNO 2  
PROCNO 1  
Date\_ 20100519  
Time 13.14  
INSTRUM av400  
PROBHD 5 mm QNP 1H/13  
PULPROG zgpg30  
TD 32768  
SOLVENT CDC13  
NS 256  
DS 4  
SWH 26178.010 Hz  
FIDRES 0.798889 Hz  
AQ 0.6259188 sec  
RG 32768  
DW 19.100 usec  
DE 7.50 usec  
TE 300.0 K  
D1 1.00000000 sec  
D11 0.03000000 sec  
TD0 1

===== CHANNEL f1 =====  
NUC1 13C  
P1 9.50 usec  
PL1 0.00 dB  
SFO1 100.6403931 MHz

===== CHANNEL f2 =====  
CPDPRG2 waltz16  
NUC2 1H  
PCPD2 80.00 usec  
PL2 0.00 dB  
PL12 19.00 dB  
PL13 25.00 dB  
SFO2 400.2016008 MHz  
SI 32768  
SF 100.6303718 MHz  
WDW EM  
SSB 0  
LB 1.00 Hz  
GB 0  
PC 1.40

# (2R, 5R, 6S, 7R)-1-Aza-2-(*tert*-butyl)-6-hydroxy-7-methyl-6-(benzyloxymethyl)-5-methoxycarbonyl-3-oxabicyclo[3.3.0]octane

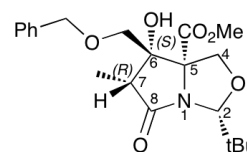

**22b**

Instrument AVC500  
Group MGM  
8984 Sonia Chau 18/5/10

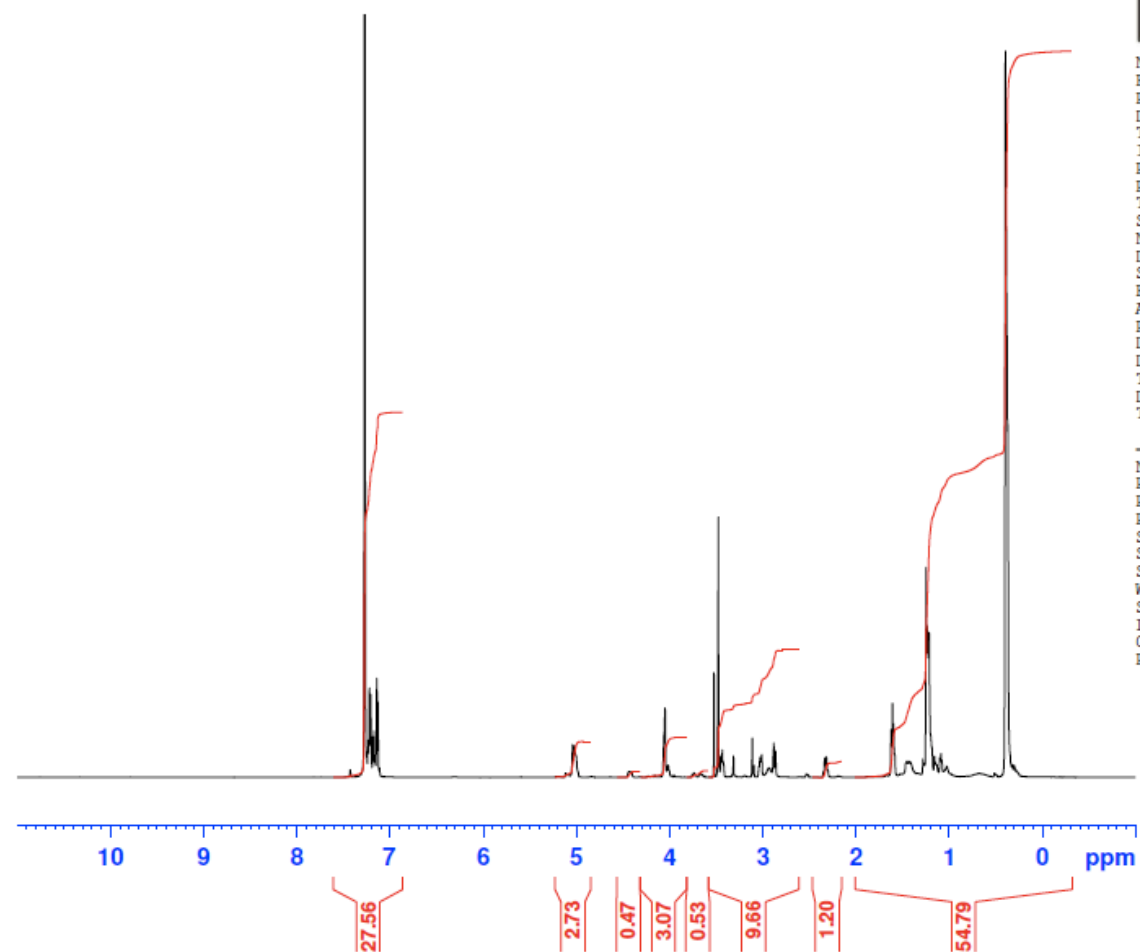

NMR@CHEM.OX

NAME sc89841805  
EXPNO 1  
PROCNO 1  
Date\_ 20100518  
Time 21.32  
INSTRUM avc500  
PROBHD 5 mm CPDUL 13C  
PULPROG zg30  
TD 65536  
SOLVENT C6D6  
NS 16  
DS 2  
SWH 10330.578 Hz  
FIDRES 0.157632 Hz  
AQ 3.1719923 sec  
RG 4  
DW 48.400 usec  
DE 6.00 usec  
TE 298.0 K  
D1 1.00000000 sec  
TD0 1

----- CHANNEL f1 -----  
NUC1 1H  
P1 9.60 usec  
PL1 -6.00 dB  
PL1W 15.19999981 W  
SF01 500.3030896 MHz  
SI 32768  
SF 500.3000000 MHz  
WDW EM  
SSB 0  
LB 0.30 Hz  
GB 0  
PC 1.00

# (2R, 5R, 6S, 7R)-1-Aza-2-(*tert*-butyl)-6-hydroxy-7-methyl-6-(benzyloxymethyl)-5-methoxycarbonyl-3-oxabicyclo[3.3.0]octane

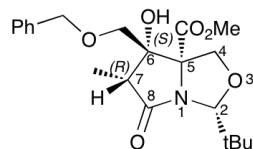

**22b**

Instrument AVC500  
Group MGM  
8984 Sonia Chau 18/5/10

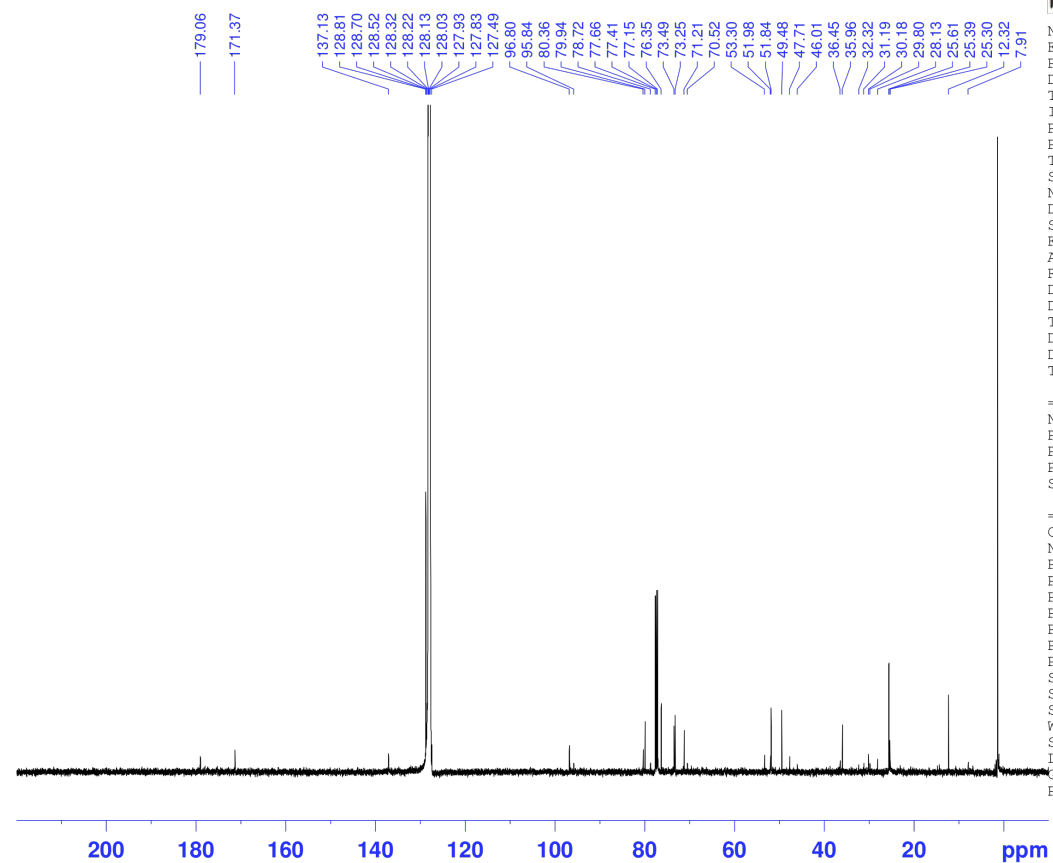

NMR@CHEM.OX

```

NAME          sc89841805
EXPNO         4
PROCNO        1
Date_         20100518
Time          22.42
INSTRUM       avc500
PROBHD        5 mm CPDUL 13C
PULPROG       zgpg30
TD            65536
SOLVENT       CDCl3
NS            1024
DS            2
SWH           31250.000 Hz
FIDRES        0.476837 Hz
AQ            1.0486259 sec
RG            912
DW            16.000 usec
DE            20.00 usec
TE            298.0 K
D1            2.00000000 sec
D11           0.03000000 sec
TD0           1

===== CHANNEL f1 =====
NUC1           13C
P1             9.50 usec
PL1            -4.40 dB
PL1W          28.15752029 W
SFO1           125.8131151 MHz

===== CHANNEL f2 =====
CPDPRG2       waltz16
NUC2           1H
PCPD2         80.00 usec
PL2            -6.00 dB
PL12          12.42 dB
PL13          120.00 dB
PL2W          15.19999981 W
PL12W         0.21869738 W
PL13W         0.00000000 W
SFO2           500.3020012 MHz
SI             32768
SF            125.8005073 MHz
WDW            EM
SSB            0
LB             1.00 Hz
GB            0
PC             1.40
    
```



# **(2*R*, 5*R*, 6*S*, 7*R*)-1-Aza-2-(*tert*-butyl)-6-hydroxy-7-methyl-6-(benzyloxymethyl)-5-methoxycarbonyl-3-oxabicyclo[3.3.0]octane**

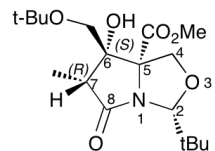

**22c**

Instrument AVC500  
Group MGM  
SONIA CHAN 8991 20/5/10

NMR@CHEM.OX

NAME sc89912005  
EXPNO 1  
PROCNO 1  
Date\_ 20100520  
Time 23.28  
INSTRUM avc500  
PROBHD 5 mm CPDUL 13C  
PULPROG zg30  
TD 65536  
SOLVENT C6D6  
NS 16  
DS 2  
SWH 10330.578 Hz  
FIDRES 0.157632 Hz  
AQ 3.1719923 sec  
RG 4  
DW 48.400 usec  
DE 6.00 usec  
TE 298.0 K  
D1 1.00000000 sec  
TD0 1

----- CHANNEL f1 -----  
NUC1 1H  
P1 9.60 usec  
PL1 -6.00 dB  
PL1W 15.19999981 W  
SFO1 500.3030896 MHz  
SI 32768  
SF 500.3000000 MHz  
WDW EM  
SSB 0  
LB 0.30 Hz  
GB 0  
PC 1.00

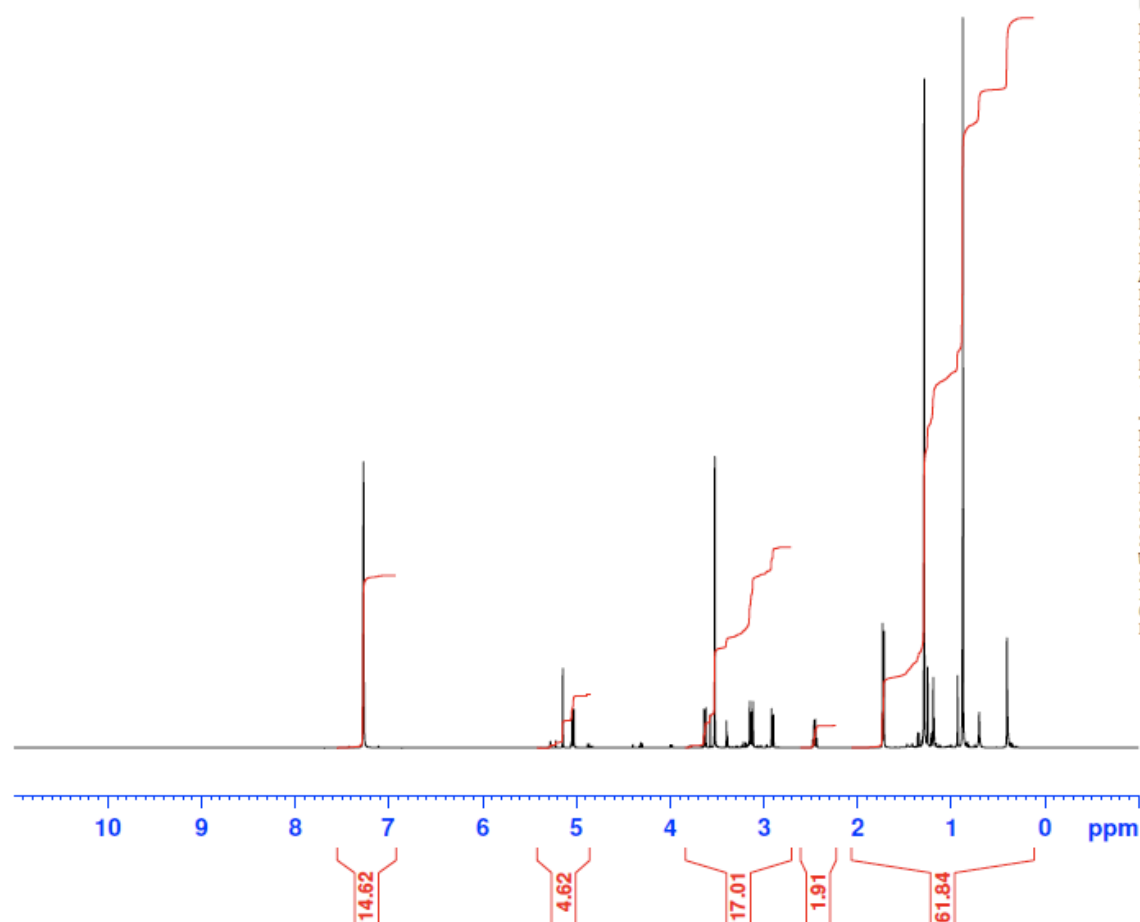

# (2R, 5R, 6S, 7R)-1-Aza-2-(*tert*-butyl)-6-hydroxy-7-methyl-6-(benzyloxymethyl)-5-methoxycarbonyl-3-oxabicyclo[3.3.0]octane

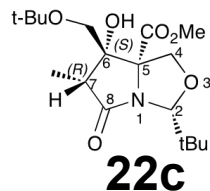

Instrument AVC500  
Group MGM  
SONIA CHAN 8991 20/5/10

NMR@CHEM.OX

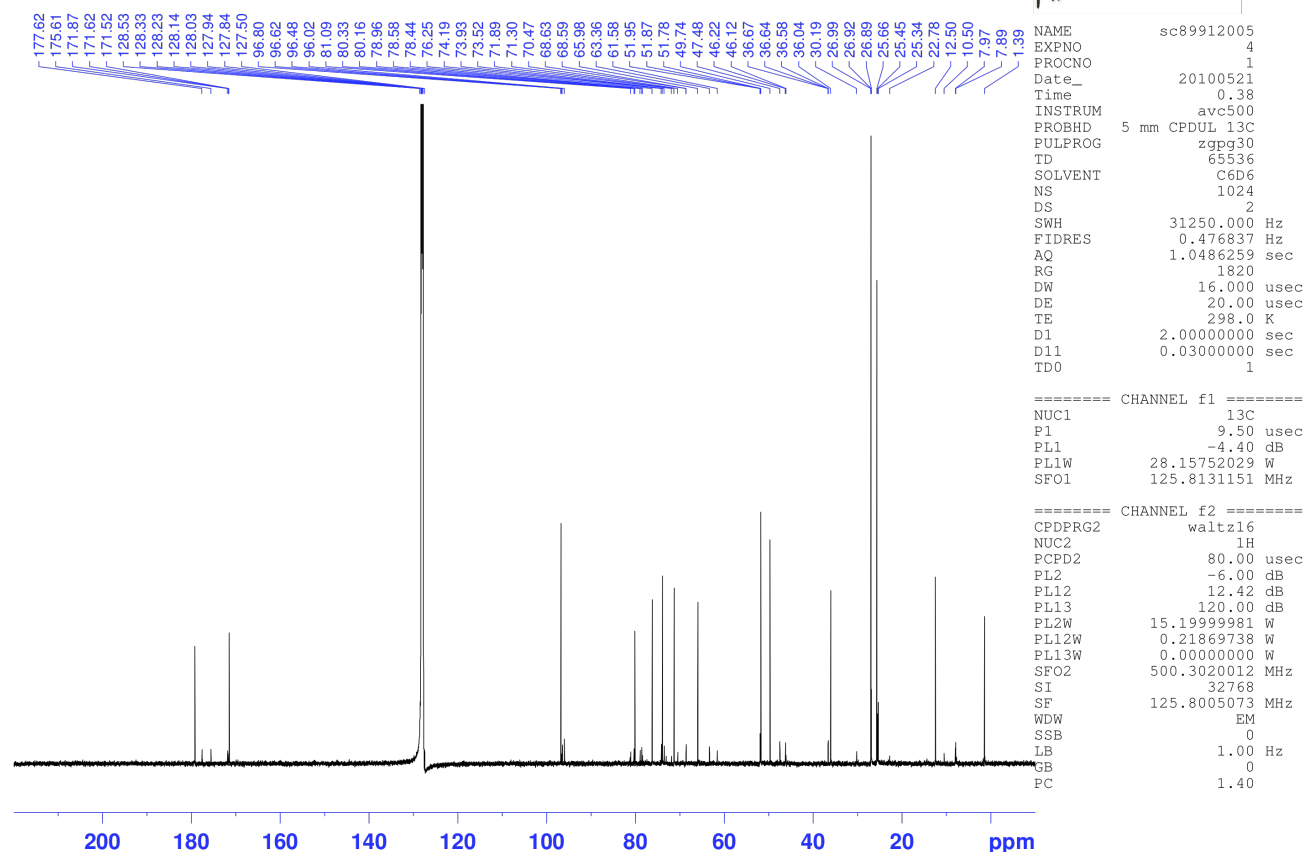

# **(2*R*, 5*R*, 6*S*, 7*S*)-1-Aza-2-(*tert*-butyl)-6-hydroxy-7-methyl-6-(benzyloxymethyl)-5-methoxycarbonyl-3-oxabicyclo[3.3.0]octane**

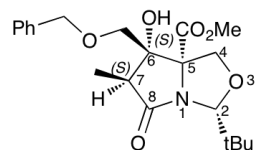

**23b**

Instrument AVC500  
Group MGM  
8992 Sonia Chau 19/5/10

NMROCHEM.OX

NAME sc89921905  
EXPNO 1  
PROCNO 1  
Date\_ 20100519  
Time 9.48  
INSTRUM avc500  
PROBHD 5 mm CPDUL 13C  
PULPROG zg30  
TD 65536  
SOLVENT C6D6  
NS 16  
DS 2  
SWH 10330.578 Hz  
FIDRES 0.157632 Hz  
AQ 3.1719923 sec  
RG 4  
DW 48.400 usec  
DE 6.00 usec  
TE 298.0 K  
D1 1.00000000 sec  
TD0 1

----- CHANNEL f1 -----  
NUC1 1H  
P1 9.60 usec  
PL1 -6.00 dB  
PL1W 15.19999981 W  
SFO1 500.3030896 MHz  
SI 32768  
SF 500.3000000 MHz  
WDW EM  
SSB 0  
LB 0.30 Hz  
GB 0  
PC 1.00

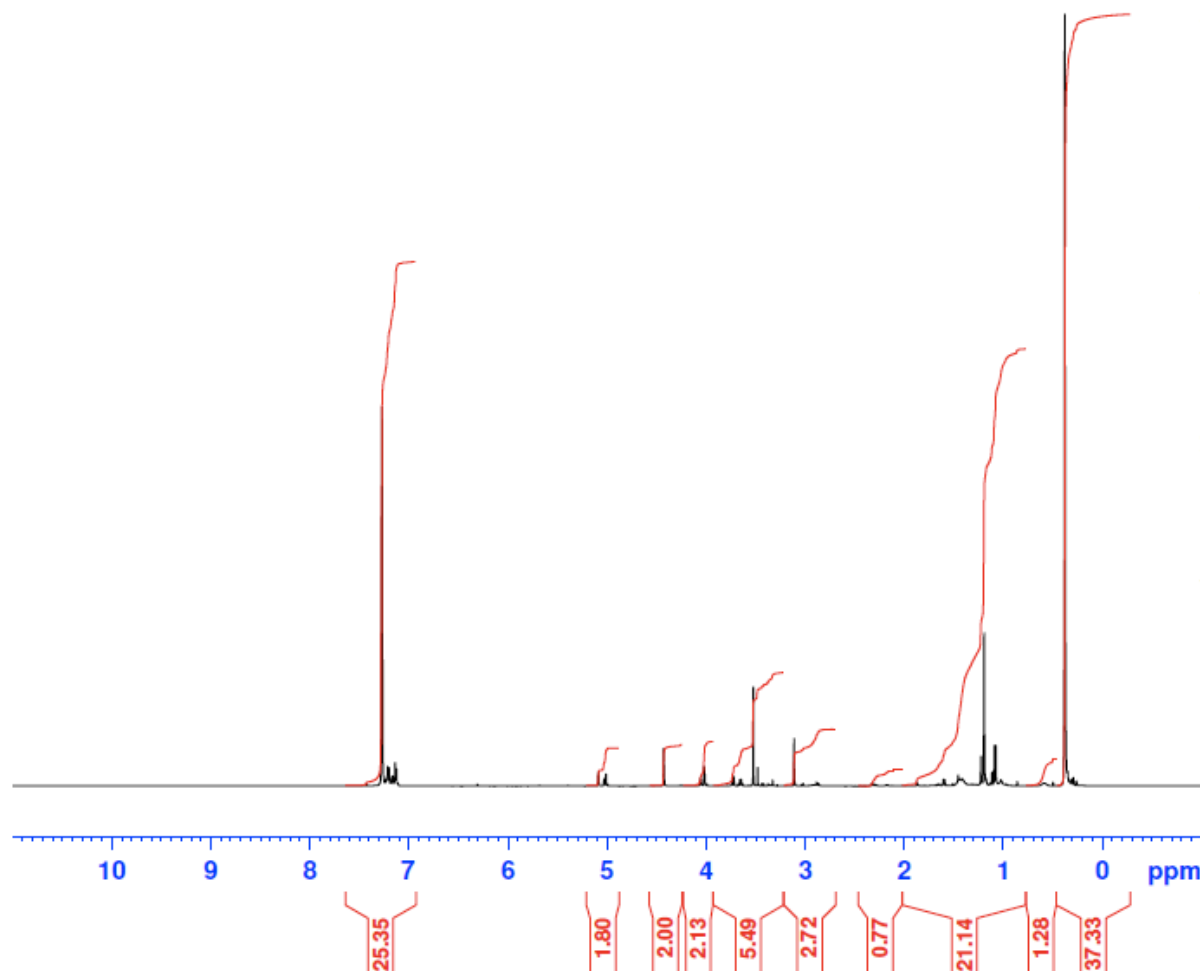

# (2R, 5R, 6S, 7S)-1-Aza-2-(*tert*-butyl)-6-hydroxy-7-methyl-6-(benzyloxymethyl)-5-methoxycarbonyl-3-oxabicyclo[3.3.0]octane

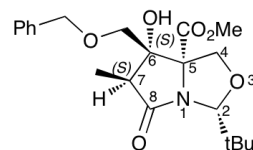

**23b**

Instrument AVC500  
Group MGM  
8992 Sonia Chau 19/5/10

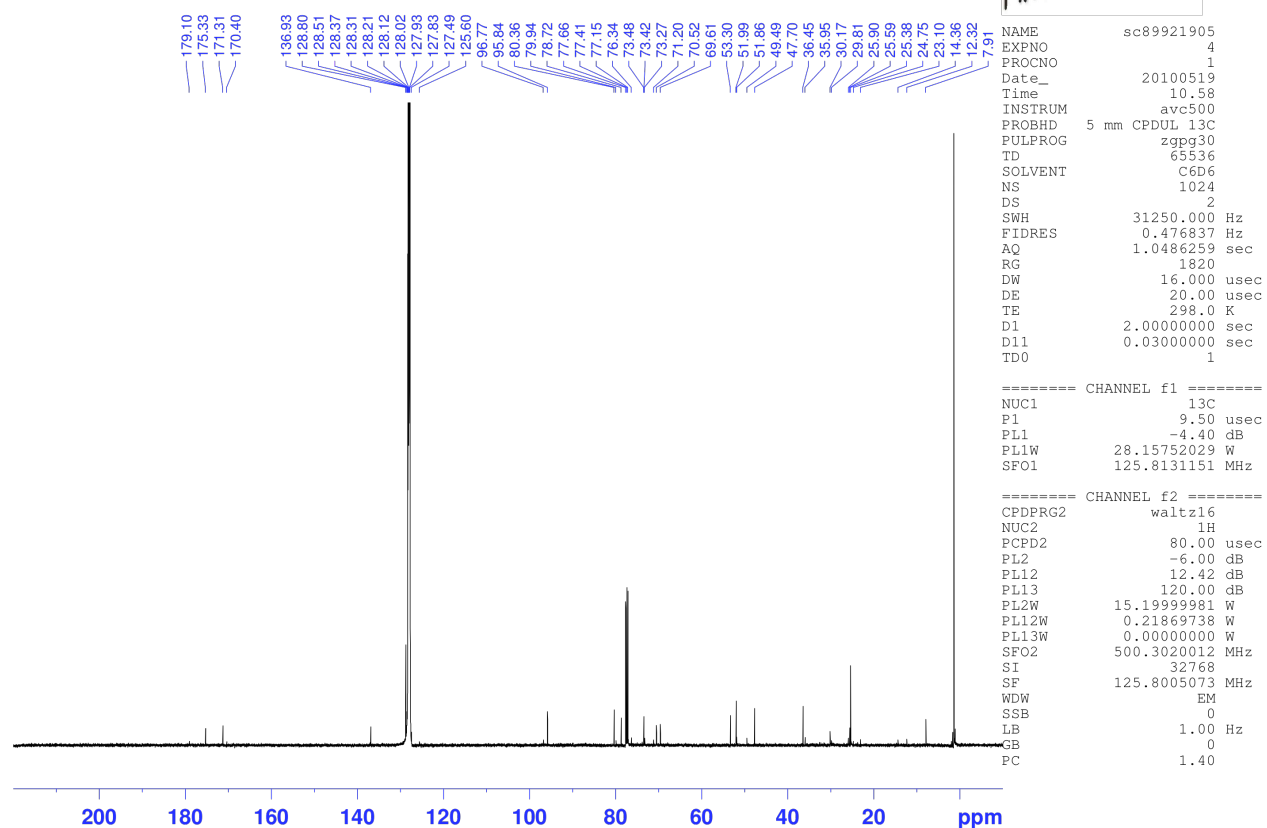

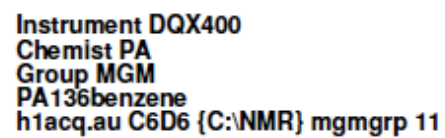

Instrument DQX400  
Chemist PA  
Group MGM  
PA136benzene  
c13acq.au C6D6 {C:NMR} mgmgrp 11

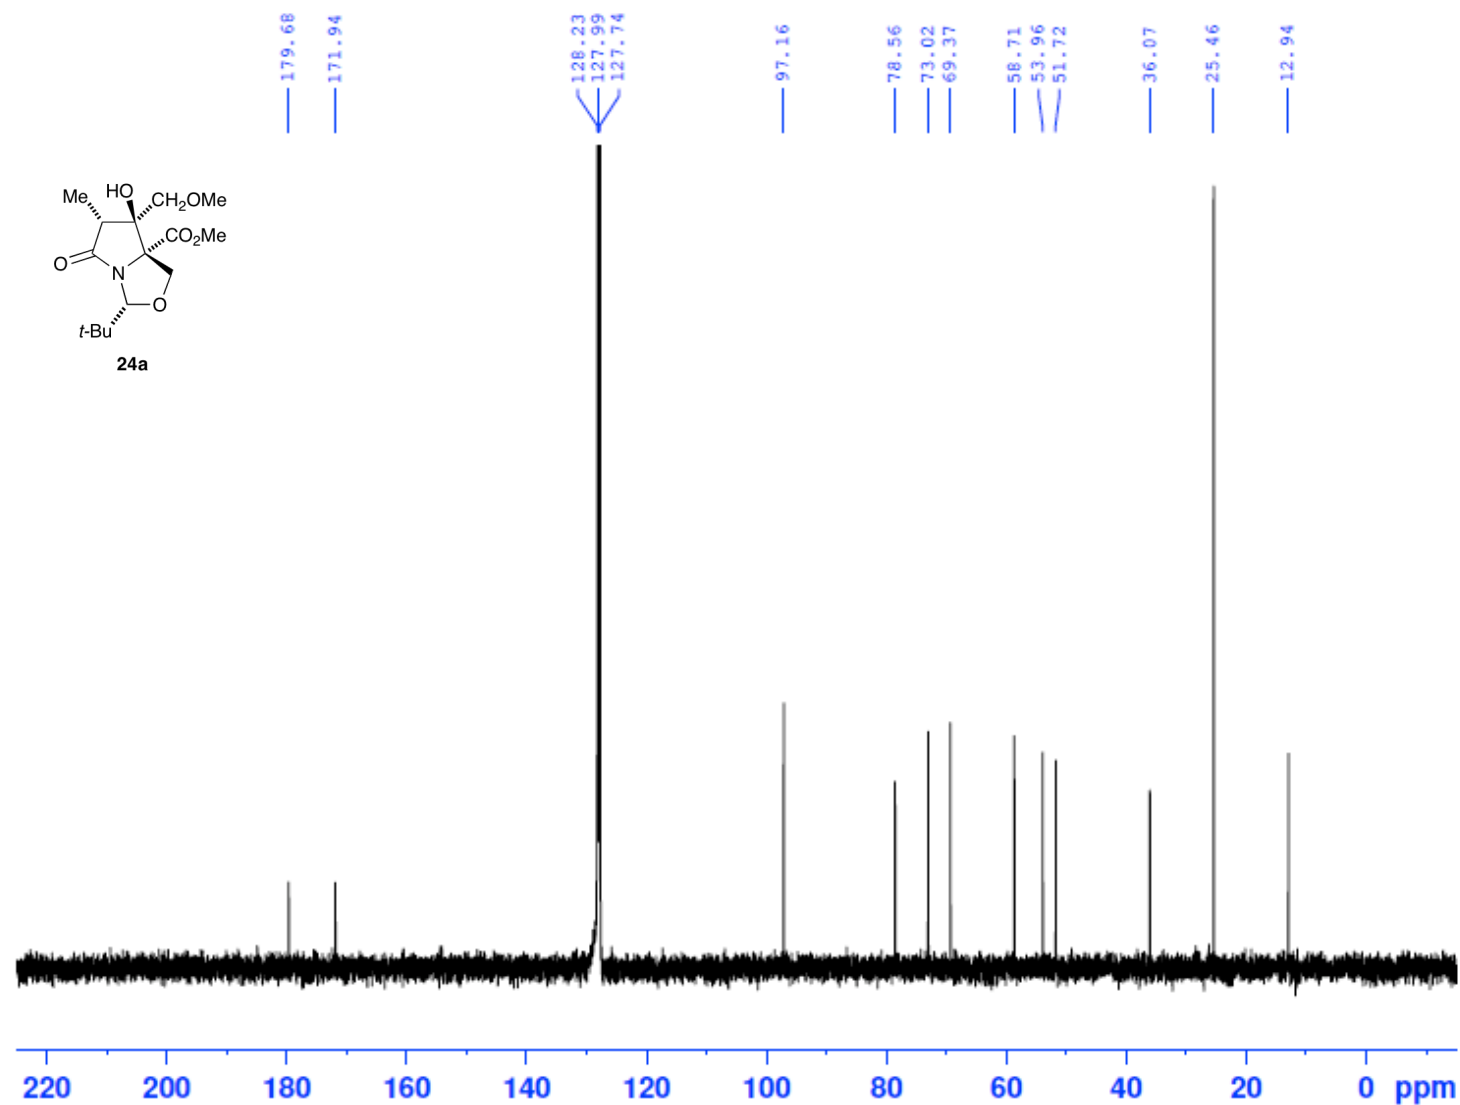

Instrument DQX400

Chemist PA

Group MGM

PA191B

h1acq.au C6D6 {E:\NMR2011} mgmgrp.3

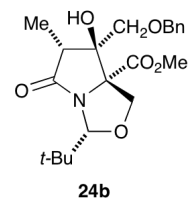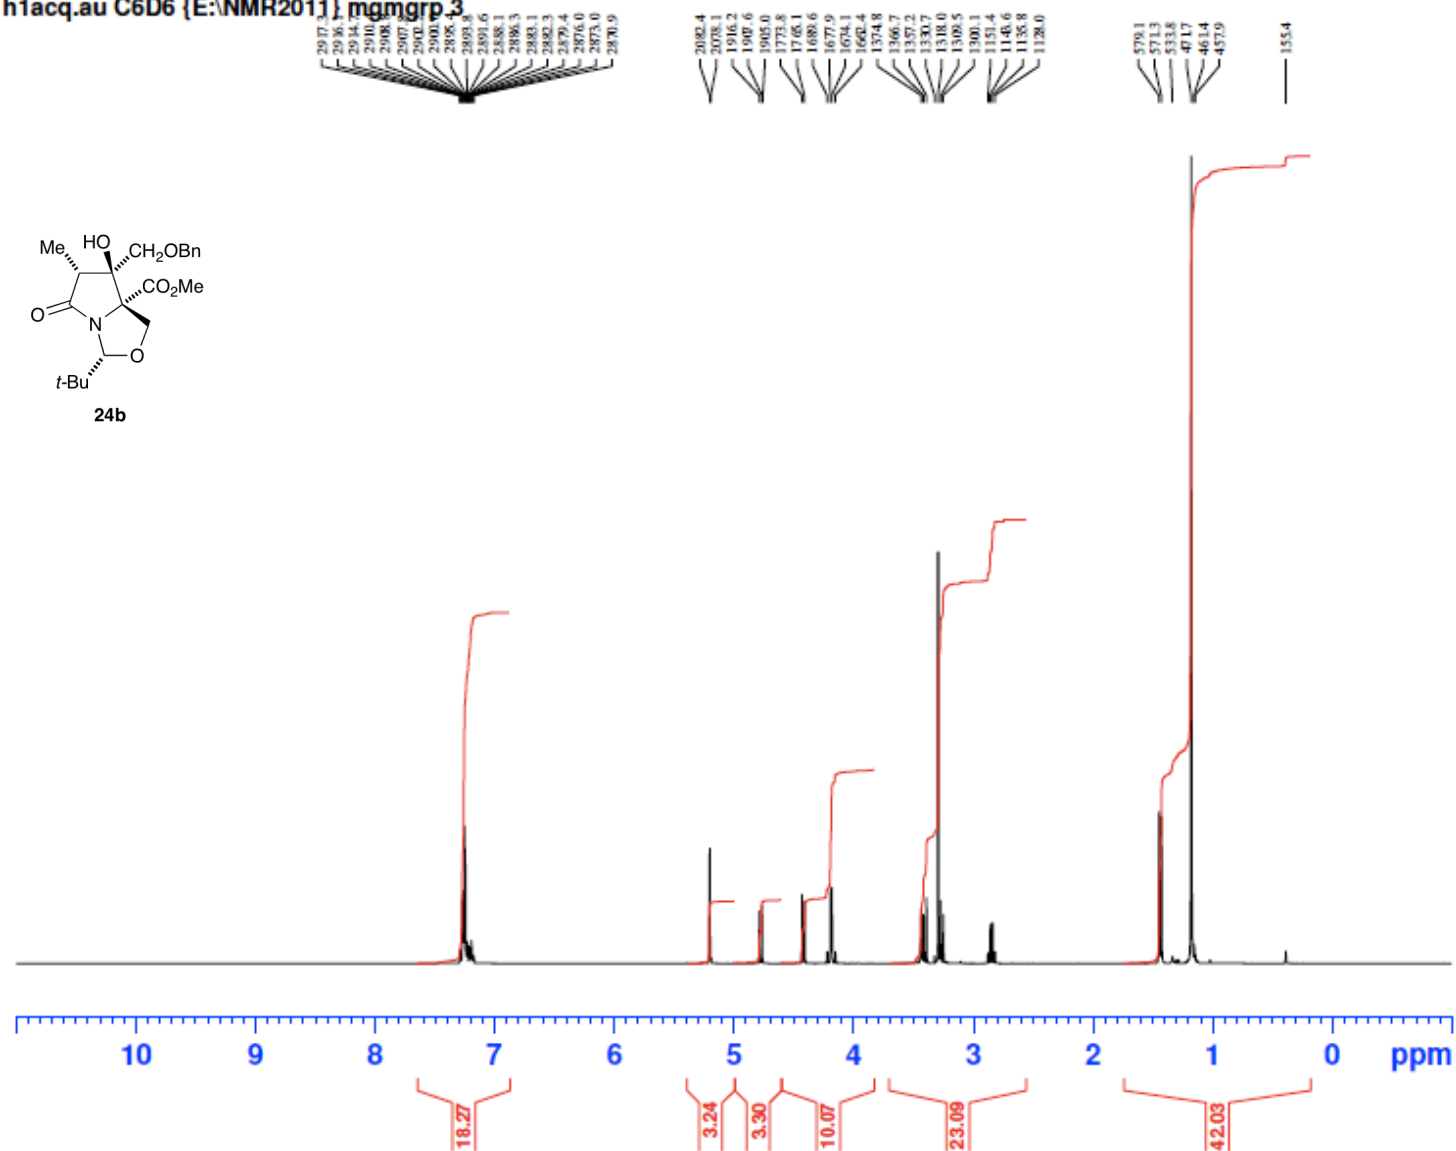





Instrument DQX400  
Chemist PA  
Group MGM  
PA160-154  
h1acq.au MeOD (C:NMR) mgmgrp 13

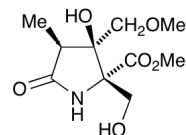

25a

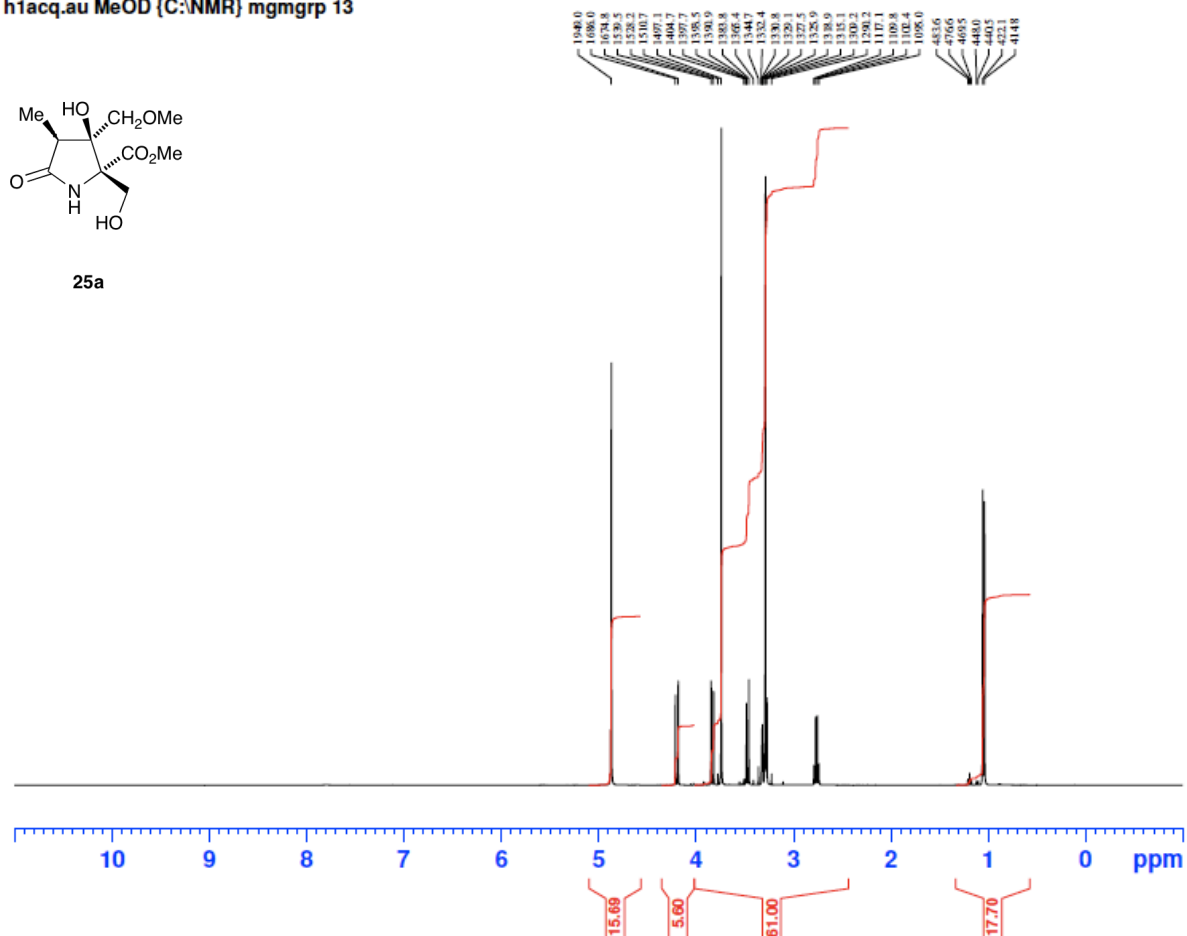

NMR@CHEM.OX

NAME Nov18-2010-13  
EXPNO 1  
PROCNO 1  
Date\_ 20101119  
Time 18.31  
INSTRUM av400  
PROBHD 5 mm QNP 1H/13  
PULPROG zg60  
TD 65536  
SOLVENT MeOD  
NS 16  
DS 2  
SWH 8278.146 Hz  
FIDRES 0.126314 Hz  
AQ 3.9584243 sec  
RG 90.5  
DW 60.400 usec  
DE 7.50 usec  
TE 300.0 K  
D1 1.00000000 sec

----- CHANNEL f1 -----  
NUC1 1H  
P1 9.00 usec  
PL1 0.00 dB  
SFO1 400.2024714 MHz  
SI 32768  
SF 400.2000000 MHz  
WDW EM  
SSB 0  
LB 0.30 Hz  
GB 0  
PC 1.00

Instrument DQX400  
Chemist PA  
Group MGM  
PA160-154  
c13acq.au MeOD {C:NMR} mgmgrp 13

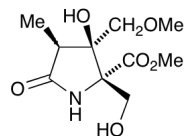

25a

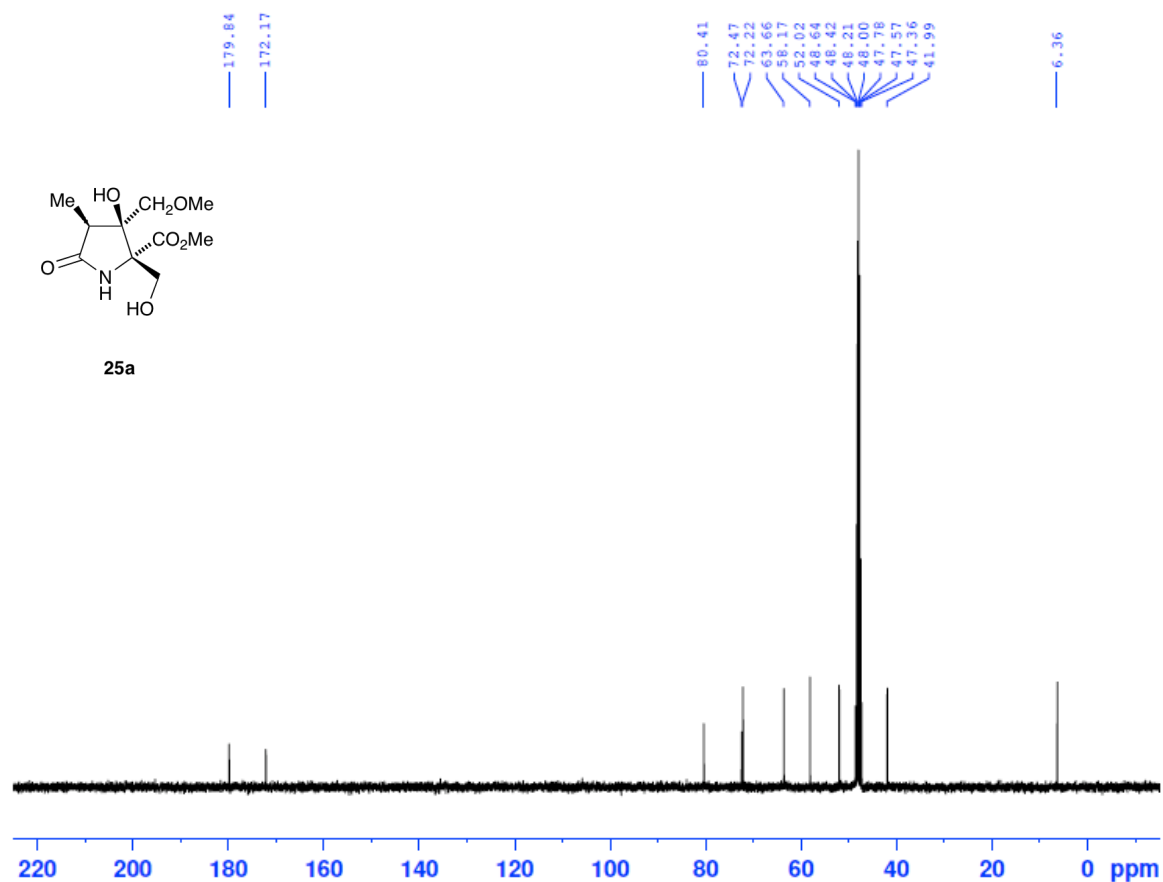

NMR@CHEM.OX

NAME Nov18-2010-13  
EXPNO 4  
PROCNO 1  
Date\_ 20101119  
Time 18.49  
INSTRUM av400  
PROBHD 5 mm QNP 1H/13  
PULPROG zgpg30  
TD 32768  
SOLVENT MeOD  
NS 256  
DS 4  
SWH 26178.010 Hz  
FIDRES 0.798889 Hz  
AQ 0.6259188 sec  
RG 32768  
DW 19.100 usec  
DE 7.50 usec  
TE 300.0 K  
D1 1.00000000 sec  
D11 0.03000000 sec  
TD0 1

----- CHANNEL f1 -----  
NUC1 13C  
P1 9.50 usec  
PL1 0.00 dB  
SFO1 100.6403931 MHz

----- CHANNEL f2 -----  
CPDPRG2 waltz16  
NUC2 1H  
PCPD2 80.00 usec  
PL2 0.00 dB  
PL12 19.00 dB  
PL13 25.00 dB  
SFO2 400.2016008 MHz  
SI 32768  
SF 100.6303300 MHz  
WDW EM  
SSB 0  
LB 1.00 Hz  
GB 0  
PC 1.40



Instrument DQX400  
Chemist PA  
Group MGM  
PA184B  
c13acq.au CDCl3 {E:NMR2011} mgmgrp 57

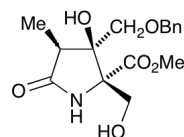

**25b**

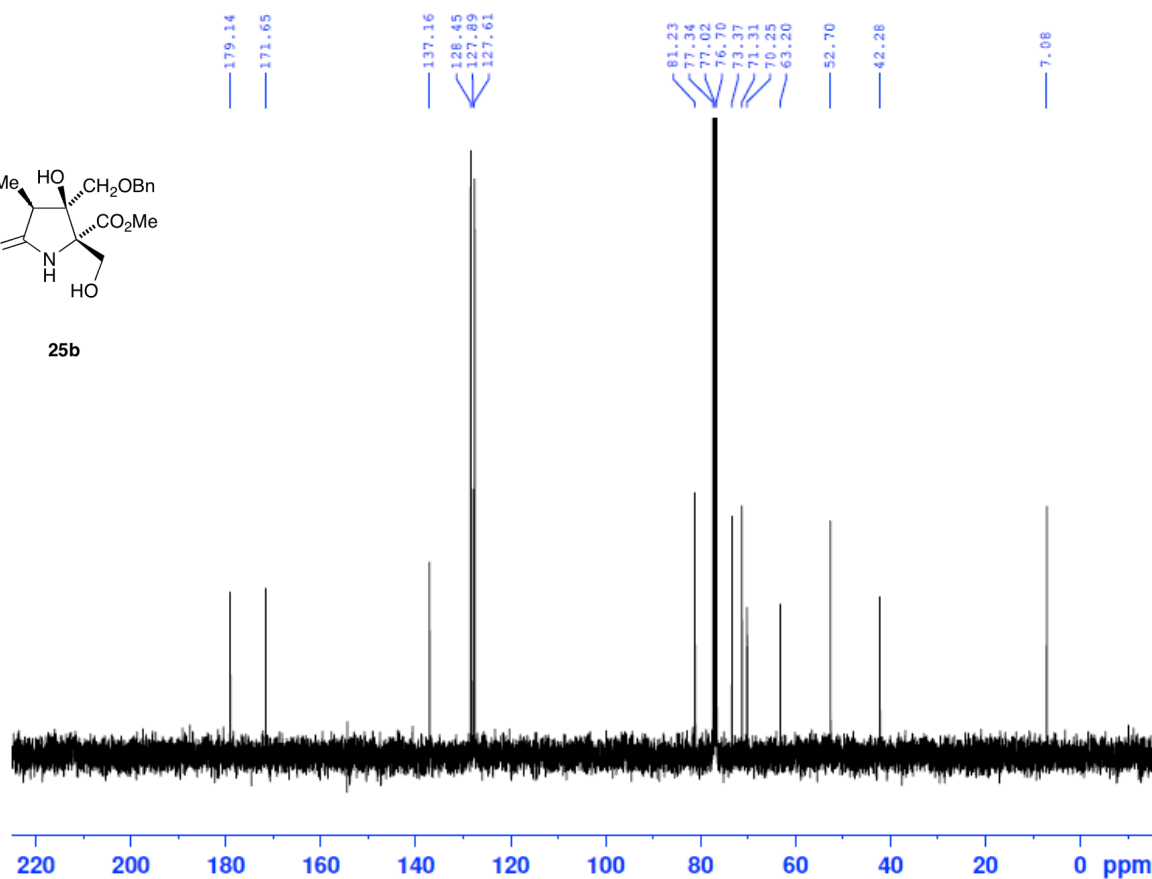

NMR@CHEM.OX

NAME Feb07-2011-57  
EXPNO 2  
PROCNO 1  
Date\_ 20110208  
Time 16.50  
INSTRUM av400  
PROBHD 5 mm QNP 1H/13  
PULPROG zgpg30  
TD 32768  
SOLVENT CDCl3  
NS 256  
DS 4  
SWH 26178.010 Hz  
FIDRES 0.798889 Hz  
AQ 0.6259188 sec  
RG 32768  
DW 19.100 usec  
DE 7.50 usec  
TE 300.0 K  
D1 1.00000000 sec  
D11 0.03000000 sec  
TD0 1

----- CHANNEL f1 -----  
NUC1 13C  
P1 9.50 usec  
PL1 0.00 dB  
SFO1 100.6403931 MHz

----- CHANNEL f2 -----  
CPDPRG2 waltz16  
NUC2 1H  
PCPD2 80.00 usec  
PL2 0.00 dB  
PL12 19.00 dB  
PL13 25.00 dB  
SFO2 400.2016008 MHz  
SI 32768  
SF 100.6303718 MHz  
WDW EM  
SSB 0  
LB 1.00 Hz  
GB 0  
PC 1.40

Instrument DQX400  
Chemist PA  
Group MGM  
PA146A  
h1acq.au CDCl<sub>3</sub> (C:NMR) mgmgrp 28

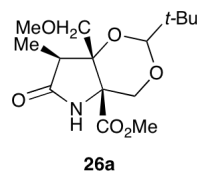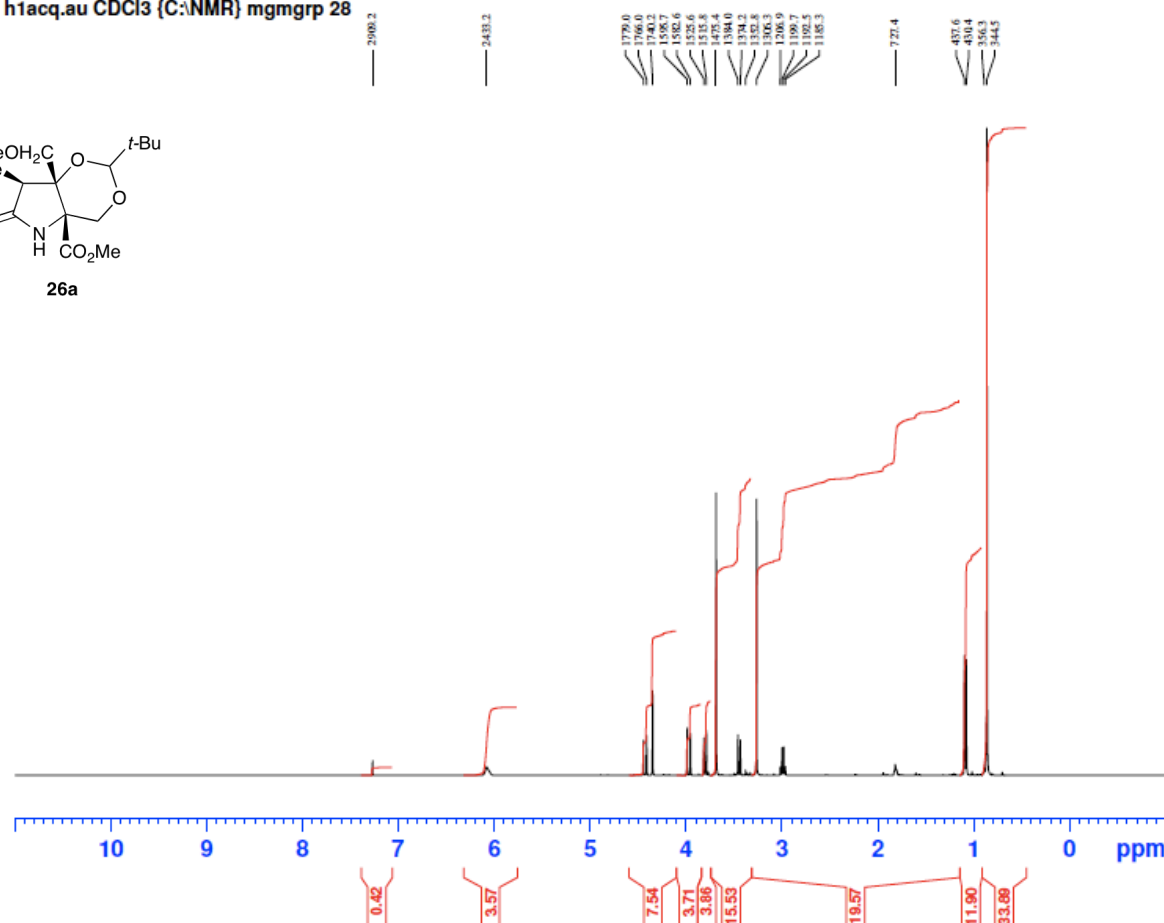

NMR@CHEM.OX

NAME Oct23-2010-28  
EXPNO 1  
PROCNO 1  
Date\_ 20101023  
Time 18.14  
INSTRUM av400  
PROBHD 5 mm QNP 1H/13  
PULPROG zg60  
TD 65536  
SOLVENT CDCl<sub>3</sub>  
NS 16  
DS 2  
SWH 8278.146 Hz  
FIDRES 0.126314 Hz  
AQ 3.9584243 sec  
RG 90.5  
DW 60.400 usec  
DE 7.50 usec  
TE 300.0 K  
D1 1.00000000 sec

----- CHANNEL f1 -----  
NUC1 1H  
P1 9.00 usec  
PL1 0.00 dB  
SFO1 400.2024714 MHz  
SI 32768  
SF 400.2000028 MHz  
WDW EM  
SSB 0  
LB 0.30 Hz  
GB 0  
PC 1.00

Instrument DQX400  
Chemist PA  
Group MGM  
PA146A  
c13acq.au CDCl<sub>3</sub> {C:NMR} mgmgrp 28

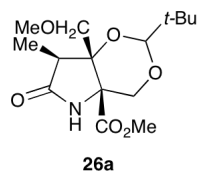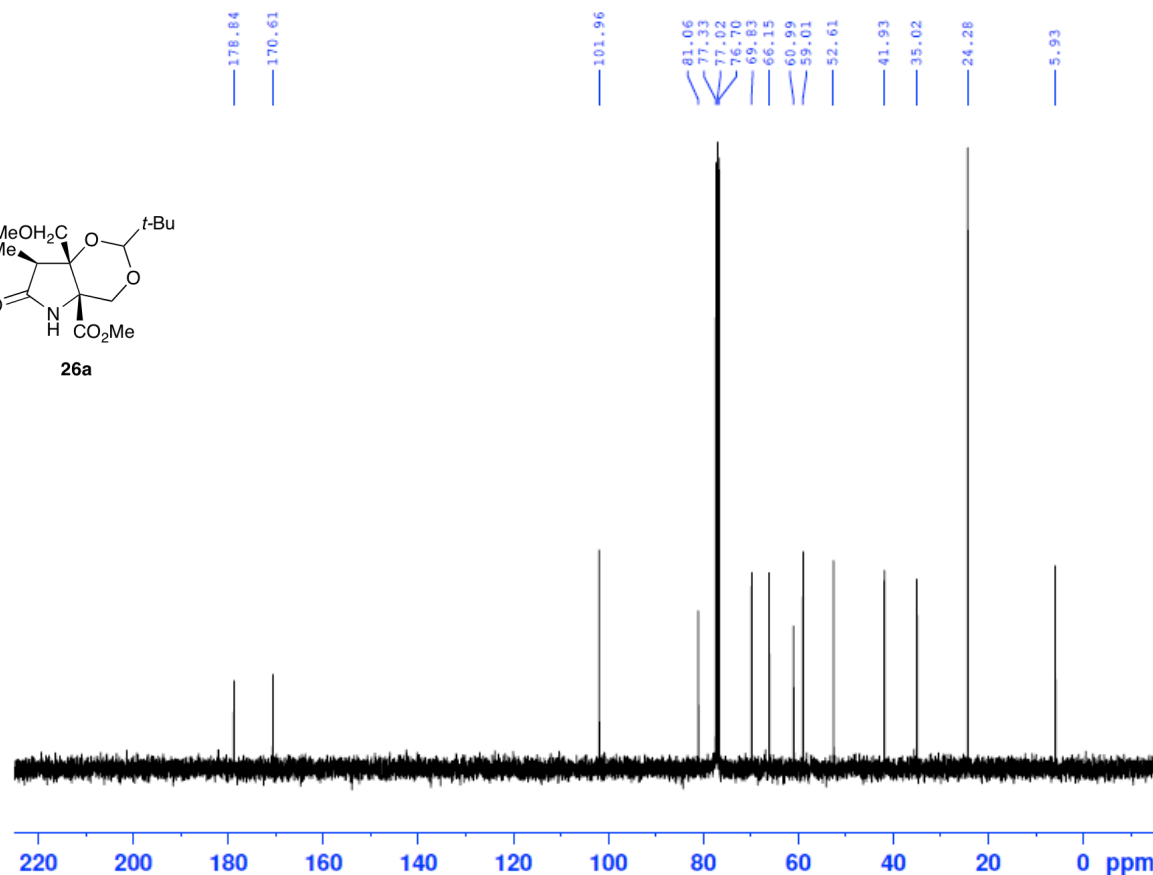

NMR@CHEM.OX

NAME Oct23-2010-28  
EXPNO 4  
PROCNO 1  
Date\_ 20101023  
Time 18.31  
INSTRUM av400  
PROBHD 5 mm QNP 1H/13  
PULPROG zgpg30  
TD 32768  
SOLVENT CDCl<sub>3</sub>  
NS 256  
DS 4  
SWH 26178.010 Hz  
FIDRES 0.798889 Hz  
AQ 0.6259188 sec  
RG 32768  
DW 19.100 usec  
DE 7.50 usec  
TE 300.0 K  
D1 1.00000000 sec  
D11 0.03000000 sec  
TD0 1

----- CHANNEL f1 -----  
NUC1 13C  
P1 9.50 usec  
PL1 0.00 dB  
SFO1 100.6403931 MHz

----- CHANNEL f2 -----  
CPDPRG2 waltz16  
NUC2 1H  
PCPD2 80.00 usec  
PL2 0.00 dB  
PL12 19.00 dB  
PL13 25.00 dB  
SFO2 400.2016008 MHz  
SI 32768  
SF 100.6303718 MHz  
WDW EM  
SSB 0  
LB 1.00 Hz  
GB 0  
PC 1.40



Instrument DQX400  
Chemist PA  
Group MGM  
PA184A  
c13acq.au CDCl3 {E:\NMR2011} mgmgrp 13

NMR@CHEM.OX

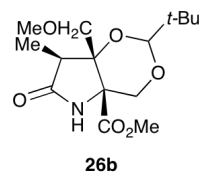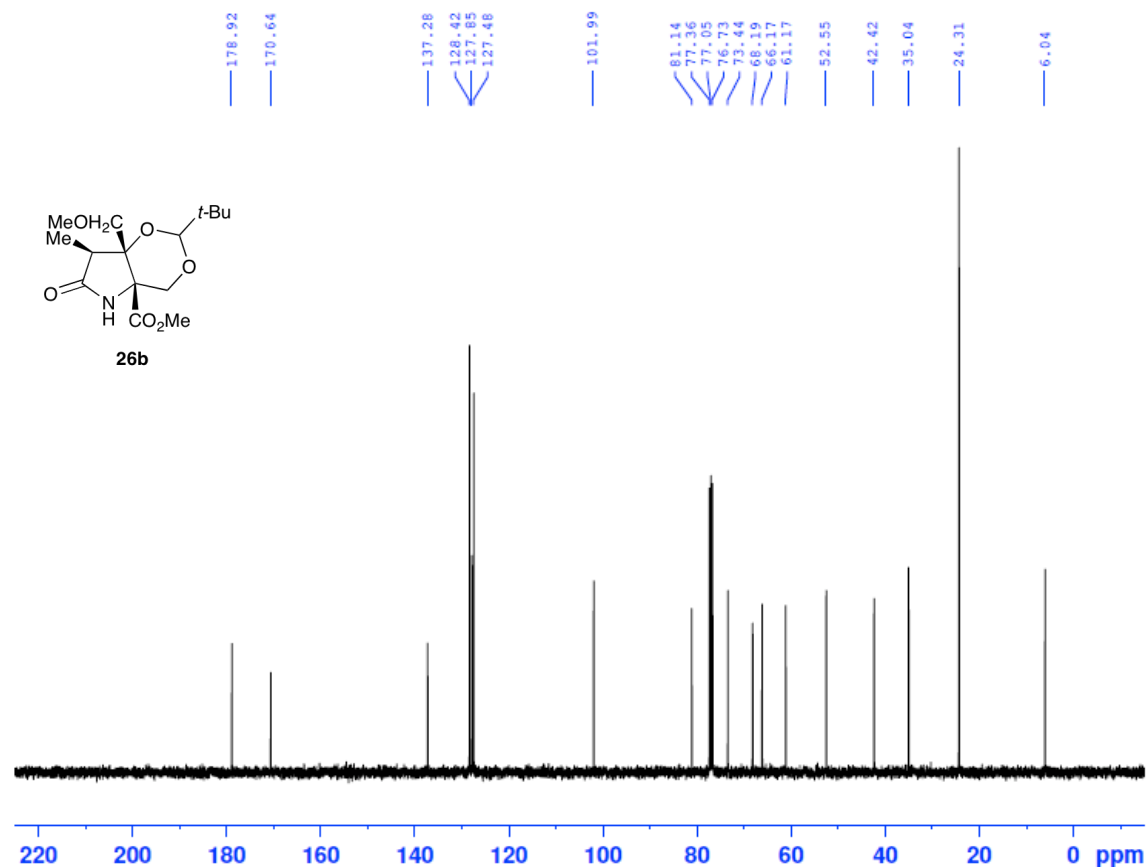

NAME Feb08-2011-13  
EXPNO 2  
PROCNO 1  
Date\_ 20110208  
Time 23.19  
INSTRUM av400  
PROBHD 5 mm QNP 1H/13  
PULPROG zgpg30  
TD 32768  
SOLVENT CDCl3  
NS 256  
DS 4  
SWH 26178.010 Hz  
FIDRES 0.798889 Hz  
AQ 0.6259188 sec  
RG 32768  
DW 19.100 usec  
DE 7.50 usec  
TE 300.0 K  
D1 1.00000000 sec  
D11 0.03000000 sec  
TD0 1

----- CHANNEL f1 -----  
NUC1 13C  
P1 9.50 usec  
PL1 0.00 dB  
SFO1 100.6403931 MHz

----- CHANNEL f2 -----  
CPDPRG2 waltz16  
NUC2 1H  
PCPD2 80.00 usec  
PL2 0.00 dB  
PL12 19.00 dB  
PL13 25.00 dB  
SFO2 400.2016008 MHz  
SI 32768  
SF 100.6303718 MHz  
WDW EM  
SSE 0  
LB 1.00 Hz  
GB 0  
PC 1.40



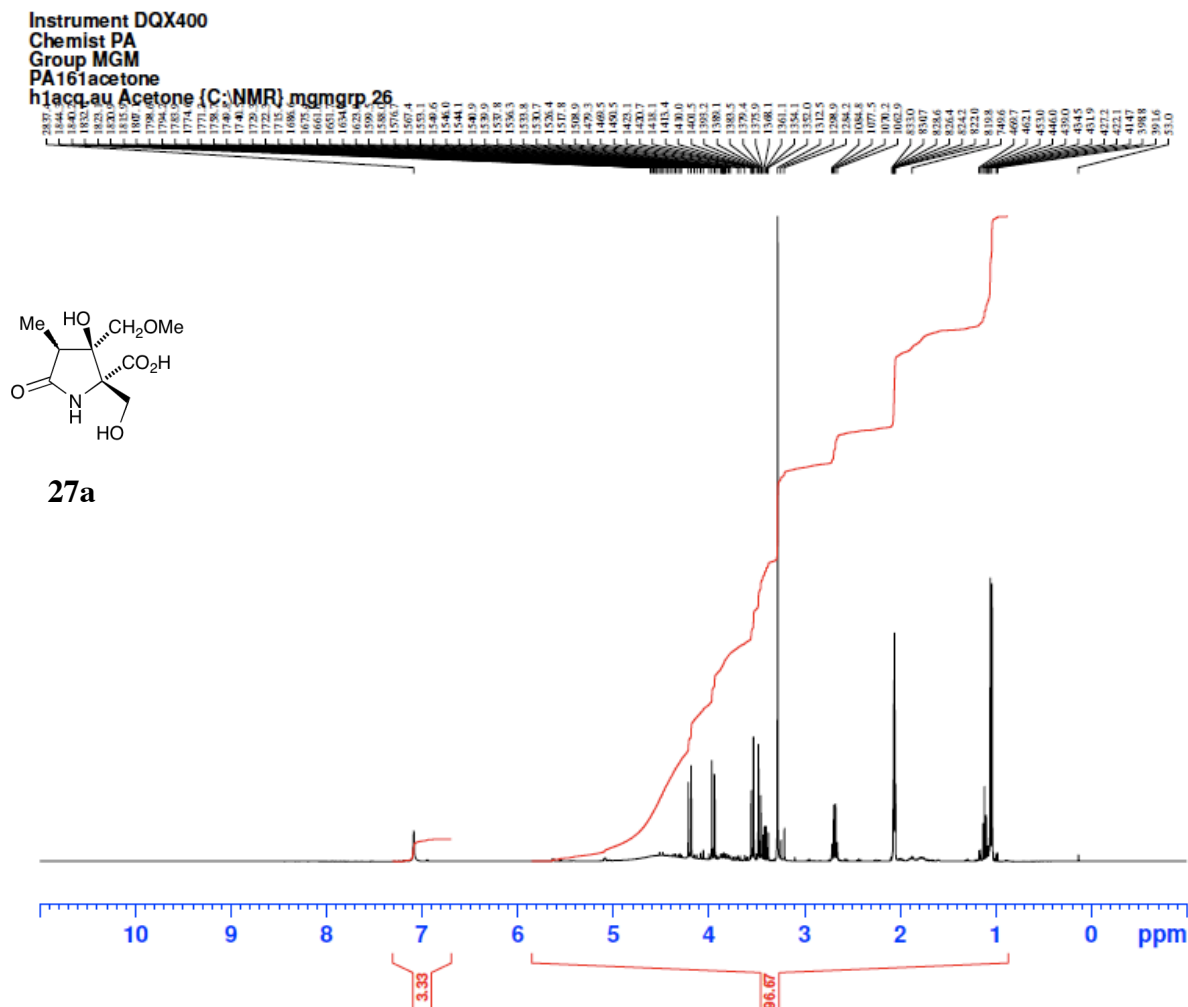

NMR@CHEM.OX

|         |                |
|---------|----------------|
| NAME    | Nov23-2010-26  |
| EXPNO   | 1              |
| PROCNO  | 1              |
| Date_   | 20101124       |
| Time    | 9.08           |
| INSTRUM | av400          |
| PROBHD  | 5 mm QNP 1H/13 |
| PULPROG | zg60           |
| TD      | 65536          |
| SOLVENT | Acetone        |
| NS      | 16             |
| DS      | 2              |
| SWH     | 8278.146 Hz    |
| FIDRES  | 0.126314 Hz    |
| AQ      | 3.9584243 sec  |
| RG      | 90.5           |
| DW      | 60.400 usec    |
| DE      | 7.50 usec      |
| TE      | 300.0 K        |
| D1      | 1.00000000 sec |

  

|                        |                 |
|------------------------|-----------------|
| ----- CHANNEL f1 ----- |                 |
| NUC1                   | 13C             |
| P1                     | 9.00 usec       |
| PL1                    | 0.00 dB         |
| SFO1                   | 400.2024714 MHz |
| SI                     | 32768           |
| SF                     | 400.2000000 MHz |
| WDW                    | EM              |
| SSB                    | 0               |
| LB                     | 0.30 Hz         |
| GB                     | 0               |
| PC                     | 1.00            |

Instrument DQX400  
Chemist PA  
Group MGM  
PA161acetone  
c13acq.au Acetone (C:\NMR) mgmgrp 26

NMR@CHEM.OX

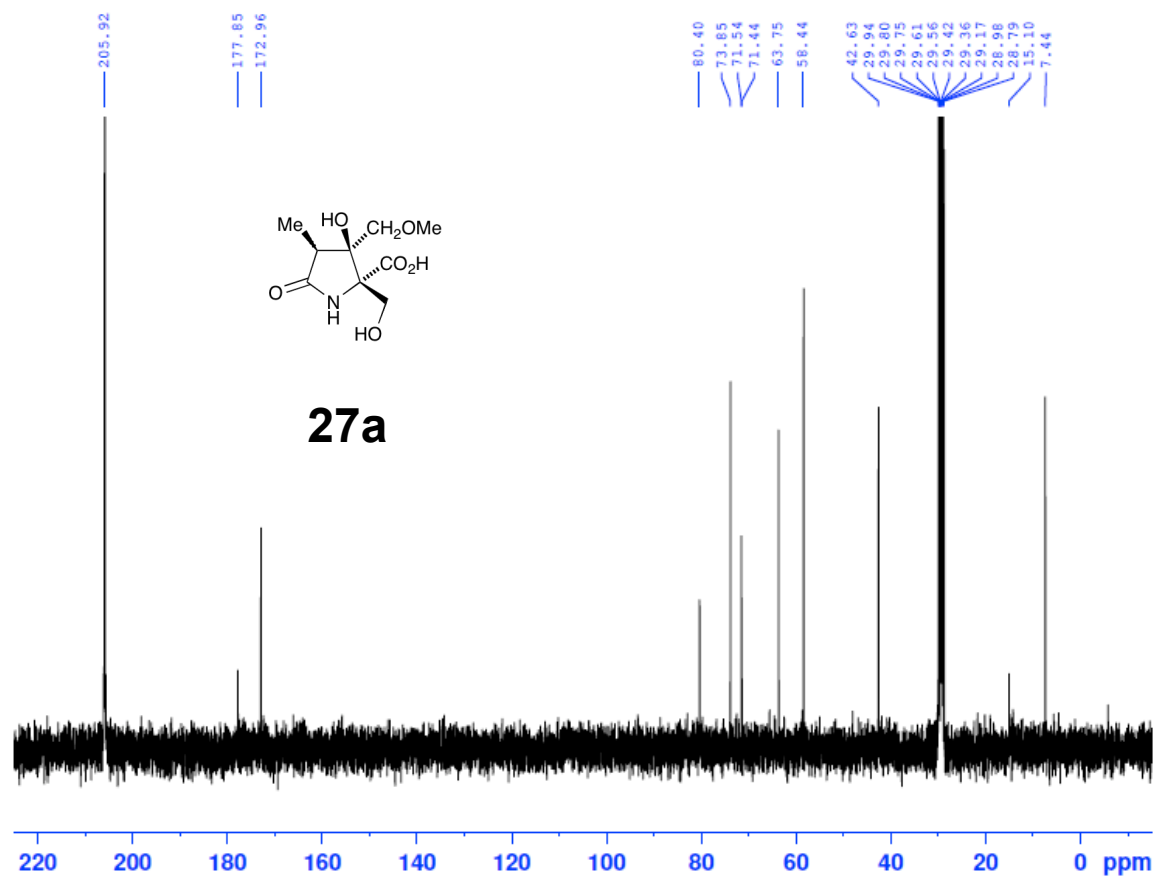

NAME Nov23-2010-26  
EXPNO 4  
PROCNO 1  
Date\_ 20101124  
Time 9.25  
INSTRUM av400  
PROBHD 5 mm QNP 1H/13  
PULPROG zgpg30  
TD 32768  
SOLVENT Acetone  
NS 256  
DS 4  
SWH 26178.010 Hz  
FIDRES 0.798889 Hz  
AQ 0.6259188 sec  
RG 32768  
DW 19.100 usec  
DE 7.50 usec  
TE 300.0 K  
D1 1.00000000 sec  
D11 0.03000000 sec  
TD0 1

----- CHANNEL f1 -----  
NUC1 13C  
P1 9.50 usec  
PL1 0.00 dB  
SFO1 100.6403931 MHz

----- CHANNEL f2 -----  
CPDPRG2 waltz16  
NUC2 1H  
PCPD2 80.00 usec  
PL2 0.00 dB  
PL12 19.00 dB  
PL13 25.00 dB  
SFO2 400.2016008 MHz  
SI 32768  
SF 100.6303300 MHz  
WDW EM  
SSB 0  
LB 1.00 Hz  
GB 0  
PC 1.40

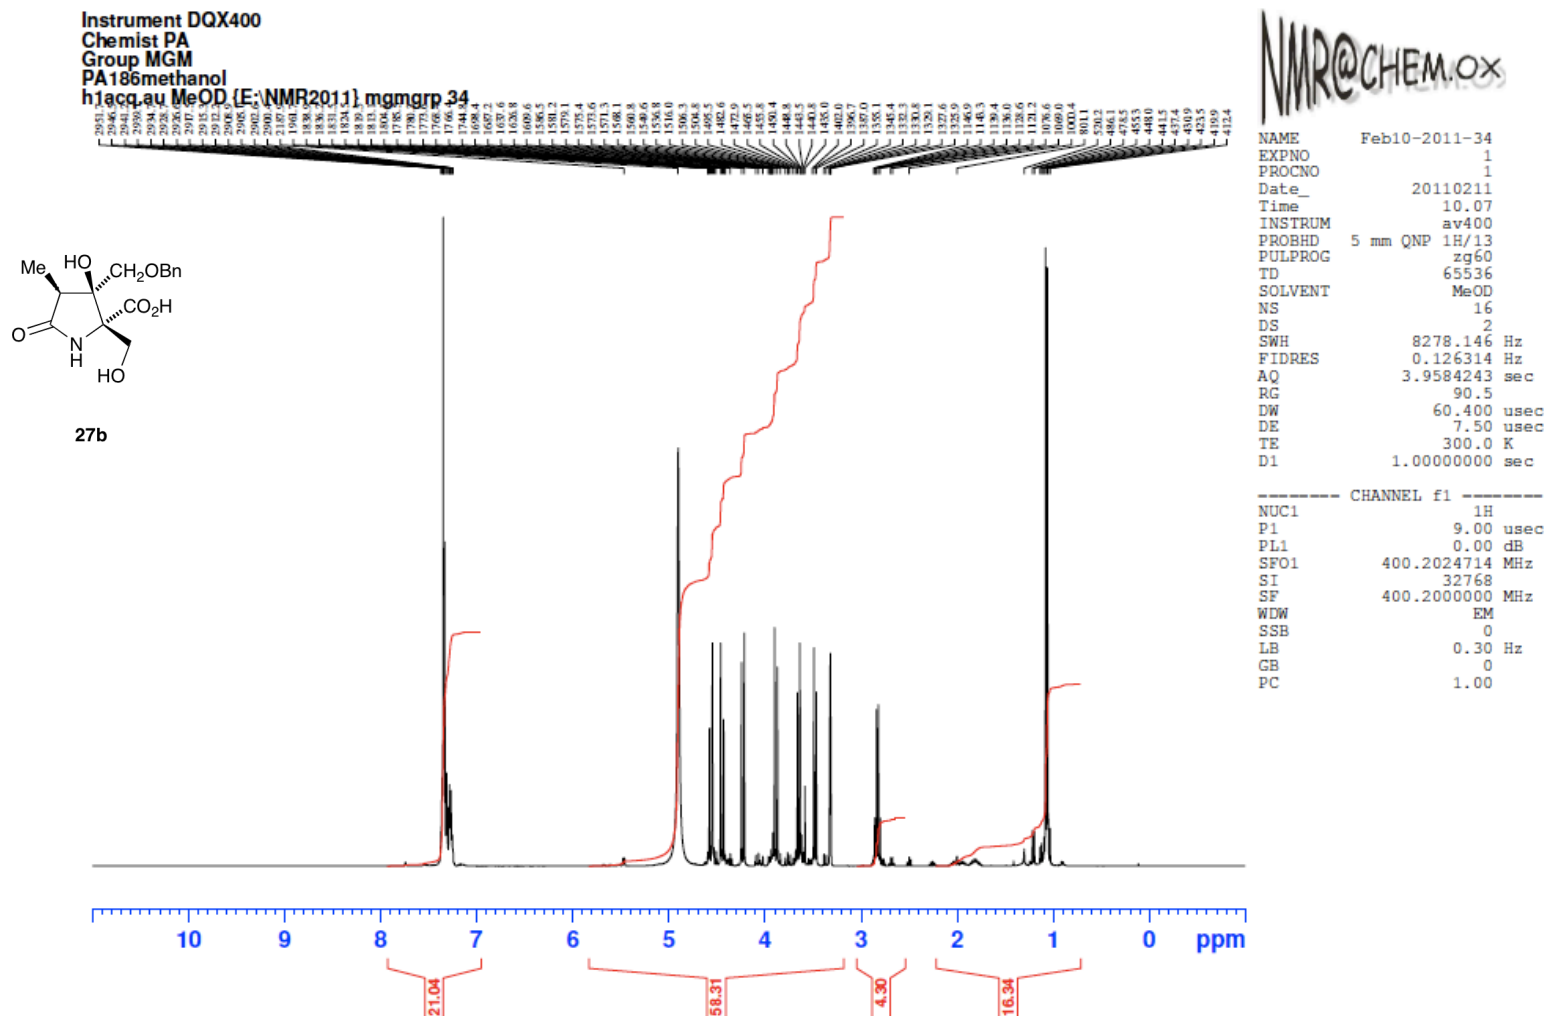

Instrument DQX400  
Chemist PA  
Group MGM  
PA186methanol  
c13acq.au MeOD {E:\NMR2011} mgmgrp 34

NMR@CHEM.OX

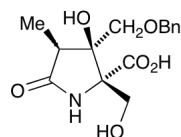

27b

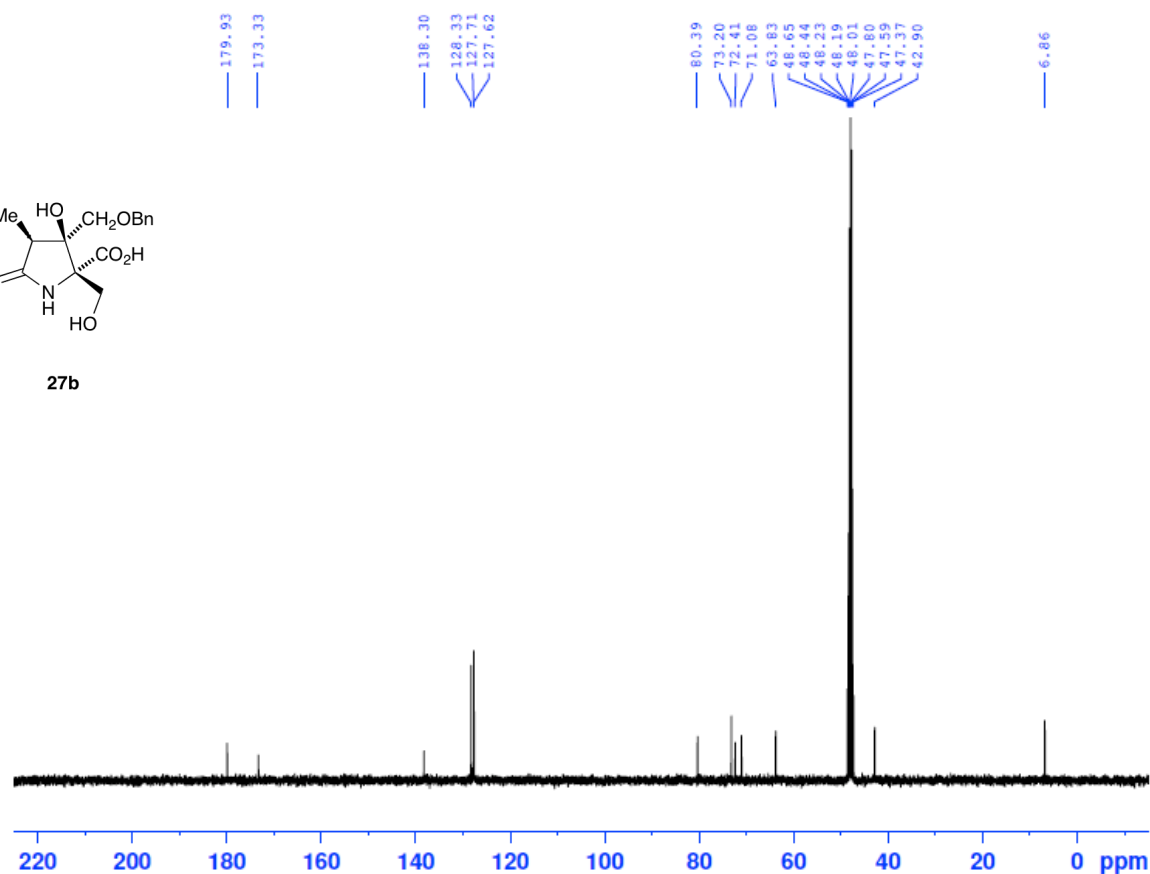

NAME Feb10-2011-34  
EXPNO 2  
PROCNO 1  
Date\_ 20110211  
Time 10.15  
INSTRUM av400  
PROBHD 5 mm QNP 1H/13  
PULPROG zgpg30  
TD 32768  
SOLVENT MeOD  
NS 256  
DS 4  
SWH 26178.010 Hz  
FIDRES 0.798889 Hz  
AQ 0.6259188 sec  
RG 32768  
DW 19.100 usec  
DE 7.50 usec  
TE 300.0 K  
D1 1.00000000 sec  
D11 0.03000000 sec  
TD0 1

----- CHANNEL f1 -----  
NUC1 13C  
P1 9.50 usec  
PL1 0.00 dB  
SFO1 100.6403931 MHz

----- CHANNEL f2 -----  
CPDPRG2 waltz16  
NUC2 1H  
PCPD2 80.00 usec  
PL2 0.00 dB  
PL12 19.00 dB  
PL13 25.00 dB  
SFO2 400.2016008 MHz  
SI 32768  
SF 100.6303300 MHz  
WDW EM  
SSB 0  
LB 1.00 Hz  
GB 0  
PC 1.40



Instrument DQX400  
Chemist PA  
Group MGM  
PA192  
c13acq.au CDCl<sub>3</sub> {E1:NMR2011} mgmgrp 58

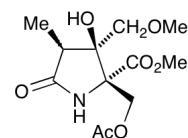

28a

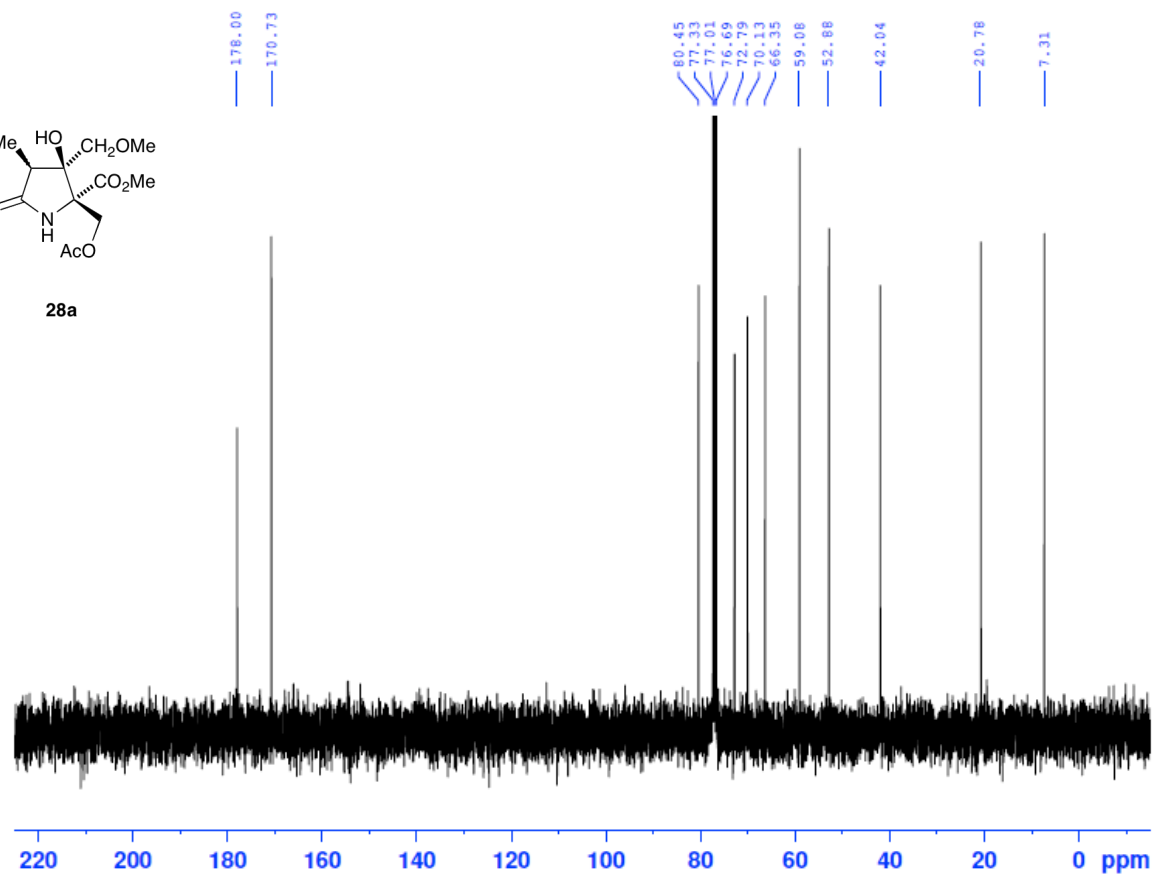

NMR@CHEM.OX

NAME Feb16-2011-58  
EXPNO 2  
PROCNO 1  
Date\_ 20110217  
Time\_ 9.37  
INSTRUM av400  
PROBHD 5 mm QNP 1H/13  
PULPROG zgpg30  
TD 32768  
SOLVENT CDCl<sub>3</sub>  
NS 256  
DS 4  
SWH 26178.010 Hz  
FIDRES 0.798889 Hz  
AQ 0.6259188 sec  
RG 32768  
DW 19.100 usec  
DE 7.50 usec  
TE 300.0 K  
D1 1.00000000 sec  
D11 0.03000000 sec  
TD0 1

----- CHANNEL f1 -----  
NUC1 13C  
P1 9.50 usec  
PL1 0.00 dB  
SFO1 100.6403931 MHz

----- CHANNEL f2 -----  
CPDPRG2 waltz16  
NUC2 1H  
PCPD2 80.00 usec  
PL2 0.00 dB  
PL12 19.00 dB  
PL13 25.00 dB  
SFO2 400.2016008 MHz  
SI 32768  
SF 100.6303718 MHz  
WDW EM  
SSB 0  
LB 1.00 Hz  
GB 0  
PC 1.40

Instrument DQX400  
Chemist PA  
Group MGM  
PA197crude  
h1acq.au CDCl3 (E:\NMR2011)\mgmgrp 4

NMR@CHEM.OX

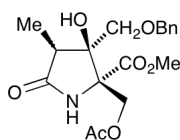

28b

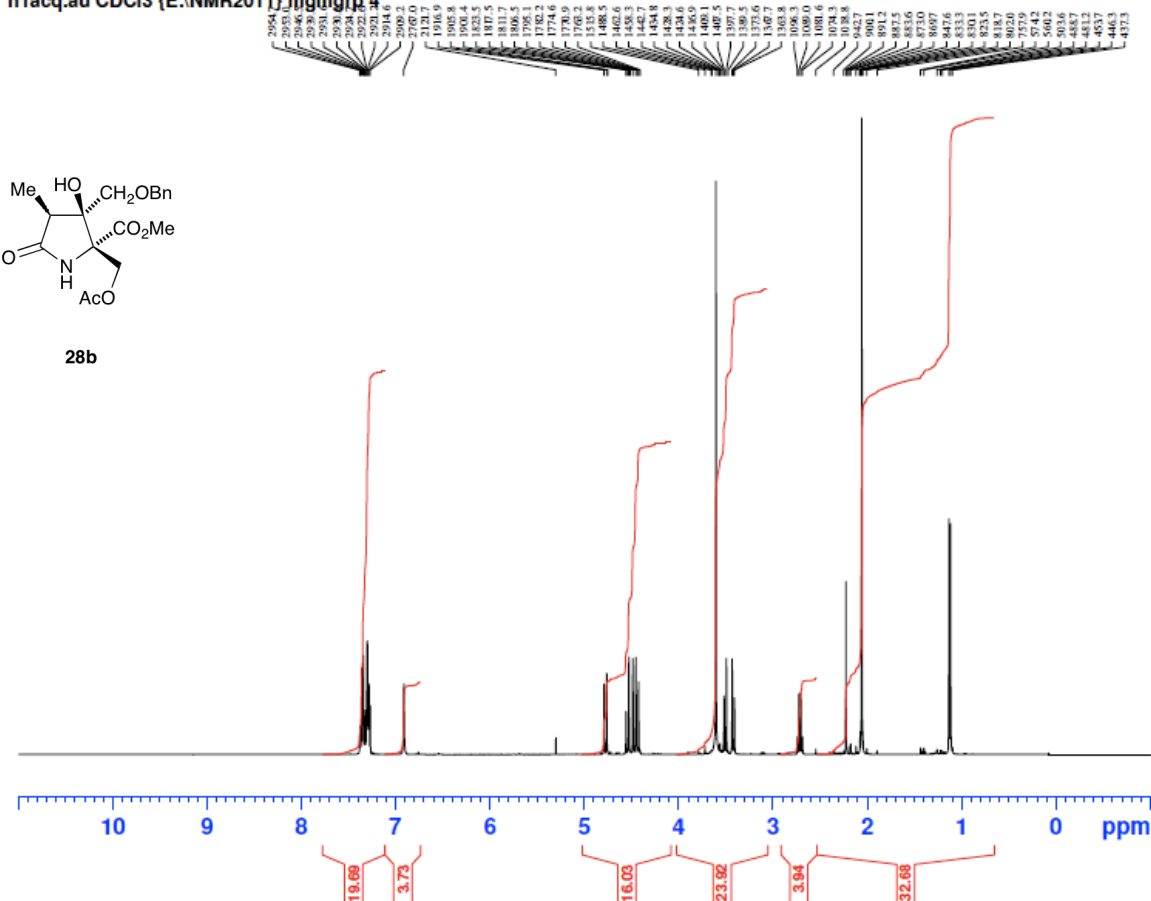

NAME Feb22-2011-4  
EXPNO 1  
PROCNO 1  
Date\_ 20110222  
Time 18.14  
INSTRUM av400  
PROBHD 5 mm QNP 1H/13  
PULPROG zg60  
TD 65536  
SOLVENT CDCl3  
NS 16  
DS 2  
SWH 8278.146 Hz  
FIDRES 0.126314 Hz  
AQ 3.9584243 sec  
RG 90.5  
DW 60.400 usec  
DE 7.50 usec  
TE 300.0 K  
D1 1.00000000 sec

----- CHANNEL f1 -----  
NUC1 1H  
P1 9.00 usec  
PL1 0.00 dB  
SFO1 400.2024714 MHz  
SI 32768  
SF 400.2000028 MHz  
WDW EM  
SSB 0  
LB 0.30 Hz  
GB 0  
PC 1.00

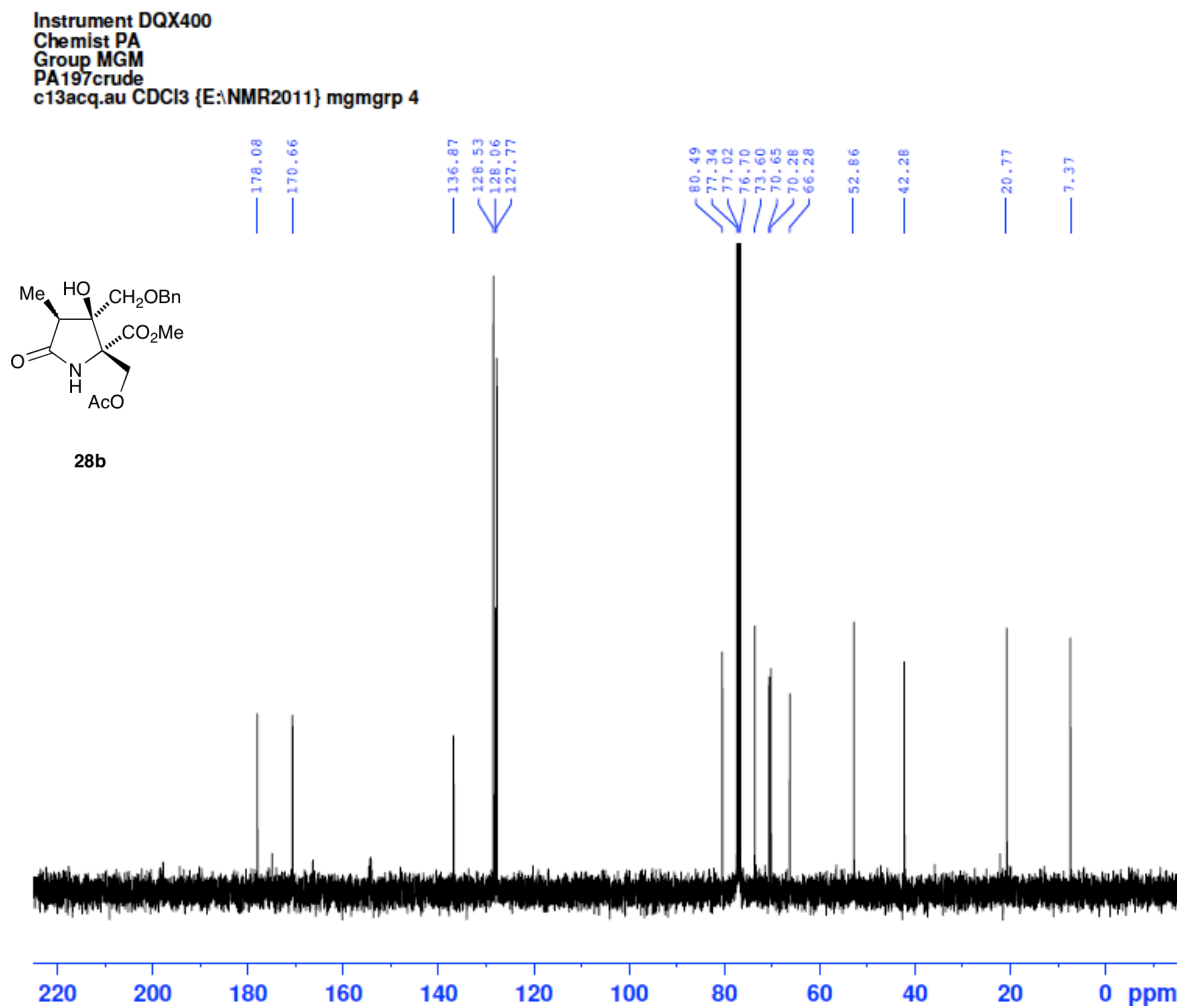

NMR@CHEM.OX

NAME Feb22-2011-4  
EXPNO 2  
PROCNO 1  
Date\_ 20110222  
Time\_ 18.22  
INSTRUM av400  
PROBHD 5 mm QNP 1H/13  
PULPROG zgpg30  
TD 32768  
SOLVENT CDCl3  
NS 256  
DS 4  
SWH 26178.010 Hz  
FIDRES 0.798889 Hz  
AQ 0.6259188 sec  
RG 32768  
DW 19.100 usec  
DE 7.50 usec  
TE 300.0 K  
D1 1.00000000 sec  
D11 0.03000000 sec  
TD0 1

----- CHANNEL f1 -----  
NUC1 13C  
P1 9.50 usec  
PL1 0.00 dB  
SFO1 100.6403931 MHz

----- CHANNEL f2 -----  
CPDPRG2 waltz16  
NUC2 1H  
PCPD2 80.00 usec  
PL2 0.00 dB  
PL12 19.00 dB  
PL13 25.00 dB  
SFO2 400.2016008 MHz  
SI 32768  
SF 100.6303718 MHz  
WDW EM  
SSB 0  
LB 1.00 Hz  
GB 0  
PC 1.40
